# Supplementary material for: MAPK Signaling and Inflammation Link Melanoma Phenotype Switching to Induction of CD73 during Immunotherapy
Source: Oxford University Press journal article supplement (doi:10.1158/0008-5472.can-17-0395), 2017-06-26
Supplement: 00085472can170395-sup-178710_2_supp_4097425_mrh4qm.xlsx [file 00085472can170395-sup-178710_2_supp_4097425_mrh4qm.xlsx]

## Sheet: Supplemental Table S5
Supplemental Table S5. Hallmark gene sets up in amelanotic BrafV600ExCdk4R24C melanomas versus pigmented BrafV600ExCdk4R24C melanomas (GSEA results). Hallmark gene set collection of the Broad MSigDb.
NAME	SIZE	ES	NES	NOM p-val	FDR q-val	FWER p-val	RANK AT MAX	LEADING EDGE
HALLMARK_EPITHELIAL_MESENCHYMAL_TRANSITION	178	0.651384	2.51275	0	0	0	2613	tags=55%, list=16%, signal=65%
HALLMARK_ANGIOGENESIS	32	0.710063	2.14366	0	0	0	1625	tags=47%, list=10%, signal=52%
HALLMARK_UV_RESPONSE_DN	115	0.519228	1.92695	0	0	0	2358	tags=38%, list=14%, signal=44%
HALLMARK_ALLOGRAFT_REJECTION	143	0.472387	1.78676	0	0.00103286	0.005	5035	tags=56%, list=30%, signal=79%
HALLMARK_INFLAMMATORY_RESPONSE	139	0.448171	1.68104	0	0.00652757	0.04	5674	tags=60%, list=34%, signal=90%
HALLMARK_TNFA_SIGNALING_VIA_NFKB	161	0.43436	1.66445	0	0.00639626	0.047	4889	tags=51%, list=29%, signal=71%
HALLMARK_INTERFERON_GAMMA_RESPONSE	149	0.425488	1.62371	0	0.0100477	0.086	4925	tags=47%, list=30%, signal=66%
HALLMARK_KRAS_SIGNALING_UP	143	0.426272	1.60802	0	0.0110242	0.105	4433	tags=41%, list=27%, signal=56%
HALLMARK_COAGULATION	102	0.438031	1.60345	0.00335946	0.010865	0.116	4287	tags=45%, list=26%, signal=60%
HALLMARK_TGF_BETA_SIGNALING	41	0.50239	1.56966	0.00630517	0.0152663	0.177	1999	tags=32%, list=12%, signal=36%
HALLMARK_APICAL_JUNCTION	158	0.411542	1.56732	0	0.0141762	0.181	3876	tags=37%, list=23%, signal=47%
HALLMARK_IL6_JAK_STAT3_SIGNALING	67	0.436535	1.50727	0.0229469	0.0263313	0.314	5779	tags=51%, list=35%, signal=77%
HALLMARK_WNT_BETA_CATENIN_SIGNALING	36	0.471877	1.4693	0.0355781	0.0389535	0.452	3301	tags=39%, list=20%, signal=48%
HALLMARK_COMPLEMENT	141	0.38209	1.42561	0.00980392	0.0574003	0.619	5035	tags=48%, list=30%, signal=69%
HALLMARK_HYPOXIA	167	0.350976	1.34034	0.0335861	0.122344	0.899	3367	tags=32%, list=20%, signal=39%
HALLMARK_MYOGENESIS	168	0.347148	1.32071	0.0359029	0.135867	0.94	3247	tags=27%, list=19%, signal=34%
HALLMARK_NOTCH_SIGNALING	30	0.429449	1.29378	0.144703	0.162409	0.972	2969	tags=33%, list=18%, signal=40%
HALLMARK_APOPTOSIS	130	0.34636	1.28952	0.0718232	0.158408	0.974	4971	tags=48%, list=30%, signal=67%
HALLMARK_G2M_CHECKPOINT	144	0.338143	1.28589	0.0635776	0.154663	0.98	5793	tags=48%, list=35%, signal=73%
HALLMARK_MITOTIC_SPINDLE	148	0.334166	1.26784	0.0734043	0.170368	0.991	4626	tags=39%, list=28%, signal=53%
HALLMARK_HEDGEHOG_SIGNALING	29	0.409539	1.20371	0.205357	0.262045	1	5012	tags=52%, list=30%, signal=74%
HALLMARK_SPERMATOGENESIS	70	0.34055	1.19329	0.204861	0.269284	1	5309	tags=39%, list=32%, signal=56%
HALLMARK_E2F_TARGETS	152	0.309335	1.18463	0.141758	0.273891	1	4925	tags=33%, list=30%, signal=46%
HALLMARK_APICAL_SURFACE	35	0.373062	1.15578	0.253197	0.31815	1	5601	tags=43%, list=34%, signal=64%
HALLMARK_IL2_STAT5_SIGNALING	151	0.30483	1.15488	0.188985	0.307343	1	4632	tags=36%, list=28%, signal=49%
HALLMARK_INTERFERON_ALPHA_RESPONSE	67	0.327012	1.12688	0.28068	0.351695	1	5024	tags=39%, list=30%, signal=55%
HALLMARK_P53_PATHWAY	157	0.291269	1.10976	0.258947	0.372611	1	2793	tags=23%, list=17%, signal=27%
HALLMARK_UNFOLDED_PROTEIN_RESPONSE	93	0.303958	1.09479	0.312289	0.390004	1	4211	tags=34%, list=25%, signal=46%
HALLMARK_MYC_TARGETS_V1	160	0.278998	1.06799	0.33833	0.434993	1	3732	tags=30%, list=22%, signal=38%
HALLMARK_ANDROGEN_RESPONSE	78	0.279527	0.989265	0.487805	0.600835	1	4964	tags=36%, list=30%, signal=51%
HALLMARK_PANCREAS_BETA_CELLS	25	0.33127	0.969014	0.504711	0.626015	1	4025	tags=32%, list=24%, signal=42%
HALLMARK_PROTEIN_SECRETION	82	0.256917	0.91805	0.6121	0.718782	1	3053	tags=24%, list=18%, signal=30%
HALLMARK_ESTROGEN_RESPONSE_LATE	163	0.233543	0.900188	0.707212	0.735935	1	6615	tags=48%, list=40%, signal=80%
HALLMARK_PI3K_AKT_MTOR_SIGNALING	84	0.240327	0.853165	0.732861	0.801436	1	3323	tags=29%, list=20%, signal=36%
HALLMARK_ESTROGEN_RESPONSE_EARLY	156	0.220273	0.833742	0.816129	0.810554	1	5678	tags=39%, list=34%, signal=59%
HALLMARK_KRAS_SIGNALING_DN	100	0.162044	0.580414	0.993443	0.994199	1	4902	tags=26%, list=29%, signal=37%
