# Supplementary material for: MAPK Signaling and Inflammation Link Melanoma Phenotype Switching to Induction of CD73 during Immunotherapy
Source: Oxford University Press journal article supplement (doi:10.1158/0008-5472.can-17-0395), 2017-06-26
Supplement: 00085472can170395-sup-178710_2_supp_4097428_srh4qj.xlsx [file 00085472can170395-sup-178710_2_supp_4097428_srh4qj.xlsx]

## Sheet: Supplemental Table S7
Supplemental Table S7. Hallmark gene sets up in ACT-treated relapse (R) HCmel3 melanomas versus early during treatment (EDT) HCmel3 melanomas (GSEA results). Hallmark gene set collection of the Broad MSigDb.
NAME	SIZE	ES	NES	NOM p-val	FDR q-val	FWER p-val	RANK AT MAX	LEADING EDGE		up in R (relapse) versus EDT (early during treatment)
HALLMARK_E2F_TARGETS	119	0.558688	2.59738	0	0	0	3875	tags=50%, list=22%, signal=63%
HALLMARK_G2M_CHECKPOINT	127	0.539265	2.53271	0	0	0	3370	tags=50%, list=19%, signal=61%
HALLMARK_MYC_TARGETS_V1	98	0.519537	2.34432	0	0	0	3710	tags=43%, list=21%, signal=54%
HALLMARK_UV_RESPONSE_DN	101	0.40706	1.83388	0.0016835	0.00344607	0.013	4317	tags=43%, list=25%, signal=56%
HALLMARK_EPITHELIAL_MESENCHYMAL_TRANSITION	168	0.364331	1.77944	0	0.004916	0.022	4642	tags=41%, list=26%, signal=55%
HALLMARK_ANDROGEN_RESPONSE	66	0.412897	1.72907	0.00344828	0.00790172	0.043	4313	tags=44%, list=25%, signal=58%
HALLMARK_MITOTIC_SPINDLE	120	0.366713	1.71092	0.00172117	0.00893372	0.056	3174	tags=35%, list=18%, signal=42%
HALLMARK_SPERMATOGENESIS	82	0.387789	1.70381	0	0.00916871	0.066	5574	tags=52%, list=32%, signal=76%
HALLMARK_DNA_REPAIR	70	0.367268	1.54899	0.0107143	0.0363862	0.255	3982	tags=34%, list=23%, signal=44%
HALLMARK_TGF_BETA_SIGNALING	40	0.403082	1.49759	0.026087	0.052335	0.389	2487	tags=33%, list=14%, signal=38%
HALLMARK_ANGIOGENESIS	29	0.429149	1.48861	0.0398551	0.0511969	0.412	4582	tags=55%, list=26%, signal=75%
HALLMARK_HEDGEHOG_SIGNALING	30	0.414334	1.46512	0.0416667	0.0581053	0.47	4529	tags=50%, list=26%, signal=67%
HALLMARK_MYC_TARGETS_V2	30	0.395283	1.38748	0.0795455	0.100708	0.703	838	tags=20%, list=5%, signal=21%
HALLMARK_UNFOLDED_PROTEIN_RESPONSE	64	0.327448	1.368	0.0616667	0.108722	0.745	4453	tags=41%, list=25%, signal=54%
HALLMARK_NOTCH_SIGNALING	26	0.390913	1.32631	0.108856	0.139404	0.842	3241	tags=38%, list=18%, signal=47%
HALLMARK_WNT_BETA_CATENIN_SIGNALING	30	0.374592	1.3088	0.112727	0.14788	0.878	2094	tags=27%, list=12%, signal=30%
HALLMARK_PROTEIN_SECRETION	59	0.314167	1.28917	0.104587	0.158749	0.916	4189	tags=39%, list=24%, signal=51%
HALLMARK_TNFA_SIGNALING_VIA_NFKB	157	0.255545	1.26605	0.0560897	0.174646	0.947	3452	tags=29%, list=20%, signal=36%
HALLMARK_GLYCOLYSIS	145	0.261339	1.26127	0.0664506	0.171492	0.953	3400	tags=27%, list=19%, signal=33%
HALLMARK_APOPTOSIS	119	0.265735	1.2493	0.111658	0.175924	0.959	2428	tags=22%, list=14%, signal=25%
HALLMARK_P53_PATHWAY	134	0.254863	1.20937	0.138408	0.21795	0.985	2046	tags=19%, list=12%, signal=22%
HALLMARK_MTORC1_SIGNALING	115	0.26052	1.20736	0.127451	0.210758	0.986	1864	tags=17%, list=11%, signal=19%
HALLMARK_APICAL_JUNCTION	134	0.235313	1.11806	0.232877	0.34668	0.997	5561	tags=41%, list=32%, signal=60%
HALLMARK_UV_RESPONSE_UP	101	0.233243	1.06596	0.328042	0.436537	1	1780	tags=21%, list=10%, signal=23%
HALLMARK_PEROXISOME	66	0.25455	1.05816	0.358974	0.435486	1	3264	tags=26%, list=19%, signal=32%
HALLMARK_OXIDATIVE_PHOSPHORYLATION	84	0.237075	1.05576	0.330619	0.424202	1	3346	tags=26%, list=19%, signal=32%
HALLMARK_KRAS_SIGNALING_DN	131	0.214029	1.01351	0.426598	0.504816	1	3829	tags=28%, list=22%, signal=36%
HALLMARK_MYOGENESIS	162	0.206093	1.00889	0.44688	0.497365	1	1425	tags=11%, list=8%, signal=12%
HALLMARK_CHOLESTEROL_HOMEOSTASIS	52	0.237087	0.949687	0.544964	0.617905	1	1518	tags=15%, list=9%, signal=17%
HALLMARK_BILE_ACID_METABOLISM	79	0.21745	0.94761	0.558824	0.601663	1	6565	tags=52%, list=37%, signal=83%
HALLMARK_PANCREAS_BETA_CELLS	27	0.221563	0.749965	0.832117	0.953188	1	6834	tags=44%, list=39%, signal=73%
HALLMARK_REACTIVE_OXIGEN_SPECIES_PATHWAY	25	0.22162	0.741357	0.802583	0.932261	1	1949	tags=20%, list=11%, signal=22%
NAME	SIZE	ES	NES	NOM p-val	FDR q-val	FWER p-val	RANK AT MAX	LEADING EDGE		down in R (relapse) versus EDT (early during treatment)
HALLMARK_INTERFERON_GAMMA_RESPONSE	156	-0.389645	-1.98028	0	0.00420659	0.005	2837	tags=31%, list=16%, signal=37%
HALLMARK_ALLOGRAFT_REJECTION	146	-0.356987	-1.80367	0	0.00940038	0.021	2031	tags=27%, list=12%, signal=31%
HALLMARK_INTERFERON_ALPHA_RESPONSE	68	-0.371158	-1.61663	0.0103896	0.032867	0.108	1442	tags=24%, list=8%, signal=26%
HALLMARK_COAGULATION	106	-0.315262	-1.50435	0.005	0.064015	0.257	1028	tags=17%, list=6%, signal=18%
HALLMARK_XENOBIOTIC_METABOLISM	140	-0.292511	-1.47263	0.00258398	0.0670231	0.321	1511	tags=17%, list=9%, signal=19%
HALLMARK_ADIPOGENESIS	132	-0.275451	-1.36152	0.03	0.140022	0.625	2376	tags=23%, list=14%, signal=26%
HALLMARK_IL2_STAT5_SIGNALING	148	-0.26231	-1.34196	0.0184697	0.137393	0.681	1175	tags=13%, list=7%, signal=14%
HALLMARK_FATTY_ACID_METABOLISM	98	-0.283793	-1.33094	0.0592593	0.130948	0.714	2651	tags=22%, list=15%, signal=26%
HALLMARK_IL6_JAK_STAT3_SIGNALING	69	-0.291114	-1.2794	0.1	0.167042	0.83	2472	tags=25%, list=14%, signal=29%
HALLMARK_COMPLEMENT	137	-0.242889	-1.22163	0.0987654	0.228571	0.931	1223	tags=14%, list=7%, signal=15%
HALLMARK_APICAL_SURFACE	36	-0.311916	-1.1787	0.209713	0.274118	0.97	1029	tags=14%, list=6%, signal=15%
HALLMARK_ESTROGEN_RESPONSE_LATE	141	-0.21408	-1.06483	0.302139	0.483238	1	2536	tags=19%, list=14%, signal=22%
HALLMARK_HEME_METABOLISM	129	-0.212972	-1.04821	0.340153	0.488561	1	1768	tags=15%, list=10%, signal=16%
HALLMARK_ESTROGEN_RESPONSE_EARLY	133	-0.204249	-1.01544	0.442748	0.536169	1	2536	tags=18%, list=14%, signal=21%
HALLMARK_INFLAMMATORY_RESPONSE	161	-0.192177	-0.970472	0.543307	0.618086	1	1402	tags=12%, list=8%, signal=13%
HALLMARK_KRAS_SIGNALING_UP	150	-0.186315	-0.952367	0.6	0.627748	1	3096	tags=21%, list=18%, signal=25%
HALLMARK_PI3K_AKT_MTOR_SIGNALING	66	-0.218322	-0.945652	0.557339	0.607817	1	1611	tags=14%, list=9%, signal=15%
HALLMARK_HYPOXIA	166	-0.172345	-0.876951	0.75718	0.726209	1	3436	tags=22%, list=20%, signal=27%
