# Supplementary material for: MAPK Signaling and Inflammation Link Melanoma Phenotype Switching to Induction of CD73 during Immunotherapy
Source: Oxford University Press journal article supplement (doi:10.1158/0008-5472.can-17-0395), 2017-06-26
Supplement: 00085472can170395-sup-178710_2_supp_4097431_lrh4qk.xlsx [file 00085472can170395-sup-178710_2_supp_4097431_lrh4qk.xlsx]

## Sheet: Supplemental Table S3
Supplemental Table S3. Gene sets correlating with NT5E (CD73) expression in MITFhigh melanoma cell lines from the Broad melanoma cell line panel (GSEA results). C2 gene set collection of the Broad MSigDB.
NAME	SIZE	ES	NES	NOM p-val	FDR q-val	FWER p-val	RANK AT MAX	LEADING EDGE
CHARAFE_BREAST_CANCER_LUMINAL_VS_BASAL_DN	360	0.527406	2.97836	0	0	0	2228	tags=42%, list=17%, signal=49%
SEIDEN_ONCOGENESIS_BY_MET	72	0.655706	2.88762	0	0	0	2812	tags=63%, list=21%, signal=79%
CHEN_HOXA5_TARGETS_9HR_UP	182	0.529036	2.75931	0	0	0	2923	tags=53%, list=22%, signal=67%
GHANDHI_BYSTANDER_IRRADIATION_UP	69	0.604494	2.719	0	0	0	1693	tags=48%, list=13%, signal=55%
WINZEN_DEGRADED_VIA_KHSRP	86	0.58882	2.69059	0	0	0	1817	tags=42%, list=14%, signal=48%
SEITZ_NEOPLASTIC_TRANSFORMATION_BY_8P_DELETION_UP	69	0.593618	2.60878	0	0	0	2320	tags=48%, list=17%, signal=58%
CHARAFE_BREAST_CANCER_LUMINAL_VS_MESENCHYMAL_DN	349	0.455476	2.58333	0	0	0	2614	tags=41%, list=20%, signal=50%
MILI_PSEUDOPODIA_HAPTOTAXIS_UP	348	0.458511	2.58092	0	0	0	3382	tags=49%, list=25%, signal=64%
BILD_HRAS_ONCOGENIC_SIGNATURE	190	0.493971	2.5693	0	0	0	3138	tags=50%, list=24%, signal=64%
KAN_RESPONSE_TO_ARSENIC_TRIOXIDE	110	0.53294	2.56732	0	0	0	1990	tags=37%, list=15%, signal=43%
XU_HGF_SIGNALING_NOT_VIA_AKT1_6HR	24	0.732676	2.55657	0	0	0	2026	tags=67%, list=15%, signal=78%
PHONG_TNF_RESPONSE_VIA_P38_PARTIAL	149	0.502219	2.5542	0	0	0	1658	tags=36%, list=12%, signal=40%
SCHOEN_NFKB_SIGNALING	31	0.690393	2.54814	0	0	0	1536	tags=48%, list=12%, signal=55%
NUYTTEN_NIPP1_TARGETS_UP	485	0.433413	2.5292	0	0	0	3026	tags=42%, list=23%, signal=53%
RODRIGUES_THYROID_CARCINOMA_POORLY_DIFFERENTIATED_UP	450	0.437333	2.52598	0	0	0	3363	tags=44%, list=25%, signal=57%
PETROVA_ENDOTHELIUM_LYMPHATIC_VS_BLOOD_DN	153	0.493767	2.52212	0	0	0	2183	tags=42%, list=16%, signal=49%
DACOSTA_UV_RESPONSE_VIA_ERCC3_COMMON_DN	409	0.440003	2.51004	0	0	0	2735	tags=41%, list=21%, signal=50%
MIYAGAWA_TARGETS_OF_EWSR1_ETS_FUSIONS_DN	161	0.484711	2.48215	0	0	0	2177	tags=39%, list=16%, signal=46%
PEDERSEN_TARGETS_OF_611CTF_ISOFORM_OF_ERBB2	66	0.557053	2.47828	0	0	0	3046	tags=56%, list=23%, signal=72%
BROWNE_HCMV_INFECTION_2HR_DN	47	0.620409	2.47736	0	0	0	746	tags=34%, list=6%, signal=36%
ZHENG_RESPONSE_TO_ARSENITE_UP	16	0.814191	2.47557	0	0	0	327	tags=50%, list=2%, signal=51%
PHONG_TNF_TARGETS_UP	59	0.576459	2.47286	0	0	0	1890	tags=46%, list=14%, signal=53%
LEE_LIVER_CANCER_HEPATOBLAST	15	0.802199	2.47212	0	0	0	1182	tags=67%, list=9%, signal=73%
LINDSTEDT_DENDRITIC_CELL_MATURATION_A	63	0.564678	2.4603	0	7.58e-05	0.001	1740	tags=40%, list=13%, signal=45%
GRAHAM_CML_QUIESCENT_VS_NORMAL_DIVIDING_UP	53	0.578763	2.45991	0	7.27e-05	0.001	2735	tags=57%, list=21%, signal=71%
GEISS_RESPONSE_TO_DSRNA_UP	36	0.634226	2.44061	0	6.99e-05	0.001	1182	tags=47%, list=9%, signal=52%
PEDERSEN_METASTASIS_BY_ERBB2_ISOFORM_1	37	0.624735	2.43991	0	6.74e-05	0.001	869	tags=38%, list=7%, signal=40%
DEBIASI_APOPTOSIS_BY_REOVIRUS_INFECTION_UP	272	0.445302	2.43653	0	6.49e-05	0.001	3024	tags=45%, list=23%, signal=57%
LIANG_SILENCED_BY_METHYLATION_2	50	0.590697	2.43457	0	6.27e-05	0.001	3108	tags=60%, list=23%, signal=78%
GHANDHI_DIRECT_IRRADIATION_UP	78	0.530554	2.42517	0	0.000118	0.002	1704	tags=44%, list=13%, signal=50%
WESTON_VEGFA_TARGETS_12HR	32	0.654938	2.4246	0	0.000114	0.002	1458	tags=47%, list=11%, signal=53%
RIGGINS_TAMOXIFEN_RESISTANCE_DN	194	0.461642	2.41425	0	0.00011	0.002	2711	tags=41%, list=20%, signal=51%
SENGUPTA_NASOPHARYNGEAL_CARCINOMA_WITH_LMP1_UP	279	0.435634	2.40626	0	0.000107	0.002	2356	tags=35%, list=18%, signal=41%
ZHANG_RESPONSE_TO_IKK_INHIBITOR_AND_TNF_UP	165	0.464163	2.39219	0	0.000104	0.002	2094	tags=38%, list=16%, signal=45%
LEE_LIVER_CANCER_SURVIVAL_DN	138	0.471006	2.38132	0	0.000101	0.002	2775	tags=40%, list=21%, signal=50%
CHICAS_RB1_TARGETS_SENESCENT	422	0.412525	2.37241	0	9.81e-05	0.002	2905	tags=38%, list=22%, signal=47%
MOSERLE_IFNA_RESPONSE	25	0.683473	2.3713	0	9.54e-05	0.002	3146	tags=76%, list=24%, signal=99%
REN_ALVEOLAR_RHABDOMYOSARCOMA_DN	386	0.417374	2.371	0	9.29e-05	0.002	2313	tags=36%, list=17%, signal=42%
HINATA_NFKB_TARGETS_KERATINOCYTE_UP	89	0.513163	2.36856	0	9.05e-05	0.002	2189	tags=45%, list=16%, signal=53%
KRASNOSELSKAYA_ILF3_TARGETS_UP	37	0.613355	2.36466	0	8.83e-05	0.002	3454	tags=70%, list=26%, signal=95%
SENESE_HDAC3_TARGETS_UP	389	0.409568	2.34728	0	0.000128	0.003	3152	tags=43%, list=24%, signal=55%
KIM_WT1_TARGETS_UP	185	0.446645	2.34611	0	0.000125	0.003	2921	tags=44%, list=22%, signal=56%
WEINMANN_ADAPTATION_TO_HYPOXIA_DN	39	0.601909	2.34514	0	0.000122	0.003	2181	tags=56%, list=16%, signal=67%
WU_CELL_MIGRATION	168	0.453288	2.3374	0	0.000159	0.004	1785	tags=35%, list=13%, signal=39%
SENGUPTA_NASOPHARYNGEAL_CARCINOMA_UP	215	0.438604	2.33498	0	0.000155	0.004	3055	tags=43%, list=23%, signal=55%
DE_YY1_TARGETS_DN	84	0.502628	2.32083	0	0.00019	0.005	2421	tags=50%, list=18%, signal=61%
HINATA_NFKB_TARGETS_FIBROBLAST_UP	82	0.508482	2.32032	0	0.000186	0.005	2149	tags=44%, list=16%, signal=52%
PID_INTEGRIN5_PATHWAY	17	0.733683	2.31801	0	0.000182	0.005	794	tags=47%, list=6%, signal=50%
NAKAMURA_ADIPOGENESIS_LATE_DN	36	0.604952	2.31206	0	0.000213	0.006	1383	tags=39%, list=10%, signal=43%
DAZARD_RESPONSE_TO_UV_SCC_UP	110	0.473378	2.30686	0	0.000209	0.006	2197	tags=35%, list=16%, signal=41%
RIGGI_EWING_SARCOMA_PROGENITOR_DN	135	0.461052	2.30611	0	0.000238	0.007	2568	tags=39%, list=19%, signal=47%
DER_IFN_BETA_RESPONSE_UP	96	0.489992	2.2993	0	0.000268	0.008	3462	tags=55%, list=26%, signal=74%
AKL_HTLV1_INFECTION_DN	58	0.536203	2.2953	0	0.000263	0.008	1456	tags=38%, list=11%, signal=42%
OLSSON_E2F3_TARGETS_DN	42	0.580037	2.29208	0	0.000258	0.008	2384	tags=48%, list=18%, signal=58%
TAKEDA_TARGETS_OF_NUP98_HOXA9_FUSION_3D_UP	130	0.461244	2.29141	0	0.000253	0.008	2950	tags=46%, list=22%, signal=59%
NAKAMURA_ADIPOGENESIS_EARLY_DN	38	0.593102	2.29129	0	0.000249	0.008	1383	tags=37%, list=10%, signal=41%
SANA_TNF_SIGNALING_UP	71	0.518474	2.28541	0	0.000306	0.01	1863	tags=39%, list=14%, signal=46%
JIANG_TIP30_TARGETS_UP	39	0.58674	2.28455	0	0.0003	0.01	2404	tags=54%, list=18%, signal=66%
HAMAI_APOPTOSIS_VIA_TRAIL_UP	463	0.390039	2.28178	0	0.000295	0.01	2667	tags=37%, list=20%, signal=44%
VERRECCHIA_EARLY_RESPONSE_TO_TGFB1	54	0.544688	2.27807	0	0.00029	0.01	1182	tags=41%, list=9%, signal=45%
SCHUETZ_BREAST_CANCER_DUCTAL_INVASIVE_UP	321	0.402345	2.27612	0	0.000286	0.01	2921	tags=41%, list=22%, signal=51%
VECCHI_GASTRIC_CANCER_ADVANCED_VS_EARLY_UP	132	0.449274	2.27088	0	0.000337	0.012	2659	tags=45%, list=20%, signal=55%
ZWANG_CLASS_3_TRANSIENTLY_INDUCED_BY_EGF	163	0.443593	2.26607	0	0.000332	0.012	1755	tags=31%, list=13%, signal=36%
WIEDERSCHAIN_TARGETS_OF_BMI1_AND_PCGF2	50	0.540069	2.25584	0	0.00038	0.014	1424	tags=42%, list=11%, signal=47%
TIAN_TNF_SIGNALING_VIA_NFKB	28	0.620589	2.25558	0	0.000374	0.014	2069	tags=54%, list=16%, signal=63%
ALTEMEIER_RESPONSE_TO_LPS_WITH_MECHANICAL_VENTILATION	107	0.466842	2.25478	0	0.000368	0.014	2189	tags=38%, list=16%, signal=45%
NEWMAN_ERCC6_TARGETS_UP	20	0.691983	2.25017	0	0.000415	0.016	2351	tags=60%, list=18%, signal=73%
BURTON_ADIPOGENESIS_7	46	0.545262	2.25017	0	0.000409	0.016	2167	tags=39%, list=16%, signal=47%
SENESE_HDAC1_TARGETS_UP	341	0.398985	2.24412	0	0.000427	0.017	3262	tags=43%, list=24%, signal=56%
GRAHAM_CML_DIVIDING_VS_NORMAL_QUIESCENT_DN	87	0.476414	2.24057	0	0.000421	0.017	2173	tags=41%, list=16%, signal=49%
GARGALOVIC_RESPONSE_TO_OXIDIZED_PHOSPHOLIPIDS_BLUE_UP	86	0.48249	2.23645	0	0.000491	0.02	2523	tags=41%, list=19%, signal=50%
PID_FRA_PATHWAY	35	0.574034	2.22745	0	0.000534	0.022	1768	tags=37%, list=13%, signal=43%
SANA_TNF_SIGNALING_DN	70	0.498004	2.2175	0	0.000668	0.027	3328	tags=53%, list=25%, signal=70%
RODRIGUES_THYROID_CARCINOMA_DN	61	0.510118	2.21523	0	0.000683	0.028	2428	tags=41%, list=18%, signal=50%
KOBAYASHI_EGFR_SIGNALING_6HR_DN	17	0.719624	2.21206	0	0.000697	0.029	1276	tags=47%, list=10%, signal=52%
BOWIE_RESPONSE_TO_TAMOXIFEN	17	0.696548	2.20532	0	0.000756	0.032	2950	tags=71%, list=22%, signal=91%
HIRSCH_CELLULAR_TRANSFORMATION_SIGNATURE_UP	215	0.413633	2.20515	0	0.000746	0.032	1920	tags=32%, list=14%, signal=37%
HORIUCHI_WTAP_TARGETS_UP	224	0.407836	2.19946	0	0.000826	0.036	2648	tags=38%, list=20%, signal=47%
AZARE_NEOPLASTIC_TRANSFORMATION_BY_STAT3_UP	108	0.46114	2.19721	0	0.000815	0.036	3074	tags=43%, list=23%, signal=55%
GENTILE_UV_HIGH_DOSE_DN	277	0.395483	2.19648	0	0.000827	0.037	2953	tags=39%, list=22%, signal=49%
BOQUEST_STEM_CELL_UP	239	0.405527	2.1889	0	0.000882	0.04	2279	tags=35%, list=17%, signal=41%
LIEN_BREAST_CARCINOMA_METAPLASTIC_VS_DUCTAL_UP	70	0.480785	2.18315	0	0.000997	0.046	2195	tags=44%, list=16%, signal=53%
GRAHAM_NORMAL_QUIESCENT_VS_NORMAL_DIVIDING_UP	60	0.508705	2.18263	0	0.000985	0.046	2590	tags=47%, list=19%, signal=58%
ONDER_CDH1_TARGETS_1_DN	145	0.432188	2.18219	0	0.000973	0.046	3511	tags=44%, list=26%, signal=59%
ZHANG_INTERFERON_RESPONSE	22	0.635756	2.18101	0	0.000982	0.047	3423	tags=77%, list=26%, signal=104%
LIEN_BREAST_CARCINOMA_METAPLASTIC	29	0.610614	2.17988	0	0.000991	0.048	1783	tags=48%, list=13%, signal=56%
SESTO_RESPONSE_TO_UV_C5	44	0.538158	2.17861	0	0.00102058	0.05	2355	tags=50%, list=18%, signal=61%
CLASPER_LYMPHATIC_VESSELS_DURING_METASTASIS_DN	32	0.590425	2.17847	0	0.00100898	0.05	3675	tags=63%, list=28%, signal=86%
BECKER_TAMOXIFEN_RESISTANCE_DN	49	0.526952	2.17844	0	0.000998	0.05	2479	tags=43%, list=19%, signal=52%
VERRECCHIA_RESPONSE_TO_TGFB1_C1	17	0.691936	2.17813	0	0.000987	0.05	2484	tags=59%, list=19%, signal=72%
BAELDE_DIABETIC_NEPHROPATHY_DN	389	0.378459	2.1646	0	0.00114603	0.059	2502	tags=35%, list=19%, signal=42%
HUANG_DASATINIB_RESISTANCE_UP	68	0.475202	2.16382	0	0.00115212	0.06	2172	tags=41%, list=16%, signal=49%
PETROVA_PROX1_TARGETS_DN	61	0.506327	2.16247	0	0.00121336	0.064	1990	tags=46%, list=15%, signal=54%
SIMBULAN_UV_RESPONSE_IMMORTALIZED_DN	30	0.589626	2.16044	0	0.00121934	0.065	1921	tags=50%, list=14%, signal=58%
DAZARD_UV_RESPONSE_CLUSTER_G28	20	0.645315	2.15251	0	0.00149631	0.08	1536	tags=45%, list=12%, signal=51%
PID_INTEGRIN1_PATHWAY	61	0.495223	2.1515	0	0.00148073	0.08	2172	tags=39%, list=16%, signal=47%
PETRETTO_CARDIAC_HYPERTROPHY	31	0.588643	2.14479	0	0.00157439	0.086	1274	tags=39%, list=10%, signal=43%
JEON_SMAD6_TARGETS_UP	20	0.639793	2.13814	0	0.00175617	0.093	1117	tags=35%, list=8%, signal=38%
MCBRYAN_PUBERTAL_BREAST_6_7WK_DN	62	0.501231	2.13724	0	0.00175636	0.094	2542	tags=42%, list=19%, signal=52%
MAHADEVAN_IMATINIB_RESISTANCE_UP	19	0.642391	2.13428	0	0.00184188	0.099	2602	tags=63%, list=20%, signal=78%
TAKEDA_TARGETS_OF_NUP98_HOXA9_FUSION_8D_UP	116	0.443483	2.1309	0	0.00187571	0.102	2355	tags=43%, list=18%, signal=52%
NIELSEN_MALIGNAT_FIBROUS_HISTIOCYTOMA_UP	18	0.6758	2.12894	0	0.00190856	0.104	1559	tags=61%, list=12%, signal=69%
CROMER_TUMORIGENESIS_UP	60	0.485463	2.12619	0	0.00195816	0.108	1565	tags=37%, list=12%, signal=41%
DAZARD_RESPONSE_TO_UV_NHEK_DN	270	0.383529	2.12093	0	0.00208996	0.117	3320	tags=44%, list=25%, signal=57%
PRAMOONJAGO_SOX4_TARGETS_UP	46	0.5144	2.11568	0	0.00217031	0.122	3124	tags=54%, list=23%, signal=71%
IKEDA_MIR30_TARGETS_UP	100	0.441559	2.11538	0	0.00214984	0.122	2713	tags=44%, list=20%, signal=55%
WANG_METHYLATED_IN_BREAST_CANCER	35	0.552317	2.10523	0	0.00229111	0.131	710	tags=29%, list=5%, signal=30%
ZWANG_CLASS_1_TRANSIENTLY_INDUCED_BY_EGF	330	0.370294	2.10438	0	0.00230142	0.133	1989	tags=27%, list=15%, signal=31%
MISHRA_CARCINOMA_ASSOCIATED_FIBROBLAST_UP	21	0.635348	2.10353	0	0.002312	0.135	2821	tags=52%, list=21%, signal=66%
MAHADEVAN_RESPONSE_TO_MP470_UP	17	0.673736	2.10344	0	0.00229098	0.135	3966	tags=82%, list=30%, signal=117%
WESTON_VEGFA_TARGETS_6HR	56	0.490093	2.09951	0	0.00234781	0.14	1559	tags=36%, list=12%, signal=40%
HENDRICKS_SMARCA4_TARGETS_UP	51	0.488673	2.0994	0	0.00232685	0.14	1389	tags=37%, list=10%, signal=41%
SENESE_HDAC2_TARGETS_UP	92	0.4405	2.09926	0	0.00230626	0.14	2461	tags=40%, list=18%, signal=49%
THEILGAARD_NEUTROPHIL_AT_SKIN_WOUND_UP	69	0.474329	2.09787	0	0.00231632	0.142	2046	tags=41%, list=15%, signal=48%
KOBAYASHI_EGFR_SIGNALING_24HR_DN	221	0.385298	2.09134	0	0.00250855	0.153	2916	tags=33%, list=22%, signal=42%
SEKI_INFLAMMATORY_RESPONSE_LPS_UP	63	0.482946	2.08943	0	0.00257724	0.158	1744	tags=37%, list=13%, signal=42%
GAUSSMANN_MLL_AF4_FUSION_TARGETS_E_UP	73	0.46592	2.08871	0	0.00257006	0.159	2376	tags=37%, list=18%, signal=45%
LINDGREN_BLADDER_CANCER_CLUSTER_2B	325	0.372727	2.08114	0	0.00288928	0.176	2836	tags=37%, list=21%, signal=46%
CHARAFE_BREAST_CANCER_BASAL_VS_MESENCHYMAL_DN	37	0.536919	2.08057	0	0.002865	0.176	2104	tags=38%, list=16%, signal=45%
GRAHAM_CML_QUIESCENT_VS_CML_DIVIDING_UP	22	0.613438	2.07995	0	0.0028849	0.179	2513	tags=55%, list=19%, signal=67%
BURTON_ADIPOGENESIS_PEAK_AT_8HR	34	0.550043	2.07794	0	0.00291857	0.183	2888	tags=59%, list=22%, signal=75%
ZHANG_TLX_TARGETS_36HR_DN	133	0.428882	2.07785	0	0.00289465	0.183	2669	tags=38%, list=20%, signal=47%
KANG_DOXORUBICIN_RESISTANCE_DN	17	0.644256	2.07643	0	0.00291342	0.186	2358	tags=59%, list=18%, signal=71%
OSMAN_BLADDER_CANCER_UP	300	0.370507	2.07454	0	0.00294599	0.19	3311	tags=40%, list=25%, signal=52%
NAGASHIMA_NRG1_SIGNALING_UP	157	0.39997	2.07321	0	0.0029781	0.193	1906	tags=27%, list=14%, signal=32%
ONDER_CDH1_SIGNALING_VIA_CTNNB1	70	0.462827	2.07156	0	0.00301028	0.196	3108	tags=50%, list=23%, signal=65%
XU_RESPONSE_TO_TRETINOIN_AND_NSC682994_UP	17	0.665168	2.06967	0	0.00313621	0.206	1668	tags=53%, list=13%, signal=60%
JOHNSTONE_PARVB_TARGETS_1_DN	39	0.531716	2.06572	0	0.0032068	0.212	1873	tags=44%, list=14%, signal=51%
DORN_ADENOVIRUS_INFECTION_24HR_DN	37	0.527769	2.0641	0	0.00327572	0.219	754	tags=32%, list=6%, signal=34%
JOHNSTONE_PARVB_TARGETS_2_DN	243	0.387265	2.06311	0	0.00326388	0.219	2602	tags=36%, list=20%, signal=44%
PEDERSEN_METASTASIS_BY_ERBB2_ISOFORM_7	291	0.372752	2.06126	0	0.00331833	0.224	2378	tags=35%, list=18%, signal=41%
PHONG_TNF_RESPONSE_NOT_VIA_P38	306	0.367782	2.05713	0	0.00352992	0.236	2102	tags=31%, list=16%, signal=36%
SESTO_RESPONSE_TO_UV_C3	20	0.624335	2.05544	0.00246305	0.00358183	0.239	832	tags=35%, list=6%, signal=37%
SESTO_RESPONSE_TO_UV_C2	47	0.512079	2.0547	0	0.00356803	0.24	2994	tags=62%, list=22%, signal=79%
AMIT_EGF_RESPONSE_120_MCF10A	40	0.522523	2.05374	0	0.00358084	0.241	1913	tags=35%, list=14%, signal=41%
DAZARD_UV_RESPONSE_CLUSTER_G6	125	0.417517	2.05045	0	0.00364519	0.247	3285	tags=49%, list=25%, signal=64%
NAGASHIMA_EGF_SIGNALING_UP	52	0.489038	2.04965	0.00286533	0.00366956	0.249	703	tags=23%, list=5%, signal=24%
XU_HGF_SIGNALING_NOT_VIA_AKT1_48HR_UP	34	0.540408	2.0477	0	0.00373214	0.255	1920	tags=50%, list=14%, signal=58%
BROWNE_INTERFERON_RESPONSIVE_GENES	63	0.465918	2.04725	0	0.00371788	0.256	3859	tags=59%, list=29%, signal=82%
SARTIPY_NORMAL_AT_INSULIN_RESISTANCE_UP	27	0.576471	2.04697	0	0.00370386	0.257	3500	tags=63%, list=26%, signal=85%
ZHU_CMV_24_HR_DN	87	0.444741	2.04553	0	0.00374035	0.26	1546	tags=31%, list=12%, signal=35%
WU_HBX_TARGETS_2_DN	15	0.683048	2.04082	0.0026178	0.00382418	0.267	2358	tags=53%, list=18%, signal=65%
KYNG_DNA_DAMAGE_DN	175	0.398162	2.04012	0	0.00384671	0.27	1536	tags=27%, list=12%, signal=30%
BROWNE_HCMV_INFECTION_24HR_DN	135	0.404303	2.03871	0	0.00392785	0.278	2760	tags=40%, list=21%, signal=50%
AMIT_SERUM_RESPONSE_240_MCF10A	54	0.491458	2.03776	0	0.00398462	0.282	1135	tags=31%, list=9%, signal=34%
TRAYNOR_RETT_SYNDROM_UP	30	0.56232	2.03596	0	0.00400515	0.283	2275	tags=50%, list=17%, signal=60%
CORRE_MULTIPLE_MYELOMA_UP	49	0.494501	2.03299	0	0.00408446	0.289	1721	tags=39%, list=13%, signal=44%
WANG_SMARCE1_TARGETS_DN	308	0.364044	2.03276	0	0.00408037	0.291	2486	tags=33%, list=19%, signal=39%
SHEN_SMARCA2_TARGETS_UP	347	0.359295	2.03254	0	0.00405299	0.291	3483	tags=47%, list=26%, signal=62%
GENTILE_UV_RESPONSE_CLUSTER_D6	30	0.55225	2.02865	0	0.00420046	0.301	1990	tags=40%, list=15%, signal=47%
HARRIS_BRAIN_CANCER_PROGENITORS	33	0.553049	2.02862	0	0.00417265	0.301	1960	tags=39%, list=15%, signal=46%
PLASARI_TGFB1_TARGETS_10HR_UP	160	0.38758	2.02849	0	0.0041452	0.301	1950	tags=32%, list=15%, signal=37%
VETTER_TARGETS_OF_PRKCA_AND_ETS1_DN	16	0.6675	2.02538	0	0.00422031	0.308	1126	tags=50%, list=8%, signal=55%
DACOSTA_UV_RESPONSE_VIA_ERCC3_XPCS_DN	73	0.454207	2.02431	0	0.00420434	0.309	2606	tags=45%, list=20%, signal=56%
DAVICIONI_TARGETS_OF_PAX_FOXO1_FUSIONS_UP	233	0.374838	2.02195	0	0.00429034	0.316	1817	tags=28%, list=14%, signal=32%
MISSIAGLIA_REGULATED_BY_METHYLATION_UP	106	0.4202	2.019	0	0.00435215	0.322	2970	tags=42%, list=22%, signal=54%
HELLEBREKERS_SILENCED_DURING_TUMOR_ANGIOGENESIS	71	0.452712	2.01893	0	0.00432443	0.322	1538	tags=30%, list=12%, signal=33%
WENDT_COHESIN_TARGETS_UP	24	0.575015	2.01877	0	0.00431935	0.324	1797	tags=46%, list=13%, signal=53%
HIRSCH_CELLULAR_TRANSFORMATION_SIGNATURE_DN	89	0.433704	2.01865	0	0.00429218	0.324	2010	tags=36%, list=15%, signal=42%
PLASARI_TGFB1_TARGETS_1HR_UP	28	0.55811	2.01756	0.00236967	0.00427619	0.325	1818	tags=39%, list=14%, signal=45%
ZHENG_BOUND_BY_FOXP3	342	0.354351	2.01389	0	0.0043685	0.332	1917	tags=27%, list=14%, signal=31%
BERENJENO_ROCK_SIGNALING_NOT_VIA_RHOA_DN	43	0.501843	2.0125	0	0.00450235	0.341	2538	tags=44%, list=19%, signal=54%
YANG_BREAST_CANCER_ESR1_LASER_DN	45	0.492614	2.01031	0	0.00467766	0.356	2758	tags=40%, list=21%, signal=50%
ELVIDGE_HYPOXIA_BY_DMOG_UP	114	0.407968	2.00871	0	0.00473387	0.361	2596	tags=35%, list=19%, signal=43%
GUENTHER_GROWTH_SPHERICAL_VS_ADHERENT_DN	26	0.575031	2.00822	0	0.00472631	0.361	2038	tags=42%, list=15%, signal=50%
MANTOVANI_NFKB_TARGETS_UP	34	0.543769	2.00684	0	0.00475032	0.363	2224	tags=44%, list=17%, signal=53%
PID_UPA_UPAR_PATHWAY	37	0.515833	2.0057	0	0.00476334	0.367	794	tags=30%, list=6%, signal=32%
LU_AGING_BRAIN_UP	233	0.367455	2.00524	0	0.00475592	0.369	2808	tags=36%, list=21%, signal=45%
ABBUD_LIF_SIGNALING_1_DN	21	0.595035	2.00399	0	0.00474848	0.37	1444	tags=43%, list=11%, signal=48%
BERENJENO_TRANSFORMED_BY_RHOA_FOREVER_DN	27	0.552548	2.00367	0	0.00476241	0.372	1792	tags=30%, list=13%, signal=34%
BROWNE_HCMV_INFECTION_20HR_DN	97	0.422048	2.00227	0	0.00478483	0.376	2184	tags=36%, list=16%, signal=43%
SHEDDEN_LUNG_CANCER_POOR_SURVIVAL_A6	388	0.351263	2.00146	0	0.00479796	0.378	3378	tags=40%, list=25%, signal=52%
BILD_CTNNB1_ONCOGENIC_SIGNATURE	57	0.46595	1.99984	0	0.00483026	0.384	3273	tags=53%, list=25%, signal=69%
FERRARI_RESPONSE_TO_FENRETINIDE_UP	19	0.617858	1.99705	0	0.0049722	0.399	1536	tags=47%, list=12%, signal=53%
BURTON_ADIPOGENESIS_PEAK_AT_2HR	46	0.483256	1.99363	0	0.0051231	0.412	832	tags=26%, list=6%, signal=28%
KYNG_ENVIRONMENTAL_STRESS_RESPONSE_UP	51	0.481847	1.98918	0	0.00545897	0.434	1536	tags=35%, list=12%, signal=40%
WESTON_VEGFA_TARGETS	99	0.421496	1.98689	0	0.00558601	0.442	1559	tags=31%, list=12%, signal=35%
KOYAMA_SEMA3B_TARGETS_UP	195	0.378259	1.98083	0	0.00595433	0.465	2202	tags=31%, list=17%, signal=36%
CHICAS_RB1_TARGETS_GROWING	199	0.379626	1.97553	0	0.00631294	0.49	2595	tags=32%, list=19%, signal=39%
MOREAUX_MULTIPLE_MYELOMA_BY_TACI_DN	120	0.400488	1.97344	0	0.00646265	0.499	3389	tags=46%, list=25%, signal=61%
DELACROIX_RAR_TARGETS_DN	20	0.59594	1.97258	0.00233645	0.00648442	0.499	2916	tags=55%, list=22%, signal=70%
ROZANOV_MMP14_TARGETS_SUBSET	29	0.5353	1.96854	0	0.00672572	0.508	3613	tags=69%, list=27%, signal=94%
BERENJENO_TRANSFORMED_BY_RHOA_REVERSIBLY_DN	24	0.561183	1.96734	0	0.00674597	0.51	696	tags=33%, list=5%, signal=35%
RASHI_NFKB1_TARGETS	17	0.62559	1.96669	0.005	0.00671864	0.51	2069	tags=59%, list=16%, signal=70%
DER_IFN_ALPHA_RESPONSE_UP	71	0.44134	1.96291	0	0.0069727	0.531	3446	tags=52%, list=26%, signal=70%
JOHNSTONE_PARVB_TARGETS_3_UP	327	0.348112	1.96033	0	0.0070647	0.536	2086	tags=28%, list=16%, signal=33%
SUNG_METASTASIS_STROMA_UP	88	0.426072	1.95984	0	0.00708265	0.539	1389	tags=27%, list=10%, signal=30%
ANASTASSIOU_CANCER_MESENCHYMAL_TRANSITION_SIGNATURE	60	0.448181	1.95803	0	0.00716562	0.545	1443	tags=33%, list=11%, signal=37%
GROSS_HYPOXIA_VIA_ELK3_DN	130	0.395195	1.95464	0	0.00739473	0.56	2568	tags=36%, list=19%, signal=44%
AMIT_EGF_RESPONSE_480_HELA	142	0.389317	1.95362	0	0.00743858	0.563	2172	tags=33%, list=16%, signal=39%
OSADA_ASCL1_TARGETS_DN	21	0.569989	1.95019	0.00243902	0.00761938	0.57	1317	tags=38%, list=10%, signal=42%
AMIT_EGF_RESPONSE_60_MCF10A	36	0.514613	1.94945	0.00508906	0.00758873	0.57	2921	tags=44%, list=22%, signal=57%
CROONQUIST_NRAS_VS_STROMAL_STIMULATION_DN	89	0.416353	1.94638	0	0.00782945	0.584	2595	tags=35%, list=19%, signal=43%
VERRECCHIA_RESPONSE_TO_TGFB1_C2	24	0.547875	1.94625	0.005	0.00780687	0.585	794	tags=38%, list=6%, signal=40%
GOTZMANN_EPITHELIAL_TO_MESENCHYMAL_TRANSITION_UP	64	0.449915	1.94166	0	0.00810638	0.597	2555	tags=38%, list=19%, signal=46%
PID_INTEGRIN3_PATHWAY	42	0.491344	1.93938	0.00260417	0.00823358	0.602	1501	tags=33%, list=11%, signal=37%
GALINDO_IMMUNE_RESPONSE_TO_ENTEROTOXIN	75	0.432689	1.93925	0	0.00820933	0.602	1963	tags=32%, list=15%, signal=37%
LANDIS_ERBB2_BREAST_TUMORS_324_UP	116	0.396067	1.92945	0	0.00900429	0.634	3034	tags=46%, list=23%, signal=59%
TSAI_RESPONSE_TO_RADIATION_THERAPY	31	0.535012	1.92856	0	0.00903815	0.636	2921	tags=48%, list=22%, signal=62%
CHIARADONNA_NEOPLASTIC_TRANSFORMATION_KRAS_CDC25_UP	49	0.472074	1.92554	0	0.00929688	0.648	1920	tags=39%, list=14%, signal=45%
ENK_UV_RESPONSE_KERATINOCYTE_DN	437	0.334651	1.92456	0	0.00938927	0.656	2683	tags=34%, list=20%, signal=41%
ZHENG_FOXP3_TARGETS_IN_THYMUS_UP	145	0.385003	1.92182	0	0.0095481	0.664	3346	tags=43%, list=25%, signal=56%
GRUETZMANN_PANCREATIC_CANCER_UP	320	0.3416	1.92143	0	0.00954435	0.667	2951	tags=35%, list=22%, signal=44%
HUPER_BREAST_BASAL_VS_LUMINAL_UP	51	0.457305	1.92126	0	0.00951463	0.667	2351	tags=41%, list=18%, signal=50%
TAKEDA_TARGETS_OF_NUP98_HOXA9_FUSION_10D_UP	138	0.381845	1.92038	0	0.00950958	0.669	2981	tags=43%, list=22%, signal=55%
PID_NFKAPPAB_CANONICAL_PATHWAY	21	0.581746	1.92029	0	0.00946342	0.669	1953	tags=52%, list=15%, signal=61%
PID_INTEGRIN_CS_PATHWAY	23	0.571728	1.91875	0	0.00952633	0.674	764	tags=39%, list=6%, signal=41%
ZHANG_PROLIFERATING_VS_QUIESCENT	49	0.458806	1.91434	0	0.00990702	0.692	2384	tags=37%, list=18%, signal=45%
EPPERT_HSC_R	89	0.410659	1.9138	0	0.00990094	0.693	2523	tags=37%, list=19%, signal=45%
WILSON_PROTEASES_AT_TUMOR_BONE_INTERFACE_UP	21	0.578032	1.91218	0	0.0100365	0.699	4372	tags=76%, list=33%, signal=113%
ZHANG_RESPONSE_TO_CANTHARIDIN_UP	17	0.594947	1.91027	0.00230947	0.0102203	0.706	1779	tags=47%, list=13%, signal=54%
BAE_BRCA1_TARGETS_DN	30	0.523643	1.90705	0	0.0104931	0.719	1135	tags=27%, list=9%, signal=29%
KEEN_RESPONSE_TO_ROSIGLITAZONE_DN	92	0.409311	1.9067	0	0.0104934	0.719	2604	tags=35%, list=20%, signal=43%
ONDER_CDH1_TARGETS_3_DN	50	0.465739	1.90563	0	0.0105333	0.725	2026	tags=34%, list=15%, signal=40%
VERHAAK_GLIOBLASTOMA_MESENCHYMAL	197	0.359675	1.90464	0	0.0105891	0.725	2172	tags=30%, list=16%, signal=35%
ONDER_CDH1_TARGETS_2_UP	221	0.351578	1.90325	0	0.0106529	0.729	2686	tags=35%, list=20%, signal=43%
SUZUKI_RESPONSE_TO_TSA_AND_DECITABINE_1A	20	0.582589	1.90315	0	0.0106281	0.73	2563	tags=55%, list=19%, signal=68%
TONKS_TARGETS_OF_RUNX1_RUNX1T1_FUSION_MONOCYTE_UP	174	0.368846	1.90098	0	0.0108827	0.74	1487	tags=26%, list=11%, signal=29%
KOKKINAKIS_METHIONINE_DEPRIVATION_48HR_UP	122	0.391082	1.90066	0	0.0108569	0.741	1570	tags=25%, list=12%, signal=29%
DAUER_STAT3_TARGETS_UP	45	0.469162	1.89947	0	0.0108962	0.743	663	tags=22%, list=5%, signal=23%
AMIT_EGF_RESPONSE_480_MCF10A	38	0.483764	1.89819	0	0.0110527	0.747	1606	tags=34%, list=12%, signal=39%
BURTON_ADIPOGENESIS_11	43	0.474597	1.89781	0	0.0110733	0.748	2639	tags=44%, list=20%, signal=55%
NAKAMURA_TUMOR_ZONE_PERIPHERAL_VS_CENTRAL_UP	201	0.360285	1.89546	0	0.0113187	0.761	2755	tags=37%, list=21%, signal=46%
LIM_MAMMARY_STEM_CELL_UP	348	0.332598	1.89537	0	0.0112837	0.761	1920	tags=28%, list=14%, signal=31%
REACTOME_LIPID_DIGESTION_MOBILIZATION_AND_TRANSPORT	41	0.474381	1.89331	0.00544959	0.0114339	0.769	1386	tags=34%, list=10%, signal=38%
BOWIE_RESPONSE_TO_EXTRACELLULAR_MATRIX	17	0.614464	1.89258	0.00475059	0.011491	0.77	2950	tags=65%, list=22%, signal=83%
FLECHNER_BIOPSY_KIDNEY_TRANSPLANT_OK_VS_DONOR_UP	480	0.325528	1.89084	0	0.0117099	0.777	2851	tags=35%, list=21%, signal=43%
ZUCCHI_METASTASIS_DN	39	0.478316	1.88715	0	0.0120635	0.782	1560	tags=33%, list=12%, signal=38%
SENESE_HDAC1_AND_HDAC2_TARGETS_UP	179	0.361168	1.88644	0	0.0120562	0.783	3124	tags=40%, list=23%, signal=52%
AMIT_EGF_RESPONSE_240_HELA	54	0.450951	1.88625	0	0.0120115	0.783	3123	tags=46%, list=23%, signal=60%
PLASARI_TGFB1_TARGETS_10HR_DN	189	0.356356	1.87952	0	0.0126529	0.808	2215	tags=31%, list=17%, signal=36%
KIM_WT1_TARGETS_8HR_UP	154	0.373419	1.87938	0	0.0126431	0.808	2786	tags=38%, list=21%, signal=48%
AMIT_SERUM_RESPONSE_60_MCF10A	52	0.44959	1.87922	0	0.0126187	0.808	2921	tags=46%, list=22%, signal=59%
GENTILE_UV_RESPONSE_CLUSTER_D4	49	0.455698	1.87768	0	0.0127721	0.812	2394	tags=43%, list=18%, signal=52%
JOSEPH_RESPONSE_TO_SODIUM_BUTYRATE_UP	29	0.51055	1.87615	0.00239234	0.0129183	0.814	856	tags=28%, list=6%, signal=29%
CHIARADONNA_NEOPLASTIC_TRANSFORMATION_CDC25_UP	103	0.400214	1.87601	0	0.0128856	0.814	2482	tags=37%, list=19%, signal=45%
AMIT_EGF_RESPONSE_40_HELA	38	0.489555	1.87562	0.00294118	0.0128677	0.814	2828	tags=53%, list=21%, signal=67%
DORN_ADENOVIRUS_INFECTION_48HR_DN	33	0.49621	1.87554	0	0.012821	0.814	601	tags=27%, list=5%, signal=28%
FRIDMAN_IMMORTALIZATION_DN	30	0.514162	1.87551	0	0.0127674	0.814	2923	tags=57%, list=22%, signal=72%
FULCHER_INFLAMMATORY_RESPONSE_LECTIN_VS_LPS_UP	420	0.325142	1.87501	0	0.0127657	0.814	1981	tags=26%, list=15%, signal=30%
PECE_MAMMARY_STEM_CELL_DN	96	0.397994	1.87378	0	0.0128286	0.816	2902	tags=43%, list=22%, signal=54%
WINNEPENNINCKX_MELANOMA_METASTASIS_UP	113	0.380125	1.87334	0	0.0128252	0.818	4131	tags=48%, list=31%, signal=69%
PICCALUGA_ANGIOIMMUNOBLASTIC_LYMPHOMA_UP	171	0.365705	1.87317	0	0.0127869	0.819	2519	tags=34%, list=19%, signal=41%
DASU_IL6_SIGNALING_UP	55	0.451541	1.87205	0.00849858	0.0128561	0.822	1098	tags=27%, list=8%, signal=30%
BOQUEST_STEM_CELL_CULTURED_VS_FRESH_UP	390	0.325209	1.87177	0	0.0128179	0.823	2808	tags=36%, list=21%, signal=45%
GERY_CEBP_TARGETS	110	0.385588	1.87175	0	0.0127803	0.823	2604	tags=32%, list=20%, signal=39%
IGLESIAS_E2F_TARGETS_UP	138	0.375604	1.86958	0	0.0129824	0.829	2582	tags=35%, list=19%, signal=43%
WOOD_EBV_EBNA1_TARGETS_DN	45	0.47163	1.86864	0	0.0130502	0.833	2604	tags=40%, list=20%, signal=50%
HADDAD_T_LYMPHOCYTE_AND_NK_PROGENITOR_UP	72	0.418583	1.86728	0	0.0132085	0.836	2590	tags=46%, list=19%, signal=57%
DELYS_THYROID_CANCER_UP	411	0.323096	1.86612	0	0.0133854	0.841	1582	tags=22%, list=12%, signal=25%
SUNG_METASTASIS_STROMA_DN	41	0.463509	1.8635	0	0.0136395	0.851	796	tags=22%, list=6%, signal=23%
LINDVALL_IMMORTALIZED_BY_TERT_DN	63	0.427785	1.86347	0	0.0135854	0.851	1538	tags=33%, list=12%, signal=38%
LEONARD_HYPOXIA	38	0.480797	1.86202	0.0026178	0.0137518	0.851	2762	tags=53%, list=21%, signal=66%
KARLSSON_TGFB1_TARGETS_UP	97	0.390964	1.86049	0	0.0139028	0.854	2866	tags=43%, list=22%, signal=55%
NAKAYAMA_FRA2_TARGETS	34	0.4877	1.85971	0	0.0139233	0.854	3261	tags=53%, list=24%, signal=70%
SESTO_RESPONSE_TO_UV_C7	66	0.425549	1.85969	0	0.0138689	0.854	2916	tags=38%, list=22%, signal=48%
PUIFFE_INVASION_INHIBITED_BY_ASCITES_DN	121	0.379938	1.8589	0	0.01395	0.855	3459	tags=45%, list=26%, signal=61%
UROSEVIC_RESPONSE_TO_IMIQUIMOD	22	0.545418	1.85549	0	0.0143154	0.862	3912	tags=77%, list=29%, signal=109%
BLUM_RESPONSE_TO_SALIRASIB_UP	223	0.345535	1.85342	0	0.0145826	0.872	3197	tags=37%, list=24%, signal=48%
CHICAS_RB1_TARGETS_CONFLUENT	427	0.320872	1.85307	0	0.0145596	0.872	2392	tags=30%, list=18%, signal=36%
GESERICK_TERT_TARGETS_DN	18	0.577424	1.85258	0	0.0145911	0.873	353	tags=28%, list=3%, signal=28%
RUIZ_TNC_TARGETS_DN	127	0.369463	1.85206	0	0.0146156	0.874	3117	tags=39%, list=23%, signal=50%
NAKAMURA_ADIPOGENESIS_EARLY_UP	55	0.441414	1.852	0	0.0145798	0.874	1258	tags=29%, list=9%, signal=32%
GILDEA_METASTASIS	27	0.513945	1.85167	0.0025641	0.0145574	0.875	3804	tags=56%, list=29%, signal=78%
CROONQUIST_STROMAL_STIMULATION_UP	54	0.440797	1.85126	0.00260417	0.0145877	0.875	1658	tags=35%, list=12%, signal=40%
MCLACHLAN_DENTAL_CARIES_UP	226	0.340521	1.84893	0	0.0148141	0.88	3124	tags=38%, list=23%, signal=48%
EINAV_INTERFERON_SIGNATURE_IN_CANCER	24	0.535102	1.84793	0	0.0148822	0.881	2355	tags=46%, list=18%, signal=56%
VANHARANTA_UTERINE_FIBROID_DN	58	0.429654	1.84561	0	0.0151714	0.887	2588	tags=36%, list=19%, signal=45%
AMIT_EGF_RESPONSE_120_HELA	62	0.423511	1.8452	0	0.0151797	0.888	2205	tags=32%, list=17%, signal=38%
LA_MEN1_TARGETS	19	0.572047	1.84373	0.00246305	0.0153044	0.892	881	tags=37%, list=7%, signal=39%
PICCALUGA_ANGIOIMMUNOBLASTIC_LYMPHOMA_DN	99	0.395007	1.84301	0	0.0153128	0.893	3140	tags=41%, list=24%, signal=54%
DORN_ADENOVIRUS_INFECTION_32HR_DN	32	0.493667	1.84161	0.00268096	0.0154417	0.894	601	tags=25%, list=5%, signal=26%
COULOUARN_TEMPORAL_TGFB1_SIGNATURE_UP	79	0.405942	1.84156	0	0.0153851	0.894	2596	tags=42%, list=19%, signal=52%
FOURNIER_ACINAR_DEVELOPMENT_LATE_2	247	0.335822	1.83833	0	0.0157925	0.904	1920	tags=22%, list=14%, signal=25%
HERNANDEZ_MITOTIC_ARREST_BY_DOCETAXEL_2_UP	54	0.43898	1.83604	0	0.016083	0.911	1107	tags=28%, list=8%, signal=30%
REACTOME_PREFOLDIN_MEDIATED_TRANSFER_OF_SUBSTRATE_TO_CCT_TRIC	20	0.549945	1.83277	0.00251889	0.0165929	0.919	2758	tags=60%, list=21%, signal=76%
DELPUECH_FOXO3_TARGETS_UP	65	0.413769	1.83066	0	0.0168963	0.926	1395	tags=25%, list=10%, signal=27%
MCBRYAN_PUBERTAL_BREAST_4_5WK_UP	215	0.343883	1.82699	0	0.0174314	0.933	2499	tags=32%, list=19%, signal=38%
BROWNE_HCMV_INFECTION_16HR_DN	77	0.397135	1.82471	0	0.0177127	0.935	1231	tags=30%, list=9%, signal=33%
ZHU_CMV_8_HR_UP	44	0.450304	1.82458	0	0.0176867	0.936	3446	tags=55%, list=26%, signal=73%
FOSTER_TOLERANT_MACROPHAGE_DN	300	0.325439	1.82259	0	0.0178771	0.938	3030	tags=35%, list=23%, signal=45%
TIEN_INTESTINE_PROBIOTICS_24HR_DN	190	0.349907	1.82098	0	0.0180364	0.943	2348	tags=27%, list=18%, signal=33%
DACOSTA_UV_RESPONSE_VIA_ERCC3_TTD_DN	66	0.410375	1.81973	0	0.0181693	0.944	3011	tags=42%, list=23%, signal=55%
XU_HGF_TARGETS_INDUCED_BY_AKT1_6HR	17	0.584792	1.81813	0.00492611	0.0183545	0.946	3700	tags=76%, list=28%, signal=106%
MATTHEWS_AP1_TARGETS	15	0.595068	1.818	0.00691244	0.0183147	0.946	1841	tags=60%, list=14%, signal=70%
KOBAYASHI_RESPONSE_TO_ROMIDEPSIN	16	0.598799	1.81744	0.00493827	0.0183177	0.947	1814	tags=38%, list=14%, signal=43%
PHONG_TNF_RESPONSE_VIA_P38_COMPLETE	195	0.345304	1.81655	0	0.0184248	0.949	2967	tags=38%, list=22%, signal=49%
ELVIDGE_HYPOXIA_UP	146	0.358307	1.81524	0	0.018584	0.952	2596	tags=32%, list=19%, signal=39%
IZADPANAH_STEM_CELL_ADIPOSE_VS_BONE_UP	99	0.385602	1.81463	0	0.0186411	0.954	2195	tags=31%, list=16%, signal=37%
WILCOX_RESPONSE_TO_PROGESTERONE_DN	59	0.42119	1.81398	0	0.0186608	0.955	896	tags=22%, list=7%, signal=24%
KORKOLA_TERATOMA_UP	15	0.594457	1.81277	0.0023753	0.0187816	0.956	2987	tags=60%, list=22%, signal=77%
RODRIGUES_DCC_TARGETS_DN	102	0.377992	1.81264	0	0.0187232	0.956	2208	tags=34%, list=17%, signal=41%
GRANDVAUX_IRF3_TARGETS_UP	15	0.605601	1.81021	0.00733496	0.0190876	0.957	2267	tags=60%, list=17%, signal=72%
SCHAEFFER_PROSTATE_DEVELOPMENT_AND_CANCER_BOX4_DN	23	0.531791	1.80975	0.00257732	0.019141	0.96	2416	tags=57%, list=18%, signal=69%
DORN_ADENOVIRUS_INFECTION_12HR_DN	29	0.501662	1.8085	0.00248756	0.0193104	0.96	754	tags=31%, list=6%, signal=33%
LINDVALL_IMMORTALIZED_BY_TERT_UP	64	0.416959	1.80836	0	0.0192807	0.96	2181	tags=36%, list=16%, signal=43%
WATANABE_RECTAL_CANCER_RADIOTHERAPY_RESPONSIVE_DN	85	0.392289	1.80813	0	0.0192512	0.96	2126	tags=36%, list=16%, signal=43%
LINDSTEDT_DENDRITIC_CELL_MATURATION_B	50	0.435562	1.80658	0	0.0195018	0.965	3078	tags=46%, list=23%, signal=60%
MARKEY_RB1_ACUTE_LOF_DN	178	0.346184	1.80502	0	0.0196708	0.965	2923	tags=36%, list=22%, signal=45%
BURTON_ADIPOGENESIS_2	65	0.408077	1.80462	0.00274725	0.0197042	0.966	2558	tags=35%, list=19%, signal=44%
SCIAN_INVERSED_TARGETS_OF_TP53_AND_TP73_DN	26	0.51117	1.80251	0.00251256	0.0199739	0.966	2379	tags=42%, list=18%, signal=51%
FRIDMAN_SENESCENCE_UP	73	0.412405	1.80157	0	0.0200522	0.967	2923	tags=42%, list=22%, signal=54%
GABRIELY_MIR21_TARGETS	199	0.343961	1.80124	0	0.02002	0.967	2662	tags=31%, list=20%, signal=38%
KYNG_DNA_DAMAGE_BY_4NQO	36	0.469672	1.79958	0.00263852	0.0202344	0.97	1898	tags=33%, list=14%, signal=39%
GRABARCZYK_BCL11B_TARGETS_UP	50	0.434946	1.7981	0.00537634	0.0204368	0.971	2116	tags=32%, list=16%, signal=38%
KIM_LRRC3B_TARGETS	28	0.486202	1.79762	0.00512821	0.0204665	0.971	3562	tags=61%, list=27%, signal=83%
MITSIADES_RESPONSE_TO_APLIDIN_UP	366	0.31936	1.79745	0	0.0204174	0.971	2284	tags=30%, list=17%, signal=35%
CHUANG_OXIDATIVE_STRESS_RESPONSE_UP	24	0.517217	1.79585	0.00742574	0.0206441	0.972	782	tags=29%, list=6%, signal=31%
SMIRNOV_CIRCULATING_ENDOTHELIOCYTES_IN_CANCER_UP	147	0.353475	1.79431	0	0.0209508	0.978	1702	tags=24%, list=13%, signal=28%
SMID_BREAST_CANCER_RELAPSE_IN_BONE_DN	290	0.323574	1.79294	0	0.0211765	0.979	2953	tags=34%, list=22%, signal=42%
DAUER_STAT3_TARGETS_DN	47	0.430787	1.79284	0	0.0211364	0.979	2950	tags=47%, list=22%, signal=60%
ZHU_CMV_ALL_UP	106	0.379255	1.79269	0	0.0211075	0.979	3504	tags=47%, list=26%, signal=63%
RUTELLA_RESPONSE_TO_HGF_UP	370	0.315977	1.79233	0	0.021068	0.979	2925	tags=35%, list=22%, signal=44%
ZHU_CMV_ALL_DN	119	0.368651	1.79195	0	0.0210786	0.98	1113	tags=24%, list=8%, signal=25%
RODRIGUES_NTN1_AND_DCC_TARGETS	30	0.494246	1.79128	0.00519481	0.0211278	0.98	327	tags=27%, list=2%, signal=27%
GENTILE_UV_RESPONSE_CLUSTER_D1	16	0.589322	1.79075	0.00511509	0.0211761	0.981	2552	tags=50%, list=19%, signal=62%
RAMALHO_STEMNESS_UP	158	0.349216	1.79072	0	0.0211148	0.981	2312	tags=32%, list=17%, signal=38%
GENTILE_UV_LOW_DOSE_DN	58	0.41464	1.78991	0.00295858	0.0212408	0.982	2026	tags=31%, list=15%, signal=36%
ABE_VEGFA_TARGETS	19	0.564646	1.78986	0.00488998	0.0211742	0.982	1190	tags=37%, list=9%, signal=40%
NIELSEN_LEIOMYOSARCOMA_UP	16	0.578843	1.7892	0.00477327	0.0212823	0.982	1311	tags=44%, list=10%, signal=48%
GERHOLD_ADIPOGENESIS_DN	61	0.417334	1.78555	0	0.021872	0.986	2921	tags=41%, list=22%, signal=52%
WATANABE_ULCERATIVE_COLITIS_WITH_CANCER_UP	15	0.596685	1.78513	0.00973236	0.0219011	0.986	3662	tags=53%, list=27%, signal=73%
LINDGREN_BLADDER_CANCER_CLUSTER_2A_DN	104	0.369647	1.78469	0	0.0219412	0.986	2606	tags=34%, list=20%, signal=42%
AMIT_EGF_RESPONSE_60_HELA	38	0.462093	1.78393	0.00287356	0.0220191	0.987	2928	tags=47%, list=22%, signal=61%
MMS_MOUSE_LYMPH_HIGH_4HRS_UP	31	0.477589	1.78162	0.0075	0.0223579	0.989	2264	tags=39%, list=17%, signal=47%
KIM_WT1_TARGETS_DN	390	0.307903	1.78154	0	0.0223216	0.989	2248	tags=28%, list=17%, signal=33%
KORKOLA_EMBRYONAL_CARCINOMA_UP	32	0.481947	1.78087	0.00515464	0.0224251	0.99	2628	tags=44%, list=20%, signal=54%
BARRIER_COLON_CANCER_RECURRENCE_UP	34	0.466311	1.78078	0.00515464	0.0223728	0.99	1691	tags=29%, list=13%, signal=34%
TURASHVILI_BREAST_LOBULAR_CARCINOMA_VS_DUCTAL_NORMAL_UP	52	0.423231	1.78043	0	0.022342	0.99	1389	tags=29%, list=10%, signal=32%
GU_PDEF_TARGETS_UP	68	0.403057	1.78004	0	0.0223428	0.99	2588	tags=40%, list=19%, signal=49%
IWANAGA_CARCINOGENESIS_BY_KRAS_UP	110	0.364942	1.77907	0	0.0224757	0.991	1831	tags=25%, list=14%, signal=29%
WOTTON_RUNX_TARGETS_DN	24	0.500489	1.77735	0.00260417	0.0227214	0.992	3566	tags=63%, list=27%, signal=85%
SEIDEN_MET_SIGNALING	18	0.567969	1.77656	0.00980392	0.0228364	0.992	2887	tags=56%, list=22%, signal=71%
BERENJENO_TRANSFORMED_BY_RHOA_FOREVER_UP	16	0.579365	1.77494	0.0120482	0.0231249	0.992	2184	tags=44%, list=16%, signal=52%
BROCKE_APOPTOSIS_REVERSED_BY_IL6	123	0.363863	1.77443	0	0.023175	0.993	1795	tags=28%, list=13%, signal=33%
KOKKINAKIS_METHIONINE_DEPRIVATION_96HR_UP	114	0.362212	1.77438	0	0.0231111	0.993	1570	tags=24%, list=12%, signal=27%
KIM_GLIS2_TARGETS_UP	79	0.394801	1.77322	0	0.023261	0.994	2622	tags=35%, list=20%, signal=44%
NGUYEN_NOTCH1_TARGETS_DN	79	0.387689	1.77247	0	0.0233727	0.994	2046	tags=30%, list=15%, signal=36%
SCIBETTA_KDM5B_TARGETS_DN	70	0.388004	1.77038	0	0.0237051	0.994	2183	tags=36%, list=16%, signal=42%
WANG_TNF_TARGETS	23	0.526059	1.76887	0.0132626	0.0239526	0.994	1366	tags=30%, list=10%, signal=34%
HECKER_IFNB1_TARGETS	73	0.388565	1.76805	0	0.024051	0.994	3192	tags=45%, list=24%, signal=59%
KERLEY_RESPONSE_TO_CISPLATIN_UP	40	0.445243	1.76798	0	0.0239907	0.994	1058	tags=25%, list=8%, signal=27%
KANG_IMMORTALIZED_BY_TERT_DN	100	0.372268	1.76707	0	0.0241136	0.995	1182	tags=23%, list=9%, signal=25%
REACTOME_PROTEIN_FOLDING	35	0.463296	1.7659	0	0.0242829	0.996	2926	tags=51%, list=22%, signal=66%
IKEDA_MIR1_TARGETS_UP	45	0.439786	1.76537	0.00265957	0.0242936	0.996	3048	tags=49%, list=23%, signal=63%
HUPER_BREAST_BASAL_VS_LUMINAL_DN	57	0.414688	1.76428	0	0.0244741	0.996	2035	tags=32%, list=15%, signal=37%
ICHIBA_GRAFT_VERSUS_HOST_DISEASE_D7_UP	89	0.37999	1.76351	0	0.0245592	0.996	2989	tags=45%, list=22%, signal=58%
WINTER_HYPOXIA_METAGENE	211	0.327825	1.76321	0	0.0245489	0.996	2172	tags=29%, list=16%, signal=34%
GENTILE_UV_RESPONSE_CLUSTER_D2	37	0.45525	1.76307	0.00524934	0.0245232	0.996	2115	tags=41%, list=16%, signal=48%
RHEIN_ALL_GLUCOCORTICOID_THERAPY_UP	67	0.406212	1.76304	0	0.0244531	0.996	1510	tags=27%, list=11%, signal=30%
BIOCARTA_LAIR_PATHWAY	16	0.58321	1.76121	0.0141844	0.0247457	0.996	1366	tags=44%, list=10%, signal=49%
WANG_SMARCE1_TARGETS_UP	190	0.333704	1.76119	0	0.0246754	0.996	2257	tags=31%, list=17%, signal=36%
ROZANOV_MMP14_TARGETS_UP	189	0.334497	1.75847	0	0.0250908	0.996	2503	tags=34%, list=19%, signal=41%
CAFFAREL_RESPONSE_TO_THC_UP	25	0.499501	1.7576	0.00492611	0.0251822	0.996	2666	tags=52%, list=20%, signal=65%
KRIEG_KDM3A_TARGETS_NOT_HYPOXIA	125	0.355177	1.7575	0	0.0251213	0.996	2546	tags=34%, list=19%, signal=42%
SCHLOSSER_MYC_TARGETS_AND_SERUM_RESPONSE_DN	43	0.439709	1.7556	0.00484261	0.0254393	0.997	3305	tags=44%, list=25%, signal=59%
TIAN_TNF_SIGNALING_NOT_VIA_NFKB	21	0.526538	1.75382	0.0175879	0.0257875	0.997	606	tags=24%, list=5%, signal=25%
OUELLET_OVARIAN_CANCER_INVASIVE_VS_LMP_UP	108	0.362484	1.75282	0	0.0259304	0.997	3292	tags=47%, list=25%, signal=62%
DORN_ADENOVIRUS_INFECTION_12HR_UP	26	0.48806	1.75121	0.0103359	0.0261398	0.997	2921	tags=42%, list=22%, signal=54%
HOELZEL_NF1_TARGETS_UP	96	0.36811	1.75085	0	0.0261296	0.997	2583	tags=38%, list=19%, signal=46%
PASINI_SUZ12_TARGETS_DN	259	0.319356	1.74729	0	0.0268711	0.997	2220	tags=27%, list=17%, signal=32%
KARAKAS_TGFB1_SIGNALING	18	0.535218	1.74461	0.00797872	0.0274609	0.998	2603	tags=56%, list=20%, signal=69%
ZWANG_CLASS_2_TRANSIENTLY_INDUCED_BY_EGF	37	0.449215	1.74437	0.00530504	0.0274194	0.998	2017	tags=30%, list=15%, signal=35%
REACTOME_EGFR_DOWNREGULATION	22	0.522937	1.74353	0.00251256	0.027498	0.998	3803	tags=55%, list=29%, signal=76%
MODY_HIPPOCAMPUS_NEONATAL	30	0.475416	1.74344	0.0128205	0.0274227	0.998	1984	tags=40%, list=15%, signal=47%
LI_WILMS_TUMOR_ANAPLASTIC_UP	16	0.562855	1.74286	0.00954654	0.0274764	0.998	4020	tags=56%, list=30%, signal=80%
PID_DELTA_NP63_PATHWAY	45	0.425026	1.74285	0.00522193	0.0274063	0.998	1767	tags=29%, list=13%, signal=33%
REACTOME_DOWNREGULATION_OF_TGF_BETA_RECEPTOR_SIGNALING	20	0.530613	1.74248	0.012285	0.0273973	0.998	1953	tags=40%, list=15%, signal=47%
KRIEG_HYPOXIA_VIA_KDM3A	44	0.435253	1.74202	0.00557103	0.0273985	0.998	1818	tags=30%, list=14%, signal=34%
SCHAEFFER_PROSTATE_DEVELOPMENT_6HR_UP	128	0.352602	1.74086	0	0.0275738	0.998	2593	tags=35%, list=19%, signal=43%
BACOLOD_RESISTANCE_TO_ALKYLATING_AGENTS_UP	23	0.512899	1.74006	0.00498753	0.0277021	0.998	2243	tags=48%, list=17%, signal=57%
BASAKI_YBX1_TARGETS_DN	255	0.317633	1.73959	0	0.0277211	0.998	3384	tags=40%, list=25%, signal=53%
HAHTOLA_MYCOSIS_FUNGOIDES_CD4_UP	62	0.405262	1.73563	0.00288184	0.0285713	1	2094	tags=32%, list=16%, signal=38%
BILD_SRC_ONCOGENIC_SIGNATURE	51	0.414383	1.73561	0.008	0.0284994	1	2836	tags=43%, list=21%, signal=55%
KEGG_ECM_RECEPTOR_INTERACTION	80	0.383085	1.73544	0	0.0284932	1	2172	tags=33%, list=16%, signal=39%
MYLLYKANGAS_AMPLIFICATION_HOT_SPOT_23	17	0.552146	1.73269	0.00675676	0.0290619	1	3677	tags=65%, list=28%, signal=89%
BROWNE_HCMV_INFECTION_10HR_DN	49	0.420726	1.73268	0.00542005	0.0289848	1	2197	tags=41%, list=16%, signal=49%
SASSON_RESPONSE_TO_FORSKOLIN_DN	83	0.370209	1.73123	0.00293255	0.0292531	1	1897	tags=30%, list=14%, signal=35%
LAIHO_COLORECTAL_CANCER_SERRATED_UP	103	0.363114	1.73122	0	0.0291806	1	2602	tags=35%, list=20%, signal=43%
DAZARD_RESPONSE_TO_UV_SCC_DN	107	0.361936	1.73118	0	0.0291039	1	2037	tags=31%, list=15%, signal=36%
ZHOU_TNF_SIGNALING_4HR	48	0.414132	1.7311	0	0.0290414	1	1113	tags=27%, list=8%, signal=29%
WIERENGA_STAT5A_TARGETS_GROUP2	46	0.424724	1.73098	0.00536193	0.0289831	1	1747	tags=33%, list=13%, signal=37%
AMIT_SERUM_RESPONSE_120_MCF10A	57	0.401467	1.72901	0	0.0293542	1	1880	tags=28%, list=14%, signal=33%
BIOCARTA_VIP_PATHWAY	24	0.490738	1.72774	0.00961539	0.0296094	1	1950	tags=42%, list=15%, signal=49%
REACTOME_ASSOCIATION_OF_TRIC_CCT_WITH_TARGET_PROTEINS_DURING_BIOSYNTHESIS	19	0.521961	1.72712	0.0141176	0.029658	1	2926	tags=53%, list=22%, signal=67%
AZARE_STAT3_TARGETS	20	0.529228	1.7246	0.015748	0.0301733	1	794	tags=30%, list=6%, signal=32%
HEIDENBLAD_AMPLIFIED_IN_PANCREATIC_CANCER	19	0.547666	1.7239	0.0149626	0.0303255	1	1322	tags=37%, list=10%, signal=41%
LEE_INTRATHYMIC_T_PROGENITOR	18	0.526819	1.722	0.0174564	0.0306158	1	3041	tags=44%, list=23%, signal=58%
NAKAMURA_CANCER_MICROENVIRONMENT_DN	37	0.443175	1.72184	0.00795756	0.0305548	1	3644	tags=38%, list=27%, signal=52%
BRUECKNER_TARGETS_OF_MIRLET7A3_UP	84	0.378689	1.72134	0	0.0306096	1	1511	tags=27%, list=11%, signal=31%
ZHU_SKIL_TARGETS_UP	19	0.537023	1.71867	0.0164319	0.0312582	1	996	tags=42%, list=7%, signal=45%
ZHAN_MULTIPLE_MYELOMA_PR_DN	32	0.461423	1.71862	0.0104167	0.0311916	1	805	tags=22%, list=6%, signal=23%
WANG_LMO4_TARGETS_UP	232	0.318492	1.71678	0	0.031557	1	2149	tags=27%, list=16%, signal=32%
ONDER_CDH1_TARGETS_3_UP	17	0.555461	1.71605	0.00729927	0.0316898	1	4334	tags=65%, list=33%, signal=96%
WOO_LIVER_CANCER_RECURRENCE_UP	99	0.358535	1.71527	0	0.0318244	1	2604	tags=37%, list=20%, signal=46%
BHATI_G2M_ARREST_BY_2METHOXYESTRADIOL_UP	89	0.37017	1.71487	0	0.0318323	1	2619	tags=39%, list=20%, signal=49%
FLOTHO_PEDIATRIC_ALL_THERAPY_RESPONSE_UP	50	0.412955	1.71456	0	0.0318133	1	2557	tags=32%, list=19%, signal=39%
KORKOLA_YOLK_SAC_TUMOR_UP	17	0.549633	1.71445	0.00486618	0.0317509	1	2366	tags=47%, list=18%, signal=57%
ACEVEDO_FGFR1_TARGETS_IN_PROSTATE_CANCER_MODEL_UP	208	0.31878	1.71432	0	0.0317276	1	3067	tags=35%, list=23%, signal=45%
POMEROY_MEDULLOBLASTOMA_DESMOPLASIC_VS_CLASSIC_DN	52	0.415407	1.71422	0.00277008	0.0316698	1	2232	tags=29%, list=17%, signal=35%
RICKMAN_HEAD_AND_NECK_CANCER_C	76	0.384777	1.7126	0	0.031998	1	2223	tags=34%, list=17%, signal=41%
MARTINEZ_RESPONSE_TO_TRABECTEDIN_DN	213	0.323759	1.7115	0	0.0322169	1	3422	tags=40%, list=26%, signal=53%
JECHLINGER_EPITHELIAL_TO_MESENCHYMAL_TRANSITION_UP	69	0.389645	1.70858	0.00852273	0.0328761	1	2923	tags=45%, list=22%, signal=57%
SASSON_RESPONSE_TO_GONADOTROPHINS_DN	82	0.375829	1.70738	0.00294118	0.033065	1	2047	tags=33%, list=15%, signal=39%
BRUECKNER_TARGETS_OF_MIRLET7A3_DN	57	0.399936	1.70668	0	0.0331461	1	1538	tags=28%, list=12%, signal=32%
LEI_MYB_TARGETS	297	0.305836	1.70614	0	0.0332143	1	2604	tags=30%, list=20%, signal=36%
KIM_WT1_TARGETS_12HR_UP	140	0.339897	1.70605	0	0.0331371	1	2984	tags=41%, list=22%, signal=53%
KEGG_LEISHMANIA_INFECTION	62	0.394297	1.70567	0.00282486	0.0332264	1	1582	tags=27%, list=12%, signal=31%
WANG_RECURRENT_LIVER_CANCER_UP	17	0.544844	1.70481	0.0119617	0.0333635	1	2075	tags=35%, list=16%, signal=42%
KONDO_EZH2_TARGETS	167	0.331171	1.70447	0	0.0333755	1	1166	tags=19%, list=9%, signal=21%
TANG_SENESCENCE_TP53_TARGETS_DN	52	0.400994	1.70414	0	0.0333572	1	4228	tags=52%, list=32%, signal=76%
ROVERSI_GLIOMA_LOH_REGIONS	33	0.445079	1.70303	0.00255755	0.033632	1	1394	tags=24%, list=10%, signal=27%
ZHANG_BREAST_CANCER_PROGENITORS_UP	285	0.31047	1.70184	0	0.0338736	1	3652	tags=40%, list=27%, signal=54%
VALK_AML_CLUSTER_9	31	0.455475	1.70161	0.00503778	0.0338463	1	345	tags=16%, list=3%, signal=17%
PODAR_RESPONSE_TO_ADAPHOSTIN_UP	130	0.344186	1.70147	0	0.0338233	1	3501	tags=44%, list=26%, signal=59%
CERVERA_SDHB_TARGETS_2	92	0.355506	1.70133	0	0.0337709	1	1423	tags=24%, list=11%, signal=27%
LE_SKI_TARGETS_UP	17	0.549963	1.69911	0.021164	0.0342869	1	1276	tags=41%, list=10%, signal=45%
MARIADASON_RESPONSE_TO_CURCUMIN_SULINDAC_7	15	0.552539	1.69696	0.022113	0.0348172	1	4081	tags=67%, list=31%, signal=96%
LU_EZH2_TARGETS_DN	269	0.302961	1.69365	0	0.0357278	1	2293	tags=26%, list=17%, signal=31%
ZHU_CMV_24_HR_UP	81	0.372857	1.6928	0.00882353	0.0359638	1	3504	tags=48%, list=26%, signal=65%
LANDIS_ERBB2_BREAST_PRENEOPLASTIC_UP	15	0.557921	1.69107	0.0144928	0.0364924	1	1941	tags=53%, list=15%, signal=62%
SAKAI_CHRONIC_HEPATITIS_VS_LIVER_CANCER_UP	72	0.380043	1.6908	0.00617284	0.0364806	1	3031	tags=44%, list=23%, signal=57%
CASORELLI_ACUTE_PROMYELOCYTIC_LEUKEMIA_UP	152	0.33463	1.68959	0	0.0367698	1	2689	tags=32%, list=20%, signal=40%
HORIUCHI_WTAP_TARGETS_DN	230	0.309771	1.68807	0	0.0371345	1	3370	tags=38%, list=25%, signal=50%
FARMER_BREAST_CANCER_CLUSTER_4	18	0.528141	1.68795	0.00982801	0.037084	1	3656	tags=72%, list=27%, signal=99%
ZIRN_TRETINOIN_RESPONSE_UP	18	0.523818	1.68793	0.0090703	0.0370051	1	1020	tags=33%, list=8%, signal=36%
REACTOME_SPHINGOLIPID_DE_NOVO_BIOSYNTHESIS	16	0.559035	1.68742	0.0115741	0.0370286	1	2199	tags=38%, list=17%, signal=45%
BIOCARTA_ATM_PATHWAY	20	0.514789	1.68729	0.0125628	0.0369827	1	1921	tags=40%, list=14%, signal=47%
ONDER_CDH1_TARGETS_2_DN	420	0.296185	1.68672	0	0.0370553	1	2026	tags=24%, list=15%, signal=27%
HASLINGER_B_CLL_WITH_11Q23_DELETION	21	0.498023	1.6864	0.00755667	0.037046	1	1443	tags=33%, list=11%, signal=37%
SARRIO_EPITHELIAL_MESENCHYMAL_TRANSITION_UP	133	0.337019	1.68526	0.00371747	0.0373013	1	2282	tags=25%, list=17%, signal=30%
BURTON_ADIPOGENESIS_9	76	0.378159	1.68426	0	0.037514	1	1792	tags=29%, list=13%, signal=33%
LIU_PROSTATE_CANCER_DN	346	0.300685	1.68396	0	0.0375318	1	2271	tags=27%, list=17%, signal=32%
CHIBA_RESPONSE_TO_TSA_DN	21	0.501421	1.68233	0.0100503	0.0379188	1	904	tags=24%, list=7%, signal=26%
RICKMAN_TUMOR_DIFFERENTIATED_WELL_VS_POORLY_DN	253	0.309586	1.68096	0	0.0382833	1	2158	tags=28%, list=16%, signal=32%
GARGALOVIC_RESPONSE_TO_OXIDIZED_PHOSPHOLIPIDS_GREEN_UP	15	0.558636	1.68071	0.0210773	0.0382633	1	772	tags=33%, list=6%, signal=35%
BERENJENO_TRANSFORMED_BY_RHOA_UP	427	0.291301	1.68039	0	0.0382831	1	3369	tags=35%, list=25%, signal=46%
DIRMEIER_LMP1_RESPONSE_LATE_UP	53	0.405071	1.67968	0.00557103	0.0384429	1	1921	tags=30%, list=14%, signal=35%
ISSAEVA_MLL2_TARGETS	59	0.38819	1.67944	0.00549451	0.038423	1	621	tags=17%, list=5%, signal=18%
ZHAN_V2_LATE_DIFFERENTIATION_GENES	43	0.423371	1.67915	0.00498753	0.0384229	1	2777	tags=42%, list=21%, signal=53%
KIM_MYCN_AMPLIFICATION_TARGETS_DN	70	0.372446	1.67855	0.00560224	0.0385527	1	1972	tags=30%, list=15%, signal=35%
LANDIS_BREAST_CANCER_PROGRESSION_UP	38	0.432031	1.67839	0.00524934	0.0384892	1	2004	tags=39%, list=15%, signal=46%
HOOI_ST7_TARGETS_DN	80	0.367324	1.67784	0	0.0385753	1	2475	tags=40%, list=19%, signal=49%
BROWNE_HCMV_INFECTION_2HR_UP	34	0.448578	1.67758	0.00793651	0.0385819	1	1683	tags=35%, list=13%, signal=40%
APPIERTO_RESPONSE_TO_FENRETINIDE_UP	30	0.456808	1.67395	0.0078534	0.0395271	1	2312	tags=47%, list=17%, signal=56%
GRAHAM_CML_QUIESCENT_VS_NORMAL_QUIESCENT_DN	44	0.407943	1.67383	0.00526316	0.0394695	1	3046	tags=45%, list=23%, signal=59%
CHIANG_LIVER_CANCER_SUBCLASS_CTNNB1_DN	130	0.337569	1.67349	0	0.0394943	1	1770	tags=27%, list=13%, signal=31%
KOKKINAKIS_METHIONINE_DEPRIVATION_96HR_DN	68	0.380449	1.67199	0.00277008	0.0398779	1	2237	tags=32%, list=17%, signal=39%
DURCHDEWALD_SKIN_CARCINOGENESIS_DN	200	0.317244	1.67185	0	0.0398321	1	2227	tags=29%, list=17%, signal=34%
TIEN_INTESTINE_PROBIOTICS_2HR_DN	74	0.370066	1.67166	0.00303951	0.0398138	1	3168	tags=46%, list=24%, signal=60%
REACTOME_TGF_BETA_RECEPTOR_SIGNALING_ACTIVATES_SMADS	23	0.491468	1.67012	0.0153061	0.040132	1	3518	tags=52%, list=26%, signal=71%
REACTOME_NEPHRIN_INTERACTIONS	17	0.526315	1.66946	0.0154242	0.0402623	1	2061	tags=53%, list=15%, signal=63%
ELVIDGE_HIF1A_AND_HIF2A_TARGETS_DN	87	0.360626	1.66915	0	0.0402699	1	2596	tags=34%, list=19%, signal=43%
BURTON_ADIPOGENESIS_1	29	0.458279	1.66865	0.0122549	0.0403422	1	2686	tags=38%, list=20%, signal=47%
SAGIV_CD24_TARGETS_UP	21	0.496292	1.66732	0.0146341	0.0406408	1	3168	tags=48%, list=24%, signal=62%
RASHI_RESPONSE_TO_IONIZING_RADIATION_2	104	0.348442	1.66699	0.00309597	0.0406556	1	1747	tags=26%, list=13%, signal=30%
LINDGREN_BLADDER_CANCER_HIGH_RECURRENCE	41	0.415656	1.66628	0.00742574	0.0407534	1	1829	tags=41%, list=14%, signal=48%
UZONYI_RESPONSE_TO_LEUKOTRIENE_AND_THROMBIN	34	0.440967	1.66437	0.00542005	0.0412048	1	195	tags=21%, list=1%, signal=21%
GROSS_HYPOXIA_VIA_HIF1A_DN	83	0.3625	1.66304	0.00574713	0.0415714	1	1709	tags=28%, list=13%, signal=32%
YAMAZAKI_TCEB3_TARGETS_UP	146	0.326666	1.66104	0	0.0420572	1	2921	tags=35%, list=22%, signal=44%
HASLINGER_B_CLL_WITH_6Q21_DELETION	18	0.523884	1.65982	0.0125313	0.042438	1	3639	tags=50%, list=27%, signal=69%
NABA_ECM_REGULATORS	182	0.318906	1.65863	0	0.0427206	1	1620	tags=23%, list=12%, signal=26%
HAN_SATB1_TARGETS_DN	377	0.288098	1.65785	0	0.0428628	1	2437	tags=30%, list=18%, signal=36%
GAVIN_FOXP3_TARGETS_CLUSTER_T4	71	0.370526	1.65529	0	0.043561	1	2131	tags=34%, list=16%, signal=40%
BASAKI_YBX1_TARGETS_UP	220	0.312349	1.65482	0	0.0436692	1	2541	tags=28%, list=19%, signal=34%
KIM_WT1_TARGETS_12HR_DN	181	0.315483	1.65395	0	0.043865	1	2305	tags=32%, list=17%, signal=38%
SANA_RESPONSE_TO_IFNG_UP	52	0.395665	1.65365	0.00275482	0.0438528	1	1863	tags=27%, list=14%, signal=31%
SARRIO_EPITHELIAL_MESENCHYMAL_TRANSITION_DN	131	0.332567	1.65244	0	0.0441419	1	2672	tags=33%, list=20%, signal=41%
OSWALD_HEMATOPOIETIC_STEM_CELL_IN_COLLAGEN_GEL_DN	231	0.305454	1.65158	0	0.044408	1	2580	tags=30%, list=19%, signal=36%
LI_WILMS_TUMOR_VS_FETAL_KIDNEY_1_UP	172	0.320782	1.65096	0	0.0445733	1	2068	tags=28%, list=16%, signal=33%
BROWNE_HCMV_INFECTION_6HR_DN	142	0.32777	1.65025	0	0.0447378	1	2536	tags=30%, list=19%, signal=37%
LANDIS_ERBB2_BREAST_TUMORS_65_UP	19	0.506953	1.6497	0.0271605	0.0448538	1	1456	tags=47%, list=11%, signal=53%
MARTINEZ_RESPONSE_TO_TRABECTEDIN	46	0.408673	1.64827	0.00547945	0.0452366	1	2155	tags=33%, list=16%, signal=39%
KEGG_COMPLEMENT_AND_COAGULATION_CASCADES	64	0.374298	1.64611	0.00884956	0.0458583	1	1422	tags=22%, list=11%, signal=24%
GAUSSMANN_MLL_AF4_FUSION_TARGETS_A_UP	131	0.335719	1.646	0	0.0458204	1	2181	tags=30%, list=16%, signal=35%
RUTELLA_RESPONSE_TO_HGF_VS_CSF2RB_AND_IL4_UP	356	0.287301	1.64541	0	0.0458778	1	2538	tags=29%, list=19%, signal=35%
KEGG_HYPERTROPHIC_CARDIOMYOPATHY_HCM	76	0.365608	1.64449	0	0.0461429	1	850	tags=22%, list=6%, signal=24%
BIOCARTA_TID_PATHWAY	19	0.518766	1.6432	0.0213777	0.0465232	1	1374	tags=32%, list=10%, signal=35%
VALK_AML_CLUSTER_11	34	0.442826	1.63938	0.0126904	0.0477498	1	1479	tags=38%, list=11%, signal=43%
CHIARADONNA_NEOPLASTIC_TRANSFORMATION_KRAS_UP	110	0.342918	1.63807	0	0.0481395	1	2281	tags=29%, list=17%, signal=35%
OKUMURA_INFLAMMATORY_RESPONSE_LPS	160	0.32131	1.63678	0	0.0485758	1	2364	tags=28%, list=18%, signal=34%
BREDEMEYER_RAG_SIGNALING_NOT_VIA_ATM_UP	29	0.448507	1.63584	0.0199501	0.0488067	1	3381	tags=52%, list=25%, signal=69%
DORSEY_GAB2_TARGETS	30	0.446076	1.63569	0.0215054	0.0487456	1	1477	tags=33%, list=11%, signal=37%
PID_TNF_PATHWAY	41	0.411524	1.63545	0.00956938	0.0487278	1	1562	tags=29%, list=12%, signal=33%
XU_AKT1_TARGETS_6HR	24	0.458556	1.63526	0.0159574	0.0486918	1	3446	tags=63%, list=26%, signal=84%
ENK_UV_RESPONSE_EPIDERMIS_DN	465	0.281584	1.63491	0	0.0487393	1	2544	tags=27%, list=19%, signal=32%
MCDOWELL_ACUTE_LUNG_INJURY_UP	42	0.408044	1.63481	0.0108696	0.0487045	1	1941	tags=26%, list=15%, signal=31%
BIOCARTA_41BB_PATHWAY	17	0.522574	1.6347	0.0191388	0.0486474	1	2201	tags=41%, list=17%, signal=49%
ALFANO_MYC_TARGETS	211	0.308499	1.63408	0	0.0487652	1	1443	tags=20%, list=11%, signal=22%
INGRAM_SHH_TARGETS_UP	98	0.349308	1.63145	0.00288184	0.0496908	1	2729	tags=37%, list=20%, signal=46%
WAMUNYOKOLI_OVARIAN_CANCER_LMP_DN	137	0.325907	1.63085	0	0.0497528	1	2670	tags=34%, list=20%, signal=42%
SCHAEFFER_PROSTATE_DEVELOPMENT_12HR_UP	91	0.353262	1.63049	0.00293255	0.0497935	1	2604	tags=33%, list=20%, signal=41%
CHIANG_LIVER_CANCER_SUBCLASS_POLYSOMY7_DN	15	0.533063	1.6304	0.0262467	0.0497136	1	1487	tags=47%, list=11%, signal=52%
DAVICIONI_PAX_FOXO1_SIGNATURE_IN_ARMS_DN	17	0.525501	1.63001	0.0206186	0.0497788	1	3457	tags=53%, list=26%, signal=71%
TOOKER_GEMCITABINE_RESISTANCE_DN	111	0.33354	1.62956	0	0.0498262	1	3685	tags=47%, list=28%, signal=64%
KIM_HYPOXIA	22	0.483157	1.62927	0.0262467	0.049813	1	1076	tags=32%, list=8%, signal=35%
SENESE_HDAC1_AND_HDAC2_TARGETS_DN	165	0.31244	1.62709	0	0.0504532	1	2594	tags=30%, list=19%, signal=37%
STEGER_ADIPOGENESIS_DN	23	0.467563	1.62638	0.028103	0.0506246	1	1182	tags=30%, list=9%, signal=33%
ZHOU_INFLAMMATORY_RESPONSE_LIVE_UP	318	0.289554	1.62637	0	0.0505302	1	1593	tags=20%, list=12%, signal=22%
KORKOLA_SEMINOMA_UP	31	0.44009	1.62592	0.00251889	0.0506168	1	1736	tags=29%, list=13%, signal=33%
TERAMOTO_OPN_TARGETS_CLUSTER_7	17	0.513779	1.62586	0.0147783	0.050533	1	1501	tags=29%, list=11%, signal=33%
LU_TUMOR_ANGIOGENESIS_UP	22	0.48143	1.6258	0.026738	0.0504706	1	1501	tags=27%, list=11%, signal=31%
GUILLAUMOND_KLF10_TARGETS_UP	40	0.412437	1.62525	0.0157895	0.0505743	1	1941	tags=38%, list=15%, signal=44%
BOYLAN_MULTIPLE_MYELOMA_D_UP	57	0.383624	1.6252	0.00253807	0.0504877	1	3089	tags=39%, list=23%, signal=50%
TURASHVILI_BREAST_DUCTAL_CARCINOMA_VS_DUCTAL_NORMAL_UP	28	0.461745	1.62519	0.00997506	0.0503878	1	2292	tags=32%, list=17%, signal=39%
YAO_TEMPORAL_RESPONSE_TO_PROGESTERONE_CLUSTER_0	61	0.37658	1.62512	0.00273224	0.0503257	1	1819	tags=30%, list=14%, signal=34%
MANTOVANI_VIRAL_GPCR_SIGNALING_UP	62	0.371674	1.62493	0.00268817	0.0502987	1	2181	tags=31%, list=16%, signal=36%
LIU_CMYB_TARGETS_UP	147	0.324892	1.62444	0	0.0504056	1	1965	tags=26%, list=15%, signal=30%
HAN_JNK_SINGALING_DN	34	0.419288	1.6239	0.0102564	0.0504681	1	3465	tags=50%, list=26%, signal=67%
SENESE_HDAC2_TARGETS_DN	89	0.344257	1.62355	0.00306749	0.0504751	1	2909	tags=37%, list=22%, signal=47%
BIOCARTA_NFKB_PATHWAY	22	0.481618	1.62144	0.0149626	0.0512001	1	2836	tags=55%, list=21%, signal=69%
BRUINS_UVC_RESPONSE_VIA_TP53_GROUP_B	377	0.283508	1.62043	0	0.0515154	1	2085	tags=23%, list=16%, signal=26%
WANG_TUMOR_INVASIVENESS_DN	168	0.31653	1.62037	0	0.0514524	1	2479	tags=29%, list=19%, signal=35%
PLASARI_TGFB1_SIGNALING_VIA_NFIC_1HR_UP	27	0.458851	1.61967	0.0122549	0.0516136	1	2368	tags=48%, list=18%, signal=58%
GAVIN_FOXP3_TARGETS_CLUSTER_P7	61	0.373297	1.6194	0.00882353	0.0515976	1	1913	tags=30%, list=14%, signal=34%
RUTELLA_RESPONSE_TO_CSF2RB_AND_IL4_DN	269	0.291056	1.61689	0	0.0524115	1	2378	tags=28%, list=18%, signal=33%
GRANDVAUX_IRF3_TARGETS_DN	19	0.496457	1.61653	0.0272953	0.0524382	1	1097	tags=32%, list=8%, signal=34%
WANG_CLIM2_TARGETS_DN	134	0.327363	1.61593	0.00325733	0.052573	1	3448	tags=45%, list=26%, signal=60%
LIU_SOX4_TARGETS_UP	111	0.335332	1.61509	0.00316456	0.0527812	1	1614	tags=24%, list=12%, signal=27%
CHEN_LVAD_SUPPORT_OF_FAILING_HEART_UP	94	0.342407	1.61412	0.00304878	0.0530221	1	2205	tags=29%, list=17%, signal=34%
CASTELLANO_NRAS_TARGETS_UP	59	0.378663	1.61405	0.00859599	0.0529441	1	3045	tags=39%, list=23%, signal=50%
DAZARD_UV_RESPONSE_CLUSTER_G2	27	0.456249	1.61334	0.00527705	0.0530531	1	1536	tags=30%, list=12%, signal=33%
KEGG_PATHOGENIC_ESCHERICHIA_COLI_INFECTION	42	0.403475	1.61184	0.0104439	0.0534969	1	1553	tags=31%, list=12%, signal=35%
DITTMER_PTHLH_TARGETS_DN	70	0.361653	1.61017	0.00555556	0.0541284	1	1972	tags=30%, list=15%, signal=35%
TONKS_TARGETS_OF_RUNX1_RUNX1T1_FUSION_ERYTHROCYTE_UP	146	0.320062	1.60916	0	0.0544701	1	2116	tags=30%, list=16%, signal=35%
MCBRYAN_PUBERTAL_TGFB1_TARGETS_DN	62	0.369693	1.60853	0.0114286	0.0546814	1	2631	tags=39%, list=20%, signal=48%
KHETCHOUMIAN_TRIM24_TARGETS_UP	45	0.399538	1.60831	0.021978	0.0546733	1	2894	tags=42%, list=22%, signal=54%
MAHAJAN_RESPONSE_TO_IL1A_UP	78	0.357568	1.60824	0.00284091	0.0545958	1	1899	tags=28%, list=14%, signal=33%
FARMER_BREAST_CANCER_APOCRINE_VS_BASAL	289	0.287581	1.60804	0	0.0545748	1	2568	tags=32%, list=19%, signal=39%
GAURNIER_PSMD4_TARGETS	65	0.366281	1.60788	0.00849858	0.0545375	1	3851	tags=51%, list=29%, signal=71%
WANG_LMO4_TARGETS_DN	206	0.30142	1.60627	0	0.0551022	1	2197	tags=27%, list=16%, signal=31%
IIZUKA_LIVER_CANCER_PROGRESSION_L1_G1_UP	20	0.489863	1.60607	0.0145985	0.0550806	1	210	tags=20%, list=2%, signal=20%
WORSCHECH_TUMOR_REJECTION_UP	47	0.399284	1.60572	0.008	0.0551202	1	2083	tags=38%, list=16%, signal=45%
NAKAYAMA_SOFT_TISSUE_TUMORS_PCA1_UP	71	0.366602	1.60565	0.00920245	0.0550431	1	1899	tags=27%, list=14%, signal=31%
BASSO_HAIRY_CELL_LEUKEMIA_DN	76	0.352936	1.60408	0.00285714	0.0555742	1	2258	tags=33%, list=17%, signal=39%
MCMURRAY_TP53_HRAS_COOPERATION_RESPONSE_UP	22	0.48138	1.60352	0.0142518	0.055674	1	1804	tags=50%, list=14%, signal=58%
BEGUM_TARGETS_OF_PAX3_FOXO1_FUSION_DN	41	0.405078	1.60166	0.0207792	0.0563294	1	1312	tags=34%, list=10%, signal=38%
REICHERT_MITOSIS_LIN9_TARGETS	24	0.467785	1.60094	0.0287206	0.0565635	1	4235	tags=63%, list=32%, signal=91%
MELLMAN_TUT1_TARGETS_DN	42	0.396451	1.6006	0.00819672	0.0565816	1	1004	tags=24%, list=8%, signal=26%
REACTOME_NEGATIVE_REGULATORS_OF_RIG_I_MDA5_SIGNALING	23	0.473306	1.59919	0.0193237	0.0569736	1	3360	tags=65%, list=25%, signal=87%
LI_WILMS_TUMOR_VS_FETAL_KIDNEY_2_DN	49	0.384978	1.59902	0.00802139	0.0569359	1	3656	tags=45%, list=27%, signal=62%
RODRIGUES_NTN1_TARGETS_DN	134	0.318296	1.59886	0	0.0569015	1	1979	tags=26%, list=15%, signal=30%
DER_IFN_GAMMA_RESPONSE_UP	67	0.365053	1.59547	0.0138889	0.0581657	1	1799	tags=30%, list=14%, signal=34%
DUTERTRE_ESTRADIOL_RESPONSE_24HR_DN	364	0.279908	1.59495	0	0.058254	1	2568	tags=30%, list=19%, signal=36%
NUTT_GBM_VS_AO_GLIOMA_UP	45	0.394909	1.59485	0.00793651	0.0581791	1	3507	tags=51%, list=26%, signal=69%
MANALO_HYPOXIA_UP	186	0.306459	1.59225	0	0.0592321	1	1783	tags=25%, list=13%, signal=29%
ZHANG_ANTIVIRAL_RESPONSE_TO_RIBAVIRIN_DN	47	0.395926	1.58998	0.016	0.0601301	1	1561	tags=30%, list=12%, signal=34%
VERNELL_RETINOBLASTOMA_PATHWAY_DN	16	0.514293	1.58856	0.0385542	0.0606146	1	1926	tags=44%, list=14%, signal=51%
BENPORATH_ES_1	290	0.285311	1.58708	0	0.0611268	1	3513	tags=39%, list=26%, signal=52%
TONKS_TARGETS_OF_RUNX1_RUNX1T1_FUSION_HSC_UP	167	0.309341	1.58692	0	0.0610756	1	2981	tags=38%, list=22%, signal=48%
ZHENG_GLIOBLASTOMA_PLASTICITY_DN	49	0.382495	1.58684	0.00872093	0.0610028	1	3537	tags=47%, list=27%, signal=64%
ROY_WOUND_BLOOD_VESSEL_UP	45	0.38704	1.58646	0.0265252	0.0610699	1	1537	tags=29%, list=12%, signal=33%
FARMER_BREAST_CANCER_BASAL_VS_LULMINAL	294	0.284061	1.5859	0	0.0612338	1	2510	tags=30%, list=19%, signal=36%
BILANGES_SERUM_SENSITIVE_VIA_TSC2	28	0.444508	1.5843	0.0184211	0.0618141	1	1437	tags=32%, list=11%, signal=36%
PID_A6B1_A6B4_INTEGRIN_PATHWAY	45	0.391475	1.58413	0.0105263	0.061781	1	2005	tags=31%, list=15%, signal=36%
HONMA_DOCETAXEL_RESISTANCE	29	0.433122	1.58369	0.0244499	0.0618695	1	2220	tags=41%, list=17%, signal=50%
PASQUALUCCI_LYMPHOMA_BY_GC_STAGE_UP	205	0.297629	1.58364	0	0.0617929	1	1989	tags=25%, list=15%, signal=29%
CHICAS_RB1_TARGETS_LOW_SERUM	68	0.361295	1.58251	0.00269542	0.0622301	1	1166	tags=21%, list=9%, signal=22%
GOLDRATH_ANTIGEN_RESPONSE	284	0.286946	1.58246	0	0.0621531	1	2693	tags=29%, list=20%, signal=36%
TONKS_TARGETS_OF_RUNX1_RUNX1T1_FUSION_SUSTAINED_IN_MONOCYTE_UP	20	0.481128	1.5813	0.0127877	0.0625257	1	1183	tags=35%, list=9%, signal=38%
DEBOSSCHER_NFKB_TARGETS_REPRESSED_BY_GLUCOCORTICOIDS	22	0.467918	1.58093	0.0198511	0.0625819	1	1199	tags=32%, list=9%, signal=35%
BOYAULT_LIVER_CANCER_SUBCLASS_G5_DN	22	0.472865	1.57995	0.0213333	0.0629361	1	3239	tags=59%, list=24%, signal=78%
LENAOUR_DENDRITIC_CELL_MATURATION_UP	107	0.32368	1.57957	0.00318471	0.0629954	1	1515	tags=24%, list=11%, signal=27%
PID_RAS_PATHWAY	23	0.465616	1.57954	0.026253	0.0628959	1	2650	tags=48%, list=20%, signal=60%
YAN_ESCAPE_FROM_ANOIKIS	22	0.474492	1.57914	0.0268949	0.0630195	1	3672	tags=59%, list=28%, signal=81%
REACTOME_INTERFERON_GAMMA_SIGNALING	51	0.386639	1.57887	0.00857143	0.0630471	1	3319	tags=47%, list=25%, signal=62%
SABATES_COLORECTAL_ADENOMA_UP	98	0.329164	1.57857	0	0.0630922	1	1987	tags=29%, list=15%, signal=33%
FURUKAWA_DUSP6_TARGETS_PCI35_DN	56	0.37255	1.57794	0.0103093	0.0632479	1	2533	tags=30%, list=19%, signal=37%
VERHAAK_AML_WITH_NPM1_MUTATED_UP	170	0.307165	1.57566	0	0.0642885	1	1866	tags=23%, list=14%, signal=26%
PID_FAK_PATHWAY	54	0.37495	1.57536	0.00539084	0.0643137	1	2622	tags=37%, list=20%, signal=46%
KEGG_NOD_LIKE_RECEPTOR_SIGNALING_PATHWAY	48	0.388865	1.57306	0.00867052	0.0652281	1	1562	tags=31%, list=12%, signal=35%
YANG_BREAST_CANCER_ESR1_BULK_DN	19	0.480664	1.57037	0.025522	0.066419	1	2144	tags=47%, list=16%, signal=56%
BIOCARTA_NDKDYNAMIN_PATHWAY	16	0.505654	1.56635	0.0363196	0.0682533	1	3677	tags=56%, list=28%, signal=78%
SCHLOSSER_MYC_TARGETS_REPRESSED_BY_SERUM	131	0.316652	1.56596	0.00673401	0.0683348	1	3774	tags=46%, list=28%, signal=63%
GROSS_HYPOXIA_VIA_ELK3_AND_HIF1A_UP	109	0.324222	1.56584	0.00334448	0.0682888	1	2686	tags=35%, list=20%, signal=43%
LI_CISPLATIN_RESISTANCE_DN	25	0.449171	1.56478	0.0441177	0.0686887	1	2359	tags=48%, list=18%, signal=58%
MUELLER_METHYLATED_IN_GLIOBLASTOMA	40	0.399285	1.56476	0.0103093	0.0685907	1	1941	tags=30%, list=15%, signal=35%
JIANG_AGING_CEREBRAL_CORTEX_DN	46	0.388678	1.56405	0.0126263	0.0688638	1	1738	tags=33%, list=13%, signal=37%
BOSCO_INTERFERON_INDUCED_ANTIVIRAL_MODULE	55	0.371314	1.56323	0.0058651	0.0691747	1	2355	tags=33%, list=18%, signal=40%
MAHADEVAN_RESPONSE_TO_MP470_DN	18	0.500348	1.56305	0.030303	0.0691427	1	1258	tags=28%, list=9%, signal=31%
LIU_VMYB_TARGETS_UP	112	0.326413	1.56086	0.00334448	0.0701635	1	1965	tags=27%, list=15%, signal=31%
MARSON_FOXP3_TARGETS_STIMULATED_UP	20	0.476774	1.5586	0.0262467	0.0710949	1	3043	tags=55%, list=23%, signal=71%
DELASERNA_MYOD_TARGETS_DN	44	0.385663	1.55827	0.0107817	0.0711613	1	2425	tags=39%, list=18%, signal=47%
TAVOR_CEBPA_TARGETS_UP	46	0.390043	1.5579	0.0205128	0.0712537	1	1396	tags=26%, list=10%, signal=29%
HOFMANN_MYELODYSPLASTIC_SYNDROM_LOW_RISK_DN	27	0.433036	1.55778	0.0356164	0.0711708	1	2382	tags=30%, list=18%, signal=36%
VANTVEER_BREAST_CANCER_ESR1_DN	197	0.294732	1.55643	0	0.0716772	1	3262	tags=41%, list=24%, signal=54%
THUM_SYSTOLIC_HEART_FAILURE_UP	333	0.273646	1.55565	0	0.0719649	1	2829	tags=29%, list=21%, signal=36%
DOANE_BREAST_CANCER_CLASSES_DN	31	0.423092	1.55451	0.0240642	0.0724517	1	1501	tags=32%, list=11%, signal=36%
WANG_TARGETS_OF_MLL_CBP_FUSION_DN	38	0.397891	1.55149	0.0103896	0.0738869	1	1347	tags=24%, list=10%, signal=26%
LINSLEY_MIR16_TARGETS	144	0.307317	1.55111	0	0.0739476	1	2136	tags=29%, list=16%, signal=34%
KANG_DOXORUBICIN_RESISTANCE_UP	48	0.376982	1.5479	0.0161725	0.0755294	1	4353	tags=48%, list=33%, signal=71%
CROONQUIST_IL6_DEPRIVATION_UP	19	0.484534	1.54641	0.0353535	0.0762163	1	1317	tags=32%, list=10%, signal=35%
KRIGE_AMINO_ACID_DEPRIVATION	27	0.437775	1.54616	0.0251256	0.0762262	1	2628	tags=33%, list=20%, signal=41%
REACTOME_SRP_DEPENDENT_COTRANSLATIONAL_PROTEIN_TARGETING_TO_MEMBRANE	97	0.32612	1.54608	0	0.0761388	1	3467	tags=38%, list=26%, signal=51%
LIU_SMARCA4_TARGETS	47	0.371352	1.54605	0.014245	0.0760258	1	2703	tags=38%, list=20%, signal=48%
GAZDA_DIAMOND_BLACKFAN_ANEMIA_PROGENITOR_DN	53	0.371988	1.54582	0.0122324	0.0760292	1	2195	tags=36%, list=16%, signal=43%
PID_VEGFR1_PATHWAY	24	0.449991	1.54571	0.0200501	0.0759593	1	1430	tags=46%, list=11%, signal=51%
VART_KSHV_INFECTION_ANGIOGENIC_MARKERS_UP	146	0.309853	1.54562	0	0.0758755	1	2041	tags=27%, list=15%, signal=31%
EPPERT_CE_HSC_LSC	38	0.404989	1.54517	0.0180879	0.0759641	1	1973	tags=34%, list=15%, signal=40%
SAMOLS_TARGETS_OF_KHSV_MIRNAS_DN	46	0.380424	1.54384	0.0159151	0.0764935	1	1711	tags=35%, list=13%, signal=40%
HOFFMANN_PRE_BI_TO_LARGE_PRE_BII_LYMPHOCYTE_DN	62	0.35333	1.54381	0.0109589	0.0763779	1	2138	tags=34%, list=16%, signal=40%
BANDRES_RESPONSE_TO_CARMUSTIN_MGMT_48HR_UP	18	0.480325	1.54035	0.0470297	0.0781106	1	957	tags=28%, list=7%, signal=30%
LEE_NEURAL_CREST_STEM_CELL_UP	135	0.309281	1.53982	0.00617284	0.0782488	1	3016	tags=39%, list=23%, signal=50%
HUANG_FOXA2_TARGETS_UP	41	0.395472	1.5398	0.0254453	0.0781508	1	2836	tags=41%, list=21%, signal=53%
MOLENAAR_TARGETS_OF_CCND1_AND_CDK4_UP	39	0.390421	1.53973	0.0174564	0.0780705	1	986	tags=18%, list=7%, signal=19%
BEGUM_TARGETS_OF_PAX3_FOXO1_FUSION_UP	55	0.360306	1.53944	0.0131579	0.0780951	1	1243	tags=24%, list=9%, signal=26%
WU_ALZHEIMER_DISEASE_DN	15	0.503573	1.53926	0.0479616	0.0780665	1	2865	tags=47%, list=22%, signal=59%
DOANE_BREAST_CANCER_ESR1_DN	47	0.375165	1.53916	0.016129	0.0780159	1	2376	tags=34%, list=18%, signal=41%
BORLAK_LIVER_CANCER_EGF_UP	52	0.370228	1.53791	0.0141643	0.078658	1	2538	tags=40%, list=19%, signal=50%
YANG_BREAST_CANCER_ESR1_BULK_UP	18	0.479358	1.53777	0.0425	0.0786288	1	2354	tags=44%, list=18%, signal=54%
PECE_MAMMARY_STEM_CELL_UP	118	0.315218	1.53745	0.0060423	0.0786912	1	2479	tags=31%, list=19%, signal=38%
PID_AMB2_NEUTROPHILS_PATHWAY	40	0.390675	1.53735	0.0238095	0.0786196	1	1389	tags=25%, list=10%, signal=28%
LANDIS_ERBB2_BREAST_TUMORS_65_DN	34	0.409036	1.53563	0.0298913	0.0794181	1	2569	tags=35%, list=19%, signal=44%
PID_MYC_ACTIV_PATHWAY	71	0.341912	1.53525	0.0202899	0.0794986	1	3993	tags=44%, list=30%, signal=62%
KINSEY_TARGETS_OF_EWSR1_FLII_FUSION_DN	228	0.285708	1.53476	0	0.0795761	1	1113	tags=17%, list=8%, signal=18%
REACTOME_MHC_CLASS_II_ANTIGEN_PRESENTATION	74	0.337543	1.53449	0.00289017	0.0796452	1	3357	tags=45%, list=25%, signal=59%
OSWALD_HEMATOPOIETIC_STEM_CELL_IN_COLLAGEN_GEL_UP	209	0.285966	1.53444	0	0.0795527	1	1243	tags=20%, list=9%, signal=21%
YU_MYC_TARGETS_UP	34	0.408302	1.53326	0.019802	0.0801138	1	3974	tags=53%, list=30%, signal=75%
GARGALOVIC_RESPONSE_TO_OXIDIZED_PHOSPHOLIPIDS_YELLOW_UP	21	0.465147	1.53293	0.0251889	0.0801564	1	3464	tags=62%, list=26%, signal=84%
HAHTOLA_SEZARY_SYNDROM_UP	89	0.337352	1.5324	0.00847458	0.0802687	1	3510	tags=49%, list=26%, signal=67%
KEGG_PRION_DISEASES	34	0.406843	1.53196	0.0100503	0.0804056	1	1199	tags=26%, list=9%, signal=29%
JIANG_HYPOXIA_NORMAL	249	0.283663	1.53122	0	0.0807331	1	1959	tags=24%, list=15%, signal=28%
KUNINGER_IGF1_VS_PDGFB_TARGETS_DN	31	0.405321	1.53088	0.0412371	0.0807966	1	2826	tags=52%, list=21%, signal=65%
SNIJDERS_AMPLIFIED_IN_HEAD_AND_NECK_TUMORS	32	0.411741	1.5307	0.0361757	0.0807504	1	1182	tags=28%, list=9%, signal=31%
JECHLINGER_EPITHELIAL_TO_MESENCHYMAL_TRANSITION_DN	62	0.351017	1.5306	0.010989	0.0806745	1	2236	tags=29%, list=17%, signal=35%
EPPERT_PROGENITOR	114	0.31476	1.53009	0	0.0808433	1	2777	tags=29%, list=21%, signal=36%
WELCSH_BRCA1_TARGETS_UP	179	0.291923	1.52966	0	0.08092	1	2499	tags=31%, list=19%, signal=38%
IWANAGA_CARCINOGENESIS_BY_KRAS_DN	86	0.329168	1.52726	0.011976	0.0821488	1	2621	tags=33%, list=20%, signal=40%
CERVERA_SDHB_TARGETS_1_UP	77	0.335699	1.52533	0.0140449	0.0830635	1	1122	tags=25%, list=8%, signal=27%
LI_CISPLATIN_RESISTANCE_UP	19	0.465833	1.5251	0.0469136	0.0830676	1	2482	tags=42%, list=19%, signal=52%
HUMMERICH_SKIN_CANCER_PROGRESSION_UP	79	0.334717	1.52402	0.00842697	0.0835131	1	2172	tags=33%, list=16%, signal=39%
FEVR_CTNNB1_TARGETS_DN	411	0.26292	1.52253	0	0.0842866	1	3048	tags=32%, list=23%, signal=40%
GRAESSMANN_APOPTOSIS_BY_SERUM_DEPRIVATION_UP	400	0.262574	1.52109	0	0.0849838	1	2372	tags=25%, list=18%, signal=30%
BEIER_GLIOMA_STEM_CELL_DN	47	0.367246	1.52016	0.0255682	0.0853963	1	2499	tags=34%, list=19%, signal=42%
TURASHVILI_BREAST_DUCTAL_CARCINOMA_VS_LOBULAR_NORMAL_UP	46	0.372706	1.51971	0.0189189	0.0855043	1	2144	tags=30%, list=16%, signal=36%
KAUFFMANN_DNA_REPAIR_GENES	194	0.289491	1.51937	0	0.0856323	1	2913	tags=31%, list=22%, signal=40%
STONER_ESOPHAGEAL_CARCINOGENESIS_UP	27	0.436594	1.5192	0.0362694	0.0855658	1	1968	tags=30%, list=15%, signal=35%
THUM_SYSTOLIC_HEART_FAILURE_DN	149	0.301668	1.51762	0	0.0864269	1	2305	tags=29%, list=17%, signal=35%
BIOCARTA_IL1R_PATHWAY	30	0.414293	1.5175	0.0414508	0.0863457	1	2237	tags=40%, list=17%, signal=48%
NAKAMURA_METASTASIS	35	0.390174	1.5171	0.0355191	0.0864391	1	1357	tags=29%, list=10%, signal=32%
BOYLAN_MULTIPLE_MYELOMA_C_D_DN	199	0.28792	1.5155	0.0104167	0.0872292	1	1973	tags=23%, list=15%, signal=27%
ROZANOV_MMP14_TARGETS_DN	25	0.428862	1.51473	0.0420168	0.0875935	1	3299	tags=48%, list=25%, signal=64%
WHITFIELD_CELL_CYCLE_M_G1	108	0.313181	1.5144	0.00993378	0.0876605	1	3096	tags=38%, list=23%, signal=49%
VANTVEER_BREAST_CANCER_BRCA1_UP	30	0.415695	1.5124	0.0327456	0.0886255	1	2138	tags=40%, list=16%, signal=48%
LEE_METASTASIS_AND_ALTERNATIVE_SPLICING_DN	36	0.393235	1.5124	0.0140845	0.0884935	1	1716	tags=31%, list=13%, signal=35%
DEURIG_T_CELL_PROLYMPHOCYTIC_LEUKEMIA_DN	268	0.278204	1.5119	0	0.0886965	1	2139	tags=27%, list=16%, signal=31%
LEIN_OLIGODENDROCYTE_MARKERS	53	0.358207	1.51035	0.0203488	0.0894209	1	1632	tags=25%, list=12%, signal=28%
RUTELLA_RESPONSE_TO_CSF2RB_AND_IL4_UP	306	0.275557	1.51013	0	0.0894587	1	2925	tags=33%, list=22%, signal=42%
CHANG_CORE_SERUM_RESPONSE_UP	160	0.295311	1.50713	0	0.0912574	1	1975	tags=22%, list=15%, signal=25%
BIOCARTA_P53HYPOXIA_PATHWAY	22	0.446143	1.50606	0.0313253	0.0917894	1	1131	tags=23%, list=8%, signal=25%
MAHAJAN_RESPONSE_TO_IL1A_DN	70	0.342243	1.50555	0.026087	0.0919953	1	2533	tags=34%, list=19%, signal=42%
DASU_IL6_SIGNALING_SCAR_UP	26	0.423044	1.50534	0.0397022	0.0919584	1	226	tags=15%, list=2%, signal=16%
BROWNE_HCMV_INFECTION_14HR_DN	268	0.274572	1.5041	0	0.0925753	1	2740	tags=32%, list=21%, signal=40%
BERTUCCI_MEDULLARY_VS_DUCTAL_BREAST_CANCER_UP	145	0.298297	1.50396	0	0.0925342	1	2312	tags=28%, list=17%, signal=34%
LE_EGR2_TARGETS_UP	90	0.316214	1.5029	0	0.0930742	1	2595	tags=32%, list=19%, signal=40%
BANDRES_RESPONSE_TO_CARMUSTIN_WITHOUT_MGMT_48HR_UP	18	0.477356	1.50103	0.0514019	0.0941219	1	1681	tags=33%, list=13%, signal=38%
ICHIBA_GRAFT_VERSUS_HOST_DISEASE_35D_UP	108	0.314084	1.50049	0.00315457	0.0942965	1	2899	tags=36%, list=22%, signal=46%
PID_HIV_NEF_PATHWAY	35	0.38702	1.49946	0.0238095	0.094818	1	1818	tags=23%, list=14%, signal=26%
BENPORATH_CYCLING_GENES	486	0.255799	1.49897	0	0.0949194	1	2790	tags=29%, list=21%, signal=35%
KEGG_TYPE_I_DIABETES_MELLITUS	40	0.383948	1.49863	0.0225564	0.0949783	1	3728	tags=52%, list=28%, signal=73%
ZHAN_MULTIPLE_MYELOMA_CD2_DN	30	0.405278	1.49814	0.0301508	0.0951396	1	2754	tags=40%, list=21%, signal=50%
REACTOME_LIPOPROTEIN_METABOLISM	26	0.421098	1.49731	0.0248756	0.0955262	1	1386	tags=31%, list=10%, signal=34%
GROSS_HYPOXIA_VIA_ELK3_ONLY_UP	33	0.40287	1.49615	0.0189702	0.0961384	1	3716	tags=55%, list=28%, signal=75%
BORCZUK_MALIGNANT_MESOTHELIOMA_UP	268	0.27396	1.4936	0	0.097584	1	2848	tags=32%, list=21%, signal=40%
YIH_RESPONSE_TO_ARSENITE_C2	17	0.471038	1.49309	0.0571429	0.0977933	1	1327	tags=35%, list=10%, signal=39%
VALK_AML_WITH_CEBPA	32	0.407814	1.49228	0.0402145	0.0981747	1	2437	tags=41%, list=18%, signal=50%
LEE_LIVER_CANCER_E2F1_UP	61	0.349065	1.49176	0.0194444	0.0983145	1	2267	tags=31%, list=17%, signal=37%
HUTTMANN_B_CLL_POOR_SURVIVAL_DN	55	0.349665	1.49148	0.0179028	0.0983498	1	2143	tags=33%, list=16%, signal=39%
SCHLESINGER_METHYLATED_DE_NOVO_IN_CANCER	75	0.332661	1.48867	0.0375335	0.10009	1	2010	tags=31%, list=15%, signal=36%
ZHOU_INFLAMMATORY_RESPONSE_LPS_UP	278	0.269732	1.48857	0	0.100002	1	2391	tags=26%, list=18%, signal=30%
VILIMAS_NOTCH1_TARGETS_UP	47	0.363375	1.48857	0.0238095	0.0998533	1	3108	tags=38%, list=23%, signal=50%
REACTOME_INTERFERON_SIGNALING	138	0.296079	1.48827	0.00320513	0.0998751	1	2757	tags=31%, list=21%, signal=39%
TAKEDA_TARGETS_OF_NUP98_HOXA9_FUSION_16D_UP	124	0.303415	1.48783	0.0159744	0.100017	1	1866	tags=29%, list=14%, signal=33%
RUAN_RESPONSE_TO_TNF_TROGLITAZONE_UP	17	0.476726	1.48779	0.0440098	0.0998971	1	2094	tags=41%, list=16%, signal=49%
BURTON_ADIPOGENESIS_12	21	0.442416	1.48682	0.0457831	0.100353	1	4214	tags=62%, list=32%, signal=90%
PID_AVB3_OPN_PATHWAY	30	0.405327	1.48676	0.0383632	0.100236	1	1818	tags=37%, list=14%, signal=42%
CHESLER_BRAIN_HIGHEST_EXPRESSION	32	0.396696	1.48653	0.0369393	0.100252	1	1703	tags=31%, list=13%, signal=36%
PID_AP1_PATHWAY	68	0.337461	1.48647	0.018018	0.100145	1	1048	tags=19%, list=8%, signal=21%
BENNETT_SYSTEMIC_LUPUS_ERYTHEMATOSUS	26	0.422012	1.48634	0.0493507	0.100099	1	3423	tags=50%, list=26%, signal=67%
MILI_PSEUDOPODIA_CHEMOTAXIS_DN	357	0.260062	1.48573	0	0.100335	1	3030	tags=31%, list=23%, signal=40%
HELLER_HDAC_TARGETS_SILENCED_BY_METHYLATION_UP	405	0.260864	1.48519	0	0.100555	1	1690	tags=20%, list=13%, signal=22%
ZHANG_TLX_TARGETS_DN	64	0.339945	1.4829	0.0106952	0.101911	1	2669	tags=33%, list=20%, signal=41%
HAN_SATB1_TARGETS_UP	320	0.264164	1.48235	0	0.102104	1	3417	tags=37%, list=26%, signal=48%
AMIT_SERUM_RESPONSE_40_MCF10A	28	0.407903	1.48135	0.0465753	0.102684	1	1536	tags=29%, list=12%, signal=32%
HOSHIDA_LIVER_CANCER_SUBCLASS_S1	223	0.278731	1.48052	0	0.103092	1	3119	tags=33%, list=23%, signal=42%
HOWLIN_CITED1_TARGETS_1_DN	34	0.392681	1.47855	0.0342105	0.104286	1	2243	tags=35%, list=17%, signal=42%
YAO_TEMPORAL_RESPONSE_TO_PROGESTERONE_CLUSTER_5	27	0.401361	1.47827	0.0431655	0.104321	1	2142	tags=37%, list=16%, signal=44%
RICKMAN_TUMOR_DIFFERENTIATED_WELL_VS_MODERATELY_DN	82	0.323538	1.4765	0.0141243	0.105415	1	1266	tags=21%, list=10%, signal=23%
KORKOLA_TERATOMA	32	0.395265	1.47519	0.04534	0.106211	1	2538	tags=41%, list=19%, signal=50%
BENPORATH_NOS_TARGETS	129	0.295367	1.47434	0.00677966	0.10673	1	2405	tags=29%, list=18%, signal=36%
MASSARWEH_TAMOXIFEN_RESISTANCE_UP	385	0.258737	1.47403	0	0.106828	1	2143	tags=22%, list=16%, signal=26%
CHEN_ETV5_TARGETS_SERTOLI	20	0.445922	1.47342	0.0472441	0.107127	1	3218	tags=50%, list=24%, signal=66%
JACKSON_DNMT1_TARGETS_UP	73	0.331374	1.47338	0.0172911	0.107	1	1832	tags=30%, list=14%, signal=35%
PID_TOLL_ENDOGENOUS_PATHWAY	21	0.450628	1.47136	0.0680628	0.108313	1	2877	tags=43%, list=22%, signal=55%
REACTOME_RESPONSE_TO_ELEVATED_PLATELET_CYTOSOLIC_CA2_	74	0.333018	1.47099	0.0235988	0.108449	1	2061	tags=28%, list=15%, signal=33%
ROESSLER_LIVER_CANCER_METASTASIS_DN	38	0.378053	1.47066	0.0282776	0.108581	1	1237	tags=29%, list=9%, signal=32%
GARGALOVIC_RESPONSE_TO_OXIDIZED_PHOSPHOLIPIDS_MAGENTA_UP	18	0.460638	1.47005	0.0563726	0.10883	1	3008	tags=44%, list=23%, signal=57%
ZHOU_CELL_CYCLE_GENES_IN_IR_RESPONSE_24HR	97	0.308826	1.46828	0.0143678	0.10998	1	3031	tags=36%, list=23%, signal=46%
TOMLINS_PROSTATE_CANCER_DN	38	0.373718	1.46819	0.0328767	0.10991	1	1867	tags=32%, list=14%, signal=37%
BROWNE_HCMV_INFECTION_4HR_UP	51	0.353622	1.46811	0.0108696	0.109828	1	3871	tags=51%, list=29%, signal=72%
AMUNDSON_RESPONSE_TO_ARSENITE	184	0.281219	1.46739	0.010989	0.110204	1	2374	tags=27%, list=18%, signal=32%
KEGG_NICOTINATE_AND_NICOTINAMIDE_METABOLISM	15	0.48704	1.46717	0.0745192	0.110201	1	567	tags=20%, list=4%, signal=21%
BROWNE_HCMV_INFECTION_8HR_UP	94	0.307231	1.46481	0.0149254	0.111737	1	2523	tags=34%, list=19%, signal=42%
RASHI_RESPONSE_TO_IONIZING_RADIATION_4	46	0.358224	1.46421	0.017094	0.112011	1	2380	tags=35%, list=18%, signal=42%
SHETH_LIVER_CANCER_VS_TXNIP_LOSS_PAM3	60	0.342079	1.46285	0.0178571	0.112872	1	1282	tags=23%, list=10%, signal=26%
NELSON_RESPONSE_TO_ANDROGEN_UP	77	0.324016	1.46252	0.0235294	0.112937	1	2197	tags=29%, list=16%, signal=34%
VERNELL_RETINOBLASTOMA_PATHWAY_UP	53	0.345972	1.46186	0.014245	0.113301	1	3031	tags=38%, list=23%, signal=49%
REACTOME_PEPTIDE_CHAIN_ELONGATION	77	0.320261	1.46062	0.0147059	0.11411	1	3467	tags=38%, list=26%, signal=51%
GAVIN_FOXP3_TARGETS_CLUSTER_P2	58	0.344495	1.4606	0.0289017	0.113959	1	2284	tags=31%, list=17%, signal=37%
WESTON_VEGFA_TARGETS_3HR	69	0.333421	1.46059	0.0172414	0.113811	1	1538	tags=25%, list=12%, signal=28%
INGA_TP53_TARGETS	16	0.467561	1.4605	0.064433	0.113712	1	641	tags=25%, list=5%, signal=26%
LABBE_TGFB1_TARGETS_UP	84	0.317228	1.45949	0.011976	0.114284	1	3237	tags=36%, list=24%, signal=47%
NAM_FXYD5_TARGETS_DN	16	0.468371	1.45838	0.0631313	0.114966	1	3153	tags=69%, list=24%, signal=90%
WANG_RESPONSE_TO_FORSKOLIN_UP	19	0.452535	1.45799	0.0566038	0.115063	1	2851	tags=37%, list=21%, signal=47%
ONDER_CDH1_TARGETS_1_UP	117	0.297217	1.45735	0.00900901	0.115377	1	2832	tags=33%, list=21%, signal=42%
WIELAND_UP_BY_HBV_INFECTION	91	0.310241	1.45468	0.0145349	0.117217	1	2987	tags=36%, list=22%, signal=46%
KEGG_ARRHYTHMOGENIC_RIGHT_VENTRICULAR_CARDIOMYOPATHY_ARVC	68	0.335085	1.45442	0.0144092	0.117274	1	2172	tags=34%, list=16%, signal=40%
NOUSHMEHR_GBM_SILENCED_BY_METHYLATION	32	0.386992	1.45417	0.0445026	0.117288	1	2228	tags=38%, list=17%, signal=45%
MASRI_RESISTANCE_TO_TAMOXIFEN_AND_AROMATASE_INHIBITORS_DN	19	0.447632	1.45352	0.075	0.117645	1	267	tags=16%, list=2%, signal=16%
MASSARWEH_RESPONSE_TO_ESTRADIOL	53	0.34904	1.45314	0.0188172	0.117774	1	2348	tags=28%, list=18%, signal=34%
WILLIAMS_ESR1_TARGETS_UP	22	0.439394	1.45309	0.0625	0.117639	1	2469	tags=45%, list=19%, signal=56%
KORKOLA_YOLK_SAC_TUMOR	47	0.356774	1.45275	0.0319149	0.117684	1	808	tags=19%, list=6%, signal=20%
REACTOME_EXTRACELLULAR_MATRIX_ORGANIZATION	77	0.324098	1.45082	0.022792	0.118927	1	1300	tags=21%, list=10%, signal=23%
LANG_MYB_FAMILY_TARGETS	25	0.410462	1.45075	0.0530303	0.118815	1	2998	tags=48%, list=23%, signal=62%
VANTVEER_BREAST_CANCER_METASTASIS_DN	94	0.302402	1.45065	0.00613497	0.118731	1	2678	tags=28%, list=20%, signal=34%
MORI_IMMATURE_B_LYMPHOCYTE_DN	78	0.312707	1.4503	0.00869565	0.118843	1	2916	tags=33%, list=22%, signal=42%
PID_IL1_PATHWAY	30	0.400428	1.45013	0.044335	0.11884	1	3646	tags=57%, list=27%, signal=78%
REACTOME_TRANSCRIPTIONAL_ACTIVITY_OF_SMAD2_SMAD3_SMAD4_HETEROTRIMER	33	0.384342	1.45006	0.0414508	0.118708	1	3926	tags=61%, list=29%, signal=86%
NEMETH_INFLAMMATORY_RESPONSE_LPS_UP	80	0.320757	1.44958	0.0172414	0.118918	1	2505	tags=28%, list=19%, signal=34%
TSUNODA_CISPLATIN_RESISTANCE_DN	44	0.355334	1.4494	0.0356164	0.1189	1	1237	tags=25%, list=9%, signal=27%
LIN_SILENCED_BY_TUMOR_MICROENVIRONMENT	83	0.313662	1.44933	0.0144928	0.118805	1	832	tags=17%, list=6%, signal=18%
BOYAULT_LIVER_CANCER_SUBCLASS_G1_DN	36	0.378519	1.44772	0.0294906	0.119928	1	1019	tags=22%, list=8%, signal=24%
ENGELMANN_CANCER_PROGENITORS_UP	40	0.367629	1.44747	0.0376344	0.119951	1	1183	tags=25%, list=9%, signal=27%
STREICHER_LSM1_TARGETS_DN	16	0.468742	1.44745	0.100239	0.119795	1	2376	tags=38%, list=18%, signal=46%
TURASHVILI_BREAST_DUCTAL_CARCINOMA_VS_DUCTAL_NORMAL_DN	144	0.283964	1.44588	0.00649351	0.120858	1	2596	tags=28%, list=19%, signal=34%
HESS_TARGETS_OF_HOXA9_AND_MEIS1_DN	68	0.325444	1.44543	0.0218579	0.121038	1	2672	tags=35%, list=20%, signal=44%
MCBRYAN_PUBERTAL_TGFB1_TARGETS_UP	154	0.282271	1.44479	0.0137931	0.121391	1	2683	tags=32%, list=20%, signal=40%
DAZARD_UV_RESPONSE_CLUSTER_G24	26	0.4068	1.44475	0.0456853	0.121245	1	1841	tags=31%, list=14%, signal=36%
GREGORY_SYNTHETIC_LETHAL_WITH_IMATINIB	117	0.292457	1.44413	0.00925926	0.121529	1	1800	tags=26%, list=14%, signal=29%
RUTELLA_RESPONSE_TO_HGF_VS_CSF2RB_AND_IL4_DN	219	0.26751	1.44363	0	0.121759	1	2851	tags=32%, list=21%, signal=39%
SWEET_LUNG_CANCER_KRAS_DN	375	0.251719	1.4429	0	0.122179	1	1810	tags=21%, list=14%, signal=24%
SESTO_RESPONSE_TO_UV_C0	98	0.30254	1.44278	0.00920245	0.122121	1	3008	tags=38%, list=23%, signal=48%
LANDIS_BREAST_CANCER_PROGRESSION_DN	63	0.330453	1.44109	0.0387812	0.123419	1	1983	tags=27%, list=15%, signal=32%
SASAKI_ADULT_T_CELL_LEUKEMIA	158	0.284173	1.44023	0	0.123906	1	2298	tags=25%, list=17%, signal=30%
WALLACE_PROSTATE_CANCER_RACE_UP	259	0.260227	1.44018	0	0.123775	1	3095	tags=33%, list=23%, signal=42%
CHIARETTI_T_ALL_RELAPSE_PROGNOSIS	17	0.466363	1.44018	0.0719603	0.123611	1	4340	tags=65%, list=33%, signal=96%
BOYLAN_MULTIPLE_MYELOMA_PCA1_UP	84	0.311044	1.43981	0.0225989	0.1237	1	1941	tags=23%, list=15%, signal=26%
KEGG_FOCAL_ADHESION	182	0.273745	1.43856	0	0.124552	1	2077	tags=26%, list=16%, signal=30%
LEE_LIVER_CANCER_ACOX1_UP	59	0.332556	1.43806	0.028133	0.124756	1	2228	tags=31%, list=17%, signal=36%
BIOCARTA_IL17_PATHWAY	16	0.466943	1.43759	0.0567901	0.124935	1	1121	tags=25%, list=8%, signal=27%
BIOCARTA_DEATH_PATHWAY	31	0.385048	1.43744	0.0541237	0.124894	1	1818	tags=23%, list=14%, signal=26%
PID_TAP63_PATHWAY	49	0.347239	1.4371	0.0383632	0.125026	1	1562	tags=27%, list=12%, signal=30%
CHIARADONNA_NEOPLASTIC_TRANSFORMATION_KRAS_CDC25_DN	47	0.349293	1.43676	0.0422164	0.125139	1	2162	tags=30%, list=16%, signal=35%
ST_WNT_CA2_CYCLIC_GMP_PATHWAY	20	0.431743	1.43631	0.060241	0.125324	1	1322	tags=30%, list=10%, signal=33%
RICKMAN_HEAD_AND_NECK_CANCER_B	33	0.382848	1.43508	0.0373333	0.126119	1	2810	tags=36%, list=21%, signal=46%
MENSE_HYPOXIA_UP	67	0.331238	1.43479	0.0290698	0.12618	1	2475	tags=36%, list=19%, signal=44%
GAUSSMANN_MLL_AF4_FUSION_TARGETS_G_DN	26	0.406364	1.43471	0.0707071	0.126089	1	1833	tags=38%, list=14%, signal=45%
ZHOU_INFLAMMATORY_RESPONSE_FIMA_UP	340	0.254592	1.43393	0.00442478	0.126575	1	1631	tags=19%, list=12%, signal=21%
REACTOME_TAK1_ACTIVATES_NFKB_BY_PHOSPHORYLATION_AND_ACTIVATION_OF_IKKS_COMPLEX	17	0.449819	1.43368	0.0763547	0.126642	1	2237	tags=47%, list=17%, signal=56%
PID_ERBB1_INTERNALIZATION_PATHWAY	38	0.364715	1.43358	0.040201	0.126528	1	3554	tags=42%, list=27%, signal=57%
REACTOME_RIG_I_MDA5_MEDIATED_INDUCTION_OF_IFN_ALPHA_BETA_PATHWAYS	63	0.337275	1.4316	0.0391061	0.127938	1	3730	tags=51%, list=28%, signal=70%
MARTINEZ_TP53_TARGETS_UP	468	0.244523	1.43085	0	0.128335	1	2071	tags=22%, list=16%, signal=25%
HALMOS_CEBPA_TARGETS_UP	49	0.348887	1.43079	0.0541311	0.12821	1	1536	tags=27%, list=12%, signal=30%
FOURNIER_ACINAR_DEVELOPMENT_LATE_DN	20	0.442217	1.43041	0.0617849	0.128378	1	2568	tags=45%, list=19%, signal=56%
LUI_THYROID_CANCER_PAX8_PPARG_UP	39	0.361438	1.43029	0.0470914	0.128303	1	1344	tags=26%, list=10%, signal=28%
REACTOME_TRANSLATION	122	0.297104	1.42916	0.015674	0.129046	1	3467	tags=38%, list=26%, signal=51%
REACTOME_3_UTR_MEDIATED_TRANSLATIONAL_REGULATION	85	0.307893	1.42895	0.0257235	0.12906	1	3467	tags=36%, list=26%, signal=49%
CHEN_LVAD_SUPPORT_OF_FAILING_HEART_DN	41	0.359216	1.42864	0.0502793	0.129133	1	1252	tags=22%, list=9%, signal=24%
ZHONG_RESPONSE_TO_AZACITIDINE_AND_TSA_DN	50	0.33525	1.42856	0.0446194	0.129033	1	3102	tags=42%, list=23%, signal=55%
JAEGER_METASTASIS_UP	42	0.359487	1.42836	0.0399002	0.129048	1	2730	tags=33%, list=20%, signal=42%
REACTOME_CLASS_I_MHC_MEDIATED_ANTIGEN_PROCESSING_PRESENTATION	186	0.272138	1.42804	0.00740741	0.129129	1	2980	tags=33%, list=22%, signal=42%
FULCHER_INFLAMMATORY_RESPONSE_LECTIN_VS_LPS_DN	331	0.255274	1.42673	0	0.130024	1	2134	tags=24%, list=16%, signal=28%
SMIRNOV_RESPONSE_TO_IR_2HR_DN	49	0.34904	1.42605	0.0359897	0.130475	1	2629	tags=35%, list=20%, signal=43%
DAVICIONI_TARGETS_OF_PAX_FOXO1_FUSIONS_DN	59	0.3289	1.42594	0.0254958	0.130416	1	3521	tags=42%, list=26%, signal=57%
NAKAMURA_TUMOR_ZONE_PERIPHERAL_VS_CENTRAL_DN	421	0.24758	1.42553	0	0.130653	1	2380	tags=25%, list=18%, signal=29%
WANG_IMMORTALIZED_BY_HOXA9_AND_MEIS1_UP	25	0.404465	1.42547	0.0623306	0.130525	1	2984	tags=44%, list=22%, signal=57%
POOLA_INVASIVE_BREAST_CANCER_DN	124	0.288363	1.42409	0.00316456	0.131446	1	2724	tags=30%, list=20%, signal=37%
ZIRN_TRETINOIN_RESPONSE_WT1_UP	18	0.449613	1.42404	0.0851064	0.131311	1	1935	tags=39%, list=15%, signal=45%
KANG_AR_TARGETS_DN	18	0.445288	1.42374	0.0707547	0.13142	1	1501	tags=39%, list=11%, signal=44%
REACTOME_FACTORS_INVOLVED_IN_MEGAKARYOCYTE_DEVELOPMENT_AND_PLATELET_PRODUCTION	103	0.300558	1.42312	0.0181269	0.131769	1	3554	tags=39%, list=27%, signal=53%
GENTILE_UV_RESPONSE_CLUSTER_D5	31	0.384035	1.42285	0.0506024	0.131812	1	2925	tags=42%, list=22%, signal=54%
REACTOME_SMAD2_SMAD3_SMAD4_HETEROTRIMER_REGULATES_TRANSCRIPTION	23	0.415166	1.42271	0.0392157	0.131795	1	3926	tags=65%, list=29%, signal=92%
GENTILE_RESPONSE_CLUSTER_D3	58	0.324148	1.42233	0.0401146	0.131959	1	3809	tags=47%, list=29%, signal=65%
PID_INTEGRIN_A4B1_PATHWAY	29	0.386419	1.42144	0.0492228	0.132537	1	1501	tags=28%, list=11%, signal=31%
JOHANSSON_GLIOMAGENESIS_BY_PDGFB_UP	49	0.350072	1.42138	0.0396601	0.132404	1	2499	tags=33%, list=19%, signal=40%
MURAKAMI_UV_RESPONSE_6HR_UP	34	0.371169	1.42125	0.0445026	0.132353	1	1938	tags=32%, list=15%, signal=38%
REACTOME_REGULATION_OF_KIT_SIGNALING	15	0.46803	1.42119	0.0723192	0.132222	1	1915	tags=47%, list=14%, signal=54%
AMUNDSON_GENOTOXIC_SIGNATURE	92	0.309362	1.42022	0.0271084	0.132898	1	2179	tags=26%, list=16%, signal=31%
YANG_BCL3_TARGETS_UP	271	0.253697	1.41925	0.00434783	0.133553	1	2579	tags=27%, list=19%, signal=33%
GHO_ATF5_TARGETS_DN	15	0.481071	1.41919	0.0757946	0.13341	1	3507	tags=53%, list=26%, signal=72%
NATSUME_RESPONSE_TO_INTERFERON_BETA_UP	65	0.328113	1.41906	0.03207	0.133329	1	3680	tags=48%, list=28%, signal=66%
RHEIN_ALL_GLUCOCORTICOID_THERAPY_DN	330	0.251993	1.41773	0	0.134265	1	2314	tags=25%, list=17%, signal=29%
PID_IL23_PATHWAY	34	0.380517	1.41699	0.0558511	0.134663	1	2201	tags=38%, list=17%, signal=46%
WINTER_HYPOXIA_UP	66	0.324682	1.41574	0.0168539	0.135519	1	2585	tags=36%, list=19%, signal=45%
KANNAN_TP53_TARGETS_UP	52	0.339289	1.41456	0.0417827	0.136445	1	1597	tags=23%, list=12%, signal=26%
BROWNE_HCMV_INFECTION_18HR_UP	162	0.277082	1.41421	0.0145985	0.1366	1	2603	tags=30%, list=20%, signal=37%
BENPORATH_ES_CORE_NINE_CORRELATED	95	0.301904	1.41416	0.0251572	0.136468	1	2990	tags=37%, list=22%, signal=47%
RUIZ_TNC_TARGETS_UP	138	0.281734	1.41396	0.013468	0.136463	1	3319	tags=37%, list=25%, signal=49%
KOKKINAKIS_METHIONINE_DEPRIVATION_48HR_DN	60	0.322262	1.41368	0.0356083	0.136527	1	2923	tags=35%, list=22%, signal=45%
PID_IL27_PATHWAY	25	0.409039	1.41343	0.0798969	0.136552	1	1374	tags=24%, list=10%, signal=27%
YAO_TEMPORAL_RESPONSE_TO_PROGESTERONE_CLUSTER_9	59	0.323839	1.41342	0.0325203	0.136386	1	2923	tags=32%, list=22%, signal=41%
JIANG_HYPOXIA_CANCER	62	0.323357	1.41325	0.032967	0.136358	1	2528	tags=29%, list=19%, signal=36%
JI_RESPONSE_TO_FSH_DN	54	0.331786	1.41324	0.0437318	0.136192	1	1198	tags=22%, list=9%, signal=24%
ABRAHAM_ALPC_VS_MULTIPLE_MYELOMA_UP	26	0.39796	1.41323	0.078125	0.136025	1	1182	tags=19%, list=9%, signal=21%
ZHAN_MULTIPLE_MYELOMA_LB_DN	30	0.380955	1.41317	0.0507614	0.135908	1	2083	tags=33%, list=16%, signal=39%
LENAOUR_DENDRITIC_CELL_MATURATION_DN	119	0.29099	1.41296	0.0288462	0.135924	1	472	tags=13%, list=4%, signal=13%
VECCHI_GASTRIC_CANCER_EARLY_DN	260	0.257219	1.41233	0	0.1363	1	2507	tags=28%, list=19%, signal=34%
WANG_BARRETTS_ESOPHAGUS_AND_ESOPHAGUS_CANCER_UP	22	0.423558	1.41	0.0658537	0.138298	1	2440	tags=36%, list=18%, signal=44%
HELLER_SILENCED_BY_METHYLATION_DN	93	0.306256	1.40961	0.0158228	0.13848	1	2686	tags=30%, list=20%, signal=37%
SERVITJA_ISLET_HNF1A_TARGETS_UP	146	0.282307	1.40947	0.0133779	0.138442	1	2996	tags=36%, list=22%, signal=46%
REACTOME_SIGNALING_BY_TGF_BETA_RECEPTOR_COMPLEX	55	0.333312	1.40908	0.0412371	0.138616	1	4118	tags=53%, list=31%, signal=76%
SWEET_KRAS_TARGETS_UP	73	0.319747	1.4083	0.0402299	0.139116	1	2233	tags=30%, list=17%, signal=36%
PUJANA_XPRSS_INT_NETWORK	148	0.27801	1.40734	0.013245	0.139786	1	3369	tags=36%, list=25%, signal=47%
NAGASHIMA_NRG1_SIGNALING_DN	47	0.341129	1.4071	0.0406504	0.139852	1	2008	tags=36%, list=15%, signal=42%
PID_INTEGRIN_A9B1_PATHWAY	22	0.41892	1.40709	0.0811518	0.139682	1	1620	tags=36%, list=12%, signal=41%
KEGG_VIRAL_MYOCARDITIS	67	0.315701	1.4069	0.028169	0.139672	1	3154	tags=36%, list=24%, signal=47%
GARY_CD5_TARGETS_DN	315	0.253291	1.40657	0.00411523	0.139803	1	2742	tags=30%, list=21%, signal=37%
DUTTA_APOPTOSIS_VIA_NFKB	29	0.385027	1.40638	0.0812325	0.139774	1	1031	tags=21%, list=8%, signal=22%
KIM_MYC_AMPLIFICATION_TARGETS_DN	60	0.323805	1.40632	0.0433604	0.13967	1	2677	tags=35%, list=20%, signal=44%
REACTOME_TRAF6_MEDIATED_NFKB_ACTIVATION	19	0.434057	1.40627	0.087886	0.139529	1	1743	tags=37%, list=13%, signal=42%
BROWNE_HCMV_INFECTION_16HR_UP	198	0.268999	1.40539	0.00401606	0.140133	1	2449	tags=28%, list=18%, signal=34%
REACTOME_DEGRADATION_OF_THE_EXTRACELLULAR_MATRIX	27	0.393717	1.40537	0.0755668	0.139969	1	1242	tags=26%, list=9%, signal=29%
PEDRIOLI_MIR31_TARGETS_DN	278	0.254292	1.40504	0.00421941	0.140082	1	1845	tags=22%, list=14%, signal=25%
ZHAN_MULTIPLE_MYELOMA_CD1_AND_CD2_UP	56	0.336781	1.40471	0.0405797	0.140265	1	2099	tags=30%, list=16%, signal=36%
YAMASHITA_METHYLATED_IN_PROSTATE_CANCER	47	0.348186	1.4046	0.0403226	0.140203	1	1854	tags=30%, list=14%, signal=34%
HEDENFALK_BREAST_CANCER_BRACX_DN	17	0.451091	1.40415	0.091133	0.140441	1	2510	tags=47%, list=19%, signal=58%
KEGG_DILATED_CARDIOMYOPATHY	82	0.303141	1.40398	0.0269461	0.140439	1	916	tags=20%, list=7%, signal=21%
STEARMAN_TUMOR_FIELD_EFFECT_UP	30	0.387701	1.40396	0.0626632	0.140288	1	2989	tags=53%, list=22%, signal=69%
GRAHAM_CML_QUIESCENT_VS_NORMAL_QUIESCENT_UP	79	0.305041	1.40384	0.0235988	0.14022	1	2678	tags=33%, list=20%, signal=41%
DACOSTA_ERCC3_ALLELE_XPCS_VS_TTD_DN	33	0.373819	1.40307	0.0617577	0.140717	1	1504	tags=36%, list=11%, signal=41%
SESTO_RESPONSE_TO_UV_C8	69	0.319203	1.40273	0.0286533	0.140861	1	1489	tags=22%, list=11%, signal=24%
WIKMAN_ASBESTOS_LUNG_CANCER_UP	17	0.455281	1.40107	0.0854503	0.14212	1	2954	tags=41%, list=22%, signal=53%
FIGUEROA_AML_METHYLATION_CLUSTER_4_UP	73	0.3162	1.40066	0.0492754	0.142269	1	1975	tags=27%, list=15%, signal=32%
WIERENGA_STAT5A_TARGETS_UP	151	0.272241	1.39956	0.0101351	0.143112	1	2538	tags=28%, list=19%, signal=34%
LIU_TARGETS_OF_VMYB_VS_CMYB_DN	33	0.368392	1.39944	0.0748792	0.14302	1	1914	tags=27%, list=14%, signal=32%
COLINA_TARGETS_OF_4EBP1_AND_4EBP2	289	0.251673	1.3991	0.00409836	0.143116	1	2693	tags=28%, list=20%, signal=35%
GARGALOVIC_RESPONSE_TO_OXIDIZED_PHOSPHOLIPIDS_TURQUOISE_UP	53	0.332165	1.3985	0.0617284	0.143462	1	1073	tags=21%, list=8%, signal=22%
EHLERS_ANEUPLOIDY_UP	31	0.383852	1.39847	0.0792839	0.143313	1	3255	tags=45%, list=24%, signal=60%
KEGG_SPLICEOSOME	84	0.305086	1.39839	0.0272109	0.143202	1	2096	tags=26%, list=16%, signal=31%
PLASARI_TGFB1_SIGNALING_VIA_NFIC_10HR_DN	25	0.388738	1.39813	0.074813	0.14325	1	2167	tags=44%, list=16%, signal=52%
BHAT_ESR1_TARGETS_VIA_AKT1_DN	62	0.322718	1.39741	0.0481928	0.143767	1	2090	tags=29%, list=16%, signal=34%
REACTOME_TRANSPORT_TO_THE_GOLGI_AND_SUBSEQUENT_MODIFICATION	31	0.381046	1.39734	0.0738916	0.143648	1	2393	tags=39%, list=18%, signal=47%
HOELZEL_NF1_TARGETS_DN	68	0.318784	1.39653	0.031339	0.144184	1	2353	tags=34%, list=18%, signal=41%
MARTINEZ_RB1_AND_TP53_TARGETS_UP	473	0.24187	1.39365	0	0.146595	1	2071	tags=22%, list=16%, signal=26%
PEDERSEN_METASTASIS_BY_ERBB2_ISOFORM_6	21	0.42617	1.39356	0.0813397	0.146506	1	2756	tags=52%, list=21%, signal=66%
SHEPARD_BMYB_TARGETS	55	0.328659	1.39248	0.0422961	0.147291	1	3234	tags=38%, list=24%, signal=50%
REACTOME_INTEGRIN_CELL_SURFACE_INTERACTIONS	74	0.30944	1.39233	0.0262391	0.14728	1	904	tags=19%, list=7%, signal=20%
ZHENG_IL22_SIGNALING_UP	41	0.355173	1.39199	0.0633245	0.147406	1	1199	tags=22%, list=9%, signal=24%
TURASHVILI_BREAST_LOBULAR_CARCINOMA_VS_LOBULAR_NORMAL_DN	56	0.329247	1.39029	0.0535211	0.14883	1	2614	tags=34%, list=20%, signal=42%
KEGG_RIBOSOME	78	0.30736	1.39013	0.0453172	0.148823	1	3467	tags=37%, list=26%, signal=50%
BOYAULT_LIVER_CANCER_SUBCLASS_G6_DN	19	0.429637	1.38972	0.0799032	0.149056	1	1492	tags=21%, list=11%, signal=24%
KRIEG_HYPOXIA_NOT_VIA_KDM3A	500	0.236872	1.38934	0	0.149218	1	2264	tags=24%, list=17%, signal=28%
PID_GLYPICAN_1PATHWAY	25	0.389205	1.38927	0.0620347	0.149101	1	1067	tags=24%, list=8%, signal=26%
SATO_SILENCED_BY_METHYLATION_IN_PANCREATIC_CANCER_1	382	0.244073	1.38833	0	0.149792	1	1262	tags=17%, list=9%, signal=18%
MATSUDA_NATURAL_KILLER_DIFFERENTIATION	372	0.242855	1.38709	0	0.150767	1	1840	tags=20%, list=14%, signal=22%
LEE_AGING_MUSCLE_UP	40	0.357009	1.38655	0.0638889	0.15109	1	3614	tags=48%, list=27%, signal=65%
WILCOX_RESPONSE_TO_PROGESTERONE_UP	129	0.281028	1.38626	0.012945	0.151192	1	2768	tags=30%, list=21%, signal=38%
DOANE_BREAST_CANCER_CLASSES_UP	61	0.316026	1.38543	0.0514286	0.151812	1	1040	tags=20%, list=8%, signal=21%
LEE_LIVER_CANCER_DENA_UP	59	0.322254	1.38539	0.0424403	0.15167	1	2877	tags=39%, list=22%, signal=50%
ALCALAY_AML_BY_NPM1_LOCALIZATION_UP	126	0.28113	1.38505	0.011976	0.151767	1	2505	tags=26%, list=19%, signal=32%
DOUGLAS_BMI1_TARGETS_DN	209	0.260192	1.38474	0.00401606	0.151892	1	2155	tags=24%, list=16%, signal=29%
REACTOME_ANTIGEN_PRESENTATION_FOLDING_ASSEMBLY_AND_PEPTIDE_LOADING_OF_CLASS_I_MHC	18	0.438791	1.38445	0.0989583	0.151986	1	2197	tags=39%, list=16%, signal=47%
GRADE_COLON_VS_RECTAL_CANCER_UP	28	0.381186	1.38437	0.0653753	0.151887	1	3258	tags=46%, list=24%, signal=61%
POOLA_INVASIVE_BREAST_CANCER_UP	255	0.25236	1.38366	0.00438597	0.152377	1	3672	tags=38%, list=28%, signal=52%
WHITFIELD_CELL_CYCLE_G2	117	0.283004	1.38325	0.0252366	0.152559	1	2996	tags=32%, list=22%, signal=42%
GOZGIT_ESR1_TARGETS_UP	110	0.288808	1.38288	0.0309859	0.152711	1	1515	tags=22%, list=11%, signal=24%
BILBAN_B_CLL_LPL_DN	35	0.365229	1.38242	0.0631579	0.152934	1	710	tags=23%, list=5%, signal=24%
REACTOME_DIABETES_PATHWAYS	113	0.286383	1.38186	0.0209581	0.153328	1	1990	tags=21%, list=15%, signal=25%
HERNANDEZ_ABERRANT_MITOSIS_BY_DOCETACEL_4NM_UP	19	0.424194	1.38132	0.0906863	0.153647	1	625	tags=21%, list=5%, signal=22%
MAHADEVAN_GIST_MORPHOLOGICAL_SWITCH	15	0.461601	1.3812	0.102041	0.153589	1	1646	tags=40%, list=12%, signal=46%
MONNIER_POSTRADIATION_TUMOR_ESCAPE_DN	231	0.255913	1.38106	0	0.153533	1	3028	tags=33%, list=23%, signal=42%
MIYAGAWA_TARGETS_OF_EWSR1_ETS_FUSIONS_UP	184	0.265935	1.38065	0.00775194	0.153683	1	1642	tags=22%, list=12%, signal=25%
KYNG_ENVIRONMENTAL_STRESS_RESPONSE_NOT_BY_GAMMA_IN_OLD	27	0.391711	1.38037	0.0745192	0.153771	1	1434	tags=30%, list=11%, signal=33%
LEE_NEURAL_CREST_STEM_CELL_DN	109	0.28377	1.38018	0.0283912	0.153762	1	1425	tags=19%, list=11%, signal=21%
NIELSEN_SCHWANNOMA_UP	16	0.438512	1.37927	0.08	0.154439	1	1186	tags=25%, list=9%, signal=27%
BROWNE_HCMV_INFECTION_12HR_DN	85	0.30147	1.37926	0.0368272	0.154264	1	3259	tags=39%, list=24%, signal=51%
FLECHNER_PBL_KIDNEY_TRANSPLANT_REJECTED_VS_OK_DN	47	0.34034	1.37835	0.0494792	0.154917	1	2782	tags=43%, list=21%, signal=54%
DARWICHE_SQUAMOUS_CELL_CARCINOMA_UP	104	0.288515	1.3783	0.0376176	0.154798	1	3148	tags=35%, list=24%, signal=45%
RADAEVA_RESPONSE_TO_IFNA1_UP	51	0.327204	1.3782	0.048	0.154706	1	3672	tags=47%, list=28%, signal=65%
MARTORIATI_MDM4_TARGETS_FETAL_LIVER_DN	408	0.238438	1.37785	0	0.15492	1	2382	tags=26%, list=18%, signal=30%
LANDIS_ERBB2_BREAST_TUMORS_324_DN	130	0.279088	1.37659	0.022508	0.155922	1	1983	tags=24%, list=15%, signal=28%
LIU_VAV3_PROSTATE_CARCINOGENESIS_UP	82	0.295502	1.37445	0.0233918	0.157728	1	2162	tags=27%, list=16%, signal=32%
TRACEY_RESISTANCE_TO_IFNA2_DN	27	0.382418	1.37393	0.112299	0.158074	1	2654	tags=41%, list=20%, signal=51%
WANG_CISPLATIN_RESPONSE_AND_XPC_DN	195	0.259906	1.37389	0.00348432	0.157933	1	2585	tags=29%, list=19%, signal=35%
BIDUS_METASTASIS_UP	157	0.26791	1.3733	0.0161812	0.158327	1	3085	tags=32%, list=23%, signal=42%
OLSSON_E2F3_TARGETS_UP	23	0.395189	1.3713	0.0623441	0.160028	1	1883	tags=30%, list=14%, signal=35%
REACTOME_ANTIGEN_PROCESSING_CROSS_PRESENTATION	68	0.304639	1.37115	0.038674	0.160007	1	2806	tags=31%, list=21%, signal=39%
SUBTIL_PROGESTIN_TARGETS	30	0.371392	1.37099	0.0817757	0.160018	1	72	tags=13%, list=1%, signal=13%
LIANG_SILENCED_BY_METHYLATION_UP	28	0.386552	1.36995	0.0792839	0.160801	1	1194	tags=21%, list=9%, signal=23%
CHEBOTAEV_GR_TARGETS_UP	59	0.317399	1.36983	0.048	0.16075	1	2169	tags=31%, list=16%, signal=36%
DURAND_STROMA_NS_UP	106	0.280809	1.3695	0.0366972	0.160919	1	3009	tags=33%, list=23%, signal=42%
NIKOLSKY_BREAST_CANCER_7Q21_Q22_AMPLICON	50	0.326337	1.36937	0.0566038	0.160868	1	1391	tags=24%, list=10%, signal=27%
PROVENZANI_METASTASIS_UP	168	0.265849	1.36932	0.0109489	0.160734	1	2937	tags=30%, list=22%, signal=38%
STOSSI_RESPONSE_TO_ESTRADIOL	49	0.330711	1.36917	0.0611702	0.160707	1	2115	tags=29%, list=16%, signal=34%
RIZ_ERYTHROID_DIFFERENTIATION_12HR	40	0.346314	1.36914	0.0644258	0.160551	1	482	tags=15%, list=4%, signal=16%
ZHANG_ANTIVIRAL_RESPONSE_TO_RIBAVIRIN_UP	29	0.378857	1.36864	0.0956072	0.160862	1	3446	tags=45%, list=26%, signal=60%
TONKS_TARGETS_OF_RUNX1_RUNX1T1_FUSION_SUSTAINED_IN_GRANULOCYTE_UP	15	0.447657	1.36826	0.0906863	0.161078	1	1713	tags=53%, list=13%, signal=61%
REACTOME_ANTIVIRAL_MECHANISM_BY_IFN_STIMULATED_GENES	60	0.318615	1.36795	0.0544959	0.161208	1	2605	tags=32%, list=20%, signal=39%
NOJIMA_SFRP2_TARGETS_UP	27	0.378273	1.36746	0.0894118	0.161522	1	2085	tags=26%, list=16%, signal=31%
HANSON_HRAS_SIGNALING_VIA_NFKB	18	0.425215	1.36745	0.0824053	0.161352	1	1783	tags=39%, list=13%, signal=45%
MARKEY_RB1_ACUTE_LOF_UP	184	0.261076	1.36728	0.0107143	0.161349	1	2563	tags=27%, list=19%, signal=33%
DAVICIONI_PAX_FOXO1_SIGNATURE_IN_ARMS_UP	53	0.322457	1.3661	0.0580475	0.162343	1	1965	tags=26%, list=15%, signal=31%
HAHTOLA_MYCOSIS_FUNGOIDES_SKIN_UP	149	0.264784	1.36514	0.0282686	0.163123	1	3510	tags=38%, list=26%, signal=51%
REACTOME_HEMOSTASIS	401	0.239723	1.364	0	0.164119	1	1980	tags=21%, list=15%, signal=24%
NAKAJIMA_MAST_CELL	42	0.337388	1.36283	0.0864865	0.165139	1	1265	tags=26%, list=9%, signal=29%
JISON_SICKLE_CELL_DISEASE_UP	168	0.26479	1.36254	0.0106007	0.165236	1	2366	tags=28%, list=18%, signal=34%
IVANOVA_HEMATOPOIESIS_STEM_CELL	173	0.264591	1.36253	0.0295203	0.165061	1	2568	tags=28%, list=19%, signal=35%
MARCHINI_TRABECTEDIN_RESISTANCE_DN	48	0.324605	1.36138	0.0661157	0.16607	1	2181	tags=27%, list=16%, signal=32%
RODWELL_AGING_KIDNEY_UP	337	0.241988	1.36019	0	0.167152	1	2689	tags=26%, list=20%, signal=31%
WIERENGA_PML_INTERACTOME	35	0.355405	1.36013	0.0678851	0.16702	1	1876	tags=29%, list=14%, signal=33%
MAYBURD_RESPONSE_TO_L663536_DN	44	0.342405	1.35955	0.0712401	0.167423	1	3960	tags=50%, list=30%, signal=71%
PEDERSEN_METASTASIS_BY_ERBB2_ISOFORM_4	77	0.299414	1.35937	0.0504451	0.167421	1	2499	tags=30%, list=19%, signal=37%
CHIANG_LIVER_CANCER_SUBCLASS_INTERFERON_UP	24	0.394844	1.35932	0.0693069	0.167285	1	2275	tags=42%, list=17%, signal=50%
ONKEN_UVEAL_MELANOMA_DN	462	0.232038	1.35894	0	0.167474	1	2602	tags=28%, list=20%, signal=34%
FOSTER_TOLERANT_MACROPHAGE_UP	114	0.277912	1.35825	0.0226537	0.168005	1	1941	tags=25%, list=15%, signal=29%
ROME_INSULIN_TARGETS_IN_MUSCLE_UP	324	0.240595	1.35801	0.00434783	0.168101	1	2549	tags=27%, list=19%, signal=32%
UEDA_PERIFERAL_CLOCK	123	0.276282	1.35791	0.023569	0.168017	1	2425	tags=28%, list=18%, signal=33%
BLALOCK_ALZHEIMERS_DISEASE_INCIPIENT_UP	350	0.238461	1.35791	0.00492611	0.167834	1	2100	tags=23%, list=16%, signal=27%
CHEN_PDGF_TARGETS	17	0.438415	1.3579	0.105398	0.167659	1	1770	tags=35%, list=13%, signal=41%
BOYAULT_LIVER_CANCER_SUBCLASS_G3_UP	156	0.265119	1.35742	0.017301	0.167966	1	3270	tags=35%, list=25%, signal=46%
FAELT_B_CLL_WITH_VH3_21_DN	47	0.334123	1.35712	0.059126	0.168085	1	3448	tags=45%, list=26%, signal=60%
BOYLAN_MULTIPLE_MYELOMA_C_DN	40	0.349251	1.35706	0.0841837	0.167956	1	3348	tags=43%, list=25%, signal=57%
MORI_PLASMA_CELL_UP	32	0.357661	1.35655	0.0675325	0.168271	1	3393	tags=47%, list=25%, signal=63%
BIOCARTA_NTHI_PATHWAY	23	0.404192	1.35545	0.0822281	0.169176	1	2038	tags=39%, list=15%, signal=46%
URS_ADIPOCYTE_DIFFERENTIATION_UP	62	0.309308	1.35524	0.077135	0.169216	1	1515	tags=26%, list=11%, signal=29%
VALK_AML_CLUSTER_15	28	0.366187	1.35522	0.0952381	0.169054	1	2776	tags=36%, list=21%, signal=45%
FARMER_BREAST_CANCER_APOCRINE_VS_LUMINAL	284	0.244359	1.35488	0.012931	0.169189	1	1604	tags=19%, list=12%, signal=21%
REACTOME_CHEMOKINE_RECEPTORS_BIND_CHEMOKINES	46	0.327822	1.3548	0.0637681	0.169075	1	4009	tags=54%, list=30%, signal=77%
YAO_TEMPORAL_RESPONSE_TO_PROGESTERONE_CLUSTER_8	41	0.337089	1.35438	0.0897098	0.169323	1	3515	tags=51%, list=26%, signal=69%
ACEVEDO_LIVER_CANCER_WITH_H3K27ME3_DN	115	0.281189	1.3541	0.0314465	0.169432	1	1309	tags=20%, list=10%, signal=22%
BILBAN_B_CLL_LPL_UP	61	0.313743	1.35333	0.0473538	0.170024	1	1387	tags=23%, list=10%, signal=26%
ZHAN_V1_LATE_DIFFERENTIATION_GENES_UP	32	0.363648	1.35297	0.0688775	0.170167	1	462	tags=16%, list=3%, signal=16%
FIGUEROA_AML_METHYLATION_CLUSTER_7_UP	81	0.298931	1.3517	0.0613497	0.171211	1	1418	tags=22%, list=11%, signal=25%
JEPSEN_SMRT_TARGETS	28	0.37625	1.35146	0.0894737	0.171235	1	2167	tags=36%, list=16%, signal=43%
REACTOME_ACTIVATION_OF_NF_KAPPAB_IN_B_CELLS	56	0.315164	1.35082	0.0625	0.171723	1	2806	tags=34%, list=21%, signal=43%
YE_METASTATIC_LIVER_CANCER	26	0.373691	1.35007	0.077957	0.172285	1	1510	tags=27%, list=11%, signal=30%
SASAI_RESISTANCE_TO_NEOPLASTIC_TRANSFROMATION	49	0.330757	1.34991	0.0616247	0.172283	1	2353	tags=31%, list=18%, signal=37%
LI_INDUCED_T_TO_NATURAL_KILLER_UP	219	0.253916	1.34982	0.0145455	0.17217	1	1935	tags=23%, list=15%, signal=26%
HOLLEMAN_VINCRISTINE_RESISTANCE_B_ALL_UP	32	0.366503	1.34941	0.0859951	0.172442	1	1843	tags=31%, list=14%, signal=36%
NAKAMURA_ADIPOGENESIS_LATE_UP	85	0.290502	1.34905	0.0526316	0.172595	1	2162	tags=27%, list=16%, signal=32%
SESTO_RESPONSE_TO_UV_C4	16	0.436789	1.34851	0.115385	0.172954	1	668	tags=25%, list=5%, signal=26%
BILANGES_SERUM_AND_RAPAMYCIN_SENSITIVE_GENES	57	0.312605	1.34732	0.0676056	0.174023	1	3467	tags=42%, list=26%, signal=57%
DING_LUNG_CANCER_EXPRESSION_BY_COPY_NUMBER	81	0.291624	1.34723	0.0322581	0.173949	1	3109	tags=38%, list=23%, signal=50%
UDAYAKUMAR_MED1_TARGETS_DN	214	0.249461	1.34671	0.0199203	0.174327	1	2404	tags=24%, list=18%, signal=29%
YAO_HOXA10_TARGETS_VIA_PROGESTERONE_UP	67	0.304219	1.34594	0.0586592	0.17494	1	2167	tags=30%, list=16%, signal=35%
TONKS_TARGETS_OF_RUNX1_RUNX1T1_FUSION_SUSTAINDED_IN_ERYTHROCYTE_UP	43	0.340458	1.34562	0.0758808	0.175093	1	1781	tags=30%, list=13%, signal=35%
STEARMAN_LUNG_CANCER_EARLY_VS_LATE_UP	97	0.283554	1.34458	0.0316092	0.175958	1	2534	tags=31%, list=19%, signal=38%
WAMUNYOKOLI_OVARIAN_CANCER_GRADES_1_2_UP	92	0.287491	1.3445	0.0421348	0.175861	1	3049	tags=34%, list=23%, signal=43%
ZHANG_TARGETS_OF_EWSR1_FLI1_FUSION	79	0.292869	1.3423	0.0328767	0.177938	1	1763	tags=22%, list=13%, signal=25%
THUM_MIR21_TARGETS_HEART_DISEASE_UP	16	0.431984	1.34212	0.101523	0.177947	1	767	tags=19%, list=6%, signal=20%
YAMASHITA_LIVER_CANCER_WITH_EPCAM_UP	46	0.330409	1.34124	0.0878553	0.178715	1	3460	tags=43%, list=26%, signal=59%
KIM_GERMINAL_CENTER_T_HELPER_UP	50	0.32017	1.33983	0.0545455	0.180019	1	2736	tags=40%, list=21%, signal=50%
DAVICIONI_RHABDOMYOSARCOMA_PAX_FOXO1_FUSION_UP	59	0.314449	1.33912	0.0817942	0.180612	1	1781	tags=24%, list=13%, signal=27%
CREIGHTON_ENDOCRINE_THERAPY_RESISTANCE_5	337	0.236001	1.33911	0	0.180435	1	2271	tags=23%, list=17%, signal=27%
HAN_JNK_SINGALING_UP	28	0.369898	1.33873	0.0765306	0.180682	1	2183	tags=32%, list=16%, signal=38%
CONCANNON_APOPTOSIS_BY_EPOXOMICIN_UP	209	0.248347	1.33831	0.0188679	0.180926	1	2313	tags=26%, list=17%, signal=31%
GRADE_COLON_AND_RECTAL_CANCER_UP	213	0.250854	1.33825	0.0109489	0.180828	1	3081	tags=31%, list=23%, signal=40%
LEE_LIVER_CANCER_CIPROFIBRATE_UP	56	0.317481	1.33789	0.0790191	0.181014	1	1695	tags=21%, list=13%, signal=24%
RICKMAN_METASTASIS_UP	211	0.253573	1.33746	0.0181818	0.181302	1	2365	tags=27%, list=18%, signal=32%
BENPORATH_OCT4_TARGETS	223	0.250494	1.33694	0.00421941	0.181697	1	2405	tags=25%, list=18%, signal=30%
PID_CONE_PATHWAY	19	0.415087	1.33673	0.129496	0.181691	1	1085	tags=21%, list=8%, signal=23%
YOSHIMURA_MAPK8_TARGETS_DN	312	0.237383	1.33657	0.00408163	0.181678	1	1890	tags=21%, list=14%, signal=24%
DANG_REGULATED_BY_MYC_DN	231	0.248122	1.33653	0.00833333	0.181535	1	1668	tags=19%, list=13%, signal=22%
GARGALOVIC_RESPONSE_TO_OXIDIZED_PHOSPHOLIPIDS_GREY_DN	41	0.33953	1.33597	0.0918635	0.181832	1	2578	tags=32%, list=19%, signal=39%
PID_SYNDECAN_4_PATHWAY	31	0.367335	1.3359	0.101036	0.18173	1	1239	tags=26%, list=9%, signal=28%
PID_AVB3_INTEGRIN_PATHWAY	70	0.295694	1.33571	0.0632184	0.181767	1	1656	tags=26%, list=12%, signal=29%
BIOCARTA_CALCINEURIN_PATHWAY	16	0.431929	1.33541	0.133333	0.181916	1	4077	tags=63%, list=31%, signal=90%
YAO_TEMPORAL_RESPONSE_TO_PROGESTERONE_CLUSTER_16	67	0.304614	1.33189	0.0469613	0.185652	1	2563	tags=30%, list=19%, signal=37%
KEGG_SMALL_CELL_LUNG_CANCER	82	0.293856	1.33128	0.0682493	0.186117	1	1136	tags=20%, list=9%, signal=21%
KRASNOSELSKAYA_ILF3_TARGETS_DN	44	0.330888	1.33121	0.0833333	0.186021	1	1255	tags=18%, list=9%, signal=20%
CAIRO_PML_TARGETS_BOUND_BY_MYC_UP	21	0.397431	1.33109	0.102244	0.185953	1	3985	tags=43%, list=30%, signal=61%
HARRIS_HYPOXIA	77	0.293886	1.33088	0.058104	0.185992	1	1883	tags=22%, list=14%, signal=26%
GRAHAM_NORMAL_QUIESCENT_VS_NORMAL_DIVIDING_DN	78	0.294708	1.33037	0.0576369	0.186367	1	3369	tags=38%, list=25%, signal=51%
HOOI_ST7_TARGETS_UP	59	0.313269	1.33033	0.0608696	0.186214	1	2656	tags=36%, list=20%, signal=44%
RAY_TUMORIGENESIS_BY_ERBB2_CDC25A_UP	81	0.291126	1.33022	0.0519126	0.186142	1	2358	tags=26%, list=18%, signal=31%
RORIE_TARGETS_OF_EWSR1_FLI1_FUSION_UP	29	0.362945	1.33011	0.100529	0.186069	1	2424	tags=41%, list=18%, signal=50%
IZADPANAH_STEM_CELL_ADIPOSE_VS_BONE_DN	85	0.290808	1.32923	0.0389222	0.186827	1	2484	tags=32%, list=19%, signal=39%
REACTOME_CYTOKINE_SIGNALING_IN_IMMUNE_SYSTEM	238	0.247955	1.3286	0.011583	0.187322	1	3454	tags=37%, list=26%, signal=50%
ROSS_AML_WITH_AML1_ETO_FUSION	67	0.29711	1.32857	0.0598291	0.187163	1	2829	tags=39%, list=21%, signal=49%
WAKASUGI_HAVE_ZNF143_BINDING_SITES	49	0.325845	1.32812	0.0722222	0.187499	1	1832	tags=22%, list=14%, signal=26%
SCHRAETS_MLL_TARGETS_DN	29	0.358243	1.32794	0.0866142	0.187455	1	2987	tags=38%, list=22%, signal=49%
DARWICHE_SKIN_TUMOR_PROMOTER_UP	97	0.278733	1.32752	0.039039	0.187731	1	3266	tags=38%, list=25%, signal=50%
LY_AGING_OLD_DN	53	0.317305	1.32726	0.0647668	0.187814	1	954	tags=17%, list=7%, signal=18%
SANA_RESPONSE_TO_IFNG_DN	73	0.296612	1.32716	0.0609756	0.18776	1	2116	tags=26%, list=16%, signal=31%
FARMER_BREAST_CANCER_CLUSTER_1	37	0.3436	1.32591	0.0716332	0.188938	1	3146	tags=46%, list=24%, signal=60%
JAATINEN_HEMATOPOIETIC_STEM_CELL_UP	208	0.249278	1.32547	0.0143885	0.18924	1	2195	tags=26%, list=16%, signal=31%
IGARASHI_ATF4_TARGETS_DN	73	0.296439	1.32545	0.0606061	0.189064	1	2644	tags=34%, list=20%, signal=42%
TSENG_ADIPOGENIC_POTENTIAL_DN	40	0.343876	1.32519	0.0938272	0.189168	1	2193	tags=33%, list=16%, signal=39%
PID_ANGIOPOIETIN_RECEPTOR_PATHWAY	49	0.321551	1.32454	0.0795455	0.189768	1	2172	tags=35%, list=16%, signal=41%
YIH_RESPONSE_TO_ARSENITE_C1	24	0.390914	1.32315	0.135831	0.19119	1	1388	tags=25%, list=10%, signal=28%
DALESSIO_TSA_RESPONSE	25	0.381574	1.32179	0.108586	0.192501	1	3700	tags=48%, list=28%, signal=66%
TSAI_RESPONSE_TO_IONIZING_RADIATION	136	0.265903	1.32176	0.0189873	0.192345	1	1913	tags=21%, list=14%, signal=25%
YAO_TEMPORAL_RESPONSE_TO_PROGESTERONE_CLUSTER_6	56	0.314362	1.32077	0.0560224	0.193188	1	1799	tags=25%, list=14%, signal=29%
MACLACHLAN_BRCA1_TARGETS_DN	15	0.43854	1.32033	0.16792	0.19349	1	1915	tags=33%, list=14%, signal=39%
ELVIDGE_HIF1A_TARGETS_DN	78	0.295362	1.32031	0.0501393	0.193313	1	2580	tags=32%, list=19%, signal=40%
SU_TESTIS	71	0.296343	1.32019	0.0625	0.193239	1	2652	tags=35%, list=20%, signal=44%
HONRADO_BREAST_CANCER_BRCA1_VS_BRCA2	18	0.423355	1.32018	0.117096	0.193057	1	4367	tags=50%, list=33%, signal=74%
GRAHAM_CML_DIVIDING_VS_NORMAL_QUIESCENT_UP	164	0.255136	1.31745	0.0308219	0.195761	1	3357	tags=35%, list=25%, signal=47%
CREIGHTON_ENDOCRINE_THERAPY_RESISTANCE_3	482	0.225101	1.31639	0	0.196799	1	2154	tags=23%, list=16%, signal=27%
KYNG_DNA_DAMAGE_BY_GAMMA_AND_UV_RADIATION	77	0.296691	1.31632	0.0771429	0.19668	1	2174	tags=25%, list=16%, signal=29%
WILENSKY_RESPONSE_TO_DARAPLADIB	27	0.365089	1.31471	0.121212	0.198384	1	1199	tags=22%, list=9%, signal=24%
VERRECCHIA_DELAYED_RESPONSE_TO_TGFB1	39	0.333373	1.31453	0.0813008	0.198402	1	1107	tags=26%, list=8%, signal=28%
ZHAN_MULTIPLE_MYELOMA_MF_DN	23	0.381454	1.31425	0.122249	0.198567	1	1239	tags=26%, list=9%, signal=29%
KEGG_HEMATOPOIETIC_CELL_LINEAGE	83	0.283912	1.31248	0.0797721	0.200378	1	1182	tags=16%, list=9%, signal=17%
MILI_PSEUDOPODIA_HAPTOTAXIS_DN	464	0.224509	1.3117	0	0.201057	1	3029	tags=29%, list=23%, signal=37%
PID_PDGFRA_PATHWAY	21	0.394984	1.31149	0.119481	0.201096	1	1915	tags=29%, list=14%, signal=33%
STEIN_ESRRA_TARGETS_DN	88	0.281969	1.31137	0.0584958	0.20103	1	1746	tags=23%, list=13%, signal=26%
LINDSTEDT_DENDRITIC_CELL_MATURATION_D	66	0.302173	1.31128	0.0793651	0.200955	1	2987	tags=35%, list=22%, signal=45%
KEGG_GRAFT_VERSUS_HOST_DISEASE	37	0.334622	1.31116	0.0934343	0.200907	1	3442	tags=41%, list=26%, signal=55%
LIN_NPAS4_TARGETS_DN	49	0.320618	1.31105	0.10929	0.200841	1	2568	tags=39%, list=19%, signal=48%
SMID_BREAST_CANCER_RELAPSE_IN_LUNG_DN	36	0.341638	1.31027	0.118388	0.201587	1	2507	tags=33%, list=19%, signal=41%
TIEN_INTESTINE_PROBIOTICS_6HR_DN	140	0.262312	1.30974	0.0272109	0.202004	1	3535	tags=44%, list=27%, signal=59%
RASHI_RESPONSE_TO_IONIZING_RADIATION_5	114	0.271357	1.3088	0.0364742	0.20295	1	1972	tags=24%, list=15%, signal=28%
HEIDENBLAD_AMPLICON_12P11_12_UP	29	0.366989	1.30825	0.106173	0.203388	1	1605	tags=34%, list=12%, signal=39%
WUNDER_INFLAMMATORY_RESPONSE_AND_CHOLESTEROL_UP	45	0.325579	1.30773	0.0946291	0.20385	1	3319	tags=40%, list=25%, signal=53%
KYNG_ENVIRONMENTAL_STRESS_RESPONSE_NOT_BY_GAMMA_IN_WS	27	0.36769	1.30723	0.131841	0.20423	1	1328	tags=33%, list=10%, signal=37%
SHAFFER_IRF4_TARGETS_IN_ACTIVATED_DENDRITIC_CELL	61	0.296573	1.30608	0.0672269	0.205357	1	3013	tags=34%, list=23%, signal=44%
TONKS_TARGETS_OF_RUNX1_RUNX1T1_FUSION_HSC_DN	170	0.253231	1.30591	0.025	0.205345	1	3237	tags=31%, list=24%, signal=41%
OKAMOTO_LIVER_CANCER_MULTICENTRIC_OCCURRENCE_UP	23	0.379912	1.30476	0.12532	0.206555	1	2096	tags=30%, list=16%, signal=36%
SWEET_KRAS_TARGETS_DN	60	0.306343	1.30463	0.0744986	0.206507	1	3124	tags=32%, list=23%, signal=41%
BIOCARTA_PROTEASOME_PATHWAY	26	0.369527	1.30435	0.0969267	0.206593	1	1728	tags=27%, list=13%, signal=31%
REACTOME_SIGNALING_BY_CONSTITUTIVELY_ACTIVE_EGFR	17	0.416101	1.30394	0.138539	0.206906	1	1915	tags=29%, list=14%, signal=34%
REACTOME_IL1_SIGNALING	30	0.359051	1.30369	0.131841	0.207003	1	2237	tags=37%, list=17%, signal=44%
WANG_IMMORTALIZED_BY_HOXA9_AND_MEIS1_DN	20	0.402718	1.30366	0.127711	0.206843	1	3258	tags=35%, list=24%, signal=46%
REACTOME_FORMATION_OF_INCISION_COMPLEX_IN_GG_NER	19	0.405362	1.30335	0.12156	0.206979	1	854	tags=21%, list=6%, signal=22%
ZHAN_LATE_DIFFERENTIATION_GENES_UP	32	0.356648	1.30254	0.135338	0.207709	1	2543	tags=34%, list=19%, signal=42%
CHANG_CORE_SERUM_RESPONSE_DN	153	0.255273	1.30193	0.0301003	0.208122	1	1509	tags=18%, list=11%, signal=20%
BASSO_CD40_SIGNALING_UP	91	0.2772	1.3018	0.0648968	0.208068	1	2925	tags=32%, list=22%, signal=41%
RAO_BOUND_BY_SALL4_ISOFORM_B	360	0.232625	1.30172	0.00438597	0.207941	1	2433	tags=24%, list=18%, signal=29%
LEE_LIVER_CANCER_MYC_E2F1_UP	54	0.306535	1.30132	0.0815789	0.208182	1	2436	tags=39%, list=18%, signal=47%
ACEVEDO_LIVER_CANCER_WITH_H3K9ME3_DN	67	0.300672	1.3	0.0929578	0.209584	1	2669	tags=27%, list=20%, signal=33%
VANHARANTA_UTERINE_FIBROID_WITH_7Q_DELETION_UP	57	0.305111	1.3	0.0789474	0.209381	1	2119	tags=30%, list=16%, signal=35%
SWEET_LUNG_CANCER_KRAS_UP	407	0.225485	1.29946	0	0.209841	1	2119	tags=23%, list=16%, signal=26%
TAKEDA_TARGETS_OF_NUP98_HOXA9_FUSION_6HR_DN	31	0.348786	1.29914	0.128205	0.210023	1	1615	tags=29%, list=12%, signal=33%
HOSHIDA_LIVER_CANCER_SURVIVAL_UP	68	0.289766	1.29886	0.0767045	0.210186	1	771	tags=16%, list=6%, signal=17%
RIGGINS_TAMOXIFEN_RESISTANCE_UP	62	0.295443	1.29831	0.0745856	0.210579	1	1113	tags=16%, list=8%, signal=18%
HEIDENBLAD_AMPLICON_8Q24_DN	30	0.357156	1.29821	0.113253	0.210515	1	1956	tags=27%, list=15%, signal=31%
BASSO_B_LYMPHOCYTE_NETWORK	119	0.26217	1.29807	0.0495049	0.210483	1	2887	tags=34%, list=22%, signal=44%
HUANG_FOXA2_TARGETS_DN	36	0.342519	1.2977	0.124668	0.210789	1	1536	tags=28%, list=12%, signal=31%
BOQUEST_STEM_CELL_DN	189	0.24582	1.29694	0.0396825	0.211443	1	2829	tags=30%, list=21%, signal=37%
PID_AJDISS_2PATHWAY	46	0.315433	1.29542	0.0870712	0.213263	1	710	tags=15%, list=5%, signal=16%
TURASHVILI_BREAST_LOBULAR_CARCINOMA_VS_DUCTAL_NORMAL_DN	68	0.296018	1.29476	0.0730159	0.213788	1	2376	tags=29%, list=18%, signal=36%
FIGUEROA_AML_METHYLATION_CLUSTER_1_UP	73	0.286108	1.29433	0.0849315	0.214134	1	1975	tags=27%, list=15%, signal=32%
AMIT_SERUM_RESPONSE_480_MCF10A	34	0.338971	1.29285	0.136483	0.215867	1	1186	tags=24%, list=9%, signal=26%
DITTMER_PTHLH_TARGETS_UP	101	0.274421	1.29254	0.0630915	0.216063	1	1983	tags=26%, list=15%, signal=30%
WU_HBX_TARGETS_1_UP	16	0.406844	1.29222	0.162963	0.216281	1	1849	tags=44%, list=14%, signal=51%
KANG_IMMORTALIZED_BY_TERT_UP	85	0.277287	1.29135	0.0746269	0.217243	1	3218	tags=36%, list=24%, signal=48%
KYNG_ENVIRONMENTAL_STRESS_RESPONSE_NOT_BY_UV_IN_OLD	18	0.409399	1.29115	0.140187	0.217269	1	1434	tags=33%, list=11%, signal=37%
HOLLMANN_APOPTOSIS_VIA_CD40_DN	236	0.239144	1.29095	0.0337553	0.217298	1	2906	tags=29%, list=22%, signal=37%
GEORGANTAS_HSC_MARKERS	63	0.297748	1.29077	0.0898551	0.217286	1	1794	tags=22%, list=13%, signal=26%
GINESTIER_BREAST_CANCER_ZNF217_AMPLIFIED_UP	51	0.314267	1.29067	0.101877	0.21719	1	3830	tags=49%, list=29%, signal=69%
PLASARI_TGFB1_SIGNALING_VIA_NFIC_1HR_DN	83	0.281865	1.29034	0.058651	0.2174	1	1795	tags=24%, list=13%, signal=28%
SAGIV_CD24_TARGETS_DN	46	0.318525	1.29017	0.101408	0.217351	1	621	tags=17%, list=5%, signal=18%
NGO_MALIGNANT_GLIOMA_1P_LOH	15	0.427863	1.28946	0.156909	0.218024	1	2116	tags=40%, list=16%, signal=48%
YAUCH_HEDGEHOG_SIGNALING_PARACRINE_UP	98	0.268865	1.28767	0.0623053	0.220091	1	2905	tags=30%, list=22%, signal=38%
ZHANG_RESPONSE_TO_IKK_INHIBITOR_AND_TNF_DN	68	0.292265	1.28703	0.097035	0.220702	1	1649	tags=25%, list=12%, signal=28%
GREENBAUM_E2A_TARGETS_UP	31	0.345761	1.28696	0.12973	0.220604	1	3974	tags=52%, list=30%, signal=73%
SMITH_TERT_TARGETS_UP	133	0.259554	1.28608	0.0555556	0.221466	1	3213	tags=35%, list=24%, signal=45%
OXFORD_RALA_OR_RALB_TARGETS_DN	21	0.398357	1.28601	0.132316	0.221336	1	1945	tags=24%, list=15%, signal=28%
RAO_BOUND_BY_SALL4	142	0.254936	1.28592	0.0519481	0.221264	1	3489	tags=39%, list=26%, signal=53%
PETROVA_ENDOTHELIUM_LYMPHATIC_VS_BLOOD_UP	121	0.262339	1.2859	0.0507463	0.22109	1	2436	tags=26%, list=18%, signal=32%
AFFAR_YY1_TARGETS_UP	180	0.247919	1.28545	0.0381679	0.221459	1	1795	tags=21%, list=13%, signal=23%
SAKAI_TUMOR_INFILTRATING_MONOCYTES_DN	73	0.282641	1.28497	0.0802469	0.221869	1	1984	tags=26%, list=15%, signal=30%
PURBEY_TARGETS_OF_CTBP1_AND_SATB1_UP	66	0.294265	1.28342	0.0842697	0.223549	1	1587	tags=23%, list=12%, signal=26%
VANTVEER_BREAST_CANCER_POOR_PROGNOSIS	38	0.333834	1.28269	0.10101	0.224195	1	2678	tags=29%, list=20%, signal=36%
SPIRA_SMOKERS_LUNG_CANCER_UP	35	0.33372	1.28224	0.125683	0.224532	1	3123	tags=40%, list=23%, signal=52%
PID_ARF6_TRAFFICKING_PATHWAY	43	0.324462	1.28177	0.115789	0.224875	1	2172	tags=23%, list=16%, signal=28%
COWLING_MYCN_TARGETS	29	0.354028	1.28142	0.135678	0.225117	1	2233	tags=31%, list=17%, signal=37%
IVANOVSKA_MIR106B_TARGETS	65	0.28758	1.28075	0.0574713	0.225725	1	2041	tags=26%, list=15%, signal=31%
ROSS_AML_WITH_CBFB_MYH11_FUSION	48	0.308558	1.28057	0.0967742	0.225762	1	2776	tags=29%, list=21%, signal=37%
LY_AGING_PREMATURE_DN	29	0.353376	1.28041	0.129584	0.225767	1	832	tags=21%, list=6%, signal=22%
DURCHDEWALD_SKIN_CARCINOGENESIS_UP	61	0.293867	1.27971	0.101493	0.226506	1	2295	tags=28%, list=17%, signal=34%
PID_VEGFR1_2_PATHWAY	65	0.285719	1.27892	0.0749354	0.227312	1	1430	tags=23%, list=11%, signal=26%
GAUSSMANN_MLL_AF4_FUSION_TARGETS_A_DN	60	0.292954	1.27871	0.0896359	0.227376	1	1305	tags=22%, list=10%, signal=24%
STEIN_ESTROGEN_RESPONSE_NOT_VIA_ESRRA	17	0.416329	1.27839	0.13198	0.227542	1	606	tags=24%, list=5%, signal=25%
TURASHVILI_BREAST_LOBULAR_CARCINOMA_VS_LOBULAR_NORMAL_UP	72	0.287977	1.27656	0.0784884	0.229752	1	2426	tags=24%, list=18%, signal=29%
KEGG_ENDOCYTOSIS	145	0.252338	1.27647	0.0513699	0.229658	1	1917	tags=23%, list=14%, signal=26%
NABA_BASEMENT_MEMBRANES	30	0.347629	1.27631	0.143885	0.22964	1	2162	tags=33%, list=16%, signal=40%
STAMBOLSKY_TARGETS_OF_MUTATED_TP53_DN	35	0.338214	1.27537	0.129676	0.230664	1	2950	tags=40%, list=22%, signal=51%
BHATTACHARYA_EMBRYONIC_STEM_CELL	68	0.290345	1.27526	0.0704225	0.230602	1	3460	tags=38%, list=26%, signal=51%
REACTOME_SIGNALING_BY_BMP	20	0.387962	1.2747	0.150121	0.231117	1	2521	tags=35%, list=19%, signal=43%
WHITFIELD_CELL_CYCLE_S	104	0.267598	1.27394	0.0733138	0.231856	1	3302	tags=35%, list=25%, signal=46%
KIM_RESPONSE_TO_TSA_AND_DECITABINE_UP	118	0.261465	1.27362	0.0731707	0.232064	1	2253	tags=24%, list=17%, signal=28%
HOSHIDA_LIVER_CANCER_LATE_RECURRENCE_UP	53	0.301923	1.27304	0.0947368	0.232676	1	1646	tags=26%, list=12%, signal=30%
CARD_MIR302A_TARGETS	62	0.293942	1.27252	0.0840336	0.233179	1	2093	tags=26%, list=16%, signal=30%
PUJANA_BRCA_CENTERED_NETWORK	106	0.265588	1.27198	0.0589971	0.233685	1	3369	tags=34%, list=25%, signal=45%
KEGG_APOPTOSIS	78	0.279883	1.27163	0.0724234	0.233938	1	2046	tags=26%, list=15%, signal=30%
ADDYA_ERYTHROID_DIFFERENTIATION_BY_HEMIN	69	0.284022	1.27159	0.0874636	0.233766	1	764	tags=13%, list=6%, signal=14%
BLALOCK_ALZHEIMERS_DISEASE_INCIPIENT_DN	157	0.249295	1.27137	0.0428571	0.233853	1	1922	tags=22%, list=14%, signal=25%
YORDY_RECIPROCAL_REGULATION_BY_ETS1_AND_SP100_DN	65	0.292951	1.27119	0.120219	0.233857	1	2160	tags=25%, list=16%, signal=29%
ST_TUMOR_NECROSIS_FACTOR_PATHWAY	27	0.350339	1.27114	0.150754	0.23371	1	1972	tags=30%, list=15%, signal=35%
LEI_HOXC8_TARGETS_DN	16	0.402419	1.27069	0.159145	0.234119	1	4256	tags=56%, list=32%, signal=83%
LEE_EARLY_T_LYMPHOCYTE_DN	40	0.326957	1.26985	0.109375	0.235018	1	2872	tags=38%, list=22%, signal=48%
GENTILE_UV_RESPONSE_CLUSTER_D8	33	0.335202	1.26964	0.120513	0.235051	1	710	tags=18%, list=5%, signal=19%
COATES_MACROPHAGE_M1_VS_M2_UP	52	0.30829	1.26881	0.125348	0.235947	1	2279	tags=31%, list=17%, signal=37%
BROWNE_HCMV_INFECTION_8HR_DN	40	0.317769	1.26767	0.127451	0.237248	1	1083	tags=20%, list=8%, signal=22%
GAVIN_PDE3B_TARGETS	20	0.378802	1.26744	0.140921	0.237363	1	1634	tags=15%, list=12%, signal=17%
CHIARADONNA_NEOPLASTIC_TRANSFORMATION_CDC25_DN	131	0.254691	1.26668	0.0611621	0.238092	1	3687	tags=41%, list=28%, signal=56%
WEINMANN_ADAPTATION_TO_HYPOXIA_UP	27	0.353123	1.2653	0.131016	0.239812	1	2181	tags=37%, list=16%, signal=44%
GAUSSMANN_MLL_AF4_FUSION_TARGETS_D_UP	27	0.358104	1.26514	0.127182	0.239797	1	1248	tags=26%, list=9%, signal=29%
ZHONG_RESPONSE_TO_AZACITIDINE_AND_TSA_UP	166	0.246213	1.26456	0.0352113	0.240372	1	2350	tags=26%, list=18%, signal=31%
MAGRANGEAS_MULTIPLE_MYELOMA_IGLL_VS_IGLK_UP	37	0.330909	1.26405	0.131429	0.240795	1	2072	tags=27%, list=16%, signal=32%
EPPERT_LSC_R	33	0.329598	1.26382	0.140957	0.240875	1	2564	tags=33%, list=19%, signal=41%
AMIT_DELAYED_EARLY_GENES	16	0.404667	1.26324	0.174118	0.241428	1	2762	tags=38%, list=21%, signal=47%
FINETTI_BREAST_CANCERS_KINOME_BLUE	15	0.414776	1.26311	0.187935	0.241395	1	469	tags=20%, list=4%, signal=21%
AMIT_EGF_RESPONSE_240_MCF10A	18	0.400103	1.26175	0.187661	0.243058	1	1424	tags=22%, list=11%, signal=25%
SHAFFER_IRF4_TARGETS_IN_MYELOMA_VS_MATURE_B_LYMPHOCYTE	95	0.267256	1.26123	0.0945122	0.24351	1	2126	tags=23%, list=16%, signal=27%
CROONQUIST_NRAS_VS_STROMAL_STIMULATION_UP	36	0.328216	1.26012	0.13948	0.24488	1	1720	tags=28%, list=13%, signal=32%
GUTIERREZ_CHRONIC_LYMPHOCYTIC_LEUKEMIA_DN	50	0.303299	1.26001	0.102564	0.244814	1	1695	tags=22%, list=13%, signal=25%
CHEBOTAEV_GR_TARGETS_DN	80	0.2709	1.25916	0.111748	0.245776	1	2723	tags=30%, list=20%, signal=37%
WEST_ADRENOCORTICAL_TUMOR_UP	261	0.229306	1.25885	0.025	0.246015	1	3360	tags=31%, list=25%, signal=40%
ROESSLER_LIVER_CANCER_METASTASIS_UP	99	0.264565	1.2587	0.0903427	0.246042	1	2196	tags=27%, list=16%, signal=32%
LEE_EARLY_T_LYMPHOCYTE_UP	81	0.271504	1.25844	0.0857143	0.24618	1	4020	tags=42%, list=30%, signal=60%
KENNY_CTNNB1_TARGETS_DN	41	0.323203	1.25816	0.145408	0.246338	1	1786	tags=29%, list=13%, signal=34%
YAGI_AML_WITH_INV_16_TRANSLOCATION	376	0.221543	1.25725	0.0144231	0.247379	1	2479	tags=23%, list=19%, signal=28%
APRELIKOVA_BRCA1_TARGETS	47	0.314228	1.25725	0.123393	0.24716	1	3769	tags=45%, list=28%, signal=62%
BIOCARTA_CDC42RAC_PATHWAY	15	0.431017	1.25612	0.170264	0.248503	1	3687	tags=47%, list=28%, signal=64%
DORSAM_HOXA9_TARGETS_UP	29	0.349094	1.25528	0.151134	0.24948	1	640	tags=17%, list=5%, signal=18%
ROSS_AML_OF_FAB_M7_TYPE	65	0.28688	1.25469	0.120235	0.250147	1	2305	tags=29%, list=17%, signal=35%
CHOW_RASSF1_TARGETS_UP	24	0.361521	1.25451	0.130326	0.250171	1	4044	tags=54%, list=30%, signal=78%
QI_PLASMACYTOMA_DN	84	0.272165	1.25272	0.0985916	0.252449	1	1989	tags=23%, list=15%, signal=26%
NABA_ECM_GLYCOPROTEINS	133	0.25372	1.2523	0.0769231	0.252822	1	2535	tags=27%, list=19%, signal=33%
REACTOME_INTERFERON_ALPHA_BETA_SIGNALING	59	0.286516	1.25217	0.117166	0.252792	1	3446	tags=39%, list=26%, signal=52%
BREDEMEYER_RAG_SIGNALING_VIA_ATM_NOT_VIA_NFKB_DN	28	0.344579	1.25201	0.145553	0.252794	1	1955	tags=29%, list=15%, signal=33%
TAKAO_RESPONSE_TO_UVB_RADIATION_DN	88	0.267791	1.25141	0.108333	0.253373	1	3035	tags=36%, list=23%, signal=47%
BROWNE_HCMV_INFECTION_1HR_UP	58	0.291214	1.25115	0.0994318	0.253486	1	1538	tags=19%, list=12%, signal=21%
BERENJENO_TRANSFORMED_BY_RHOA_DN	320	0.224022	1.25055	0.0174673	0.254104	1	2257	tags=25%, list=17%, signal=29%
MOHANKUMAR_TLX1_TARGETS_DN	136	0.251285	1.25009	0.0802676	0.254544	1	1769	tags=21%, list=13%, signal=24%
PID_P75_NTR_PATHWAY	62	0.285054	1.24968	0.110482	0.254917	1	1562	tags=23%, list=12%, signal=25%
NAKAYAMA_SOFT_TISSUE_TUMORS_PCA2_DN	74	0.277832	1.24897	0.118902	0.255798	1	2376	tags=31%, list=18%, signal=38%
DUTERTRE_ESTRADIOL_RESPONSE_6HR_UP	174	0.241024	1.24884	0.0498221	0.255722	1	1899	tags=20%, list=14%, signal=23%
NABA_CORE_MATRISOME	191	0.235705	1.24749	0.0565371	0.257373	1	2563	tags=26%, list=19%, signal=32%
FAELT_B_CLL_WITH_VH_REARRANGEMENTS_UP	40	0.321254	1.24707	0.167539	0.257722	1	3045	tags=40%, list=23%, signal=52%
REACTOME_SMOOTH_MUSCLE_CONTRACTION	21	0.371324	1.2458	0.170103	0.259409	1	1557	tags=29%, list=12%, signal=32%
GAZDA_DIAMOND_BLACKFAN_ANEMIA_MYELOID_UP	27	0.349065	1.24346	0.166265	0.262489	1	2054	tags=30%, list=15%, signal=35%
BIOCARTA_MTOR_PATHWAY	21	0.372488	1.24237	0.2075	0.263823	1	1388	tags=24%, list=10%, signal=27%
KOYAMA_SEMA3B_TARGETS_DN	272	0.227395	1.24208	0.0532787	0.263957	1	1818	tags=21%, list=14%, signal=23%
STAMBOLSKY_TARGETS_OF_MUTATED_TP53_UP	35	0.327367	1.24188	0.148883	0.263992	1	2621	tags=40%, list=20%, signal=50%
EGUCHI_CELL_CYCLE_RB1_TARGETS	22	0.36557	1.24155	0.174033	0.264254	1	4353	tags=50%, list=33%, signal=74%
HOFMANN_MYELODYSPLASTIC_SYNDROM_RISK_UP	22	0.365978	1.24138	0.158537	0.264278	1	744	tags=18%, list=6%, signal=19%
CLASPER_LYMPHATIC_VESSELS_DURING_METASTASIS_UP	17	0.393716	1.24116	0.17619	0.264399	1	1479	tags=29%, list=11%, signal=33%
KUMAR_PATHOGEN_LOAD_BY_MACROPHAGES	141	0.245362	1.24081	0.0811688	0.26468	1	905	tags=13%, list=7%, signal=14%
ABE_VEGFA_TARGETS_30MIN	28	0.344698	1.24035	0.161836	0.265175	1	893	tags=21%, list=7%, signal=23%
FLECHNER_PBL_KIDNEY_TRANSPLANT_REJECTED_VS_OK_UP	57	0.289223	1.23964	0.123596	0.265937	1	2806	tags=33%, list=21%, signal=42%
ZHANG_TLX_TARGETS_60HR_DN	202	0.233828	1.23902	0.0387597	0.266682	1	3701	tags=36%, list=28%, signal=49%
MCBRYAN_PUBERTAL_BREAST_3_4WK_UP	171	0.235463	1.23845	0.0544218	0.267226	1	2703	tags=29%, list=20%, signal=35%
MARZEC_IL2_SIGNALING_DN	27	0.354951	1.23815	0.187654	0.267461	1	1601	tags=26%, list=12%, signal=29%
WHITFIELD_CELL_CYCLE_G2_M	162	0.241515	1.23647	0.062963	0.269683	1	2619	tags=28%, list=20%, signal=34%
MAYBURD_RESPONSE_TO_L663536_UP	20	0.381845	1.23635	0.193798	0.26964	1	2348	tags=40%, list=18%, signal=48%
REACTOME_MEMBRANE_TRAFFICKING	100	0.259724	1.23618	0.100629	0.269668	1	1385	tags=21%, list=10%, signal=23%
CHANDRAN_METASTASIS_DN	194	0.234794	1.23541	0.0574713	0.270579	1	2791	tags=28%, list=21%, signal=35%
ABE_INNER_EAR	41	0.310978	1.23502	0.145889	0.270913	1	3439	tags=37%, list=26%, signal=49%
TARTE_PLASMA_CELL_VS_B_LYMPHOCYTE_DN	36	0.327103	1.23453	0.153639	0.271425	1	1365	tags=22%, list=10%, signal=25%
SESTO_RESPONSE_TO_UV_C1	60	0.290876	1.23444	0.131343	0.271308	1	1235	tags=18%, list=9%, signal=20%
KENNY_CTNNB1_TARGETS_UP	45	0.306534	1.23439	0.126289	0.271155	1	4284	tags=53%, list=32%, signal=78%
FORTSCHEGGER_PHF8_TARGETS_UP	173	0.234828	1.23429	0.0477941	0.271084	1	3537	tags=35%, list=27%, signal=47%
MARZEC_IL2_SIGNALING_UP	102	0.258526	1.23428	0.0879765	0.270854	1	1501	tags=17%, list=11%, signal=19%
WANG_MLL_TARGETS	209	0.228643	1.2335	0.0418251	0.27177	1	2729	tags=30%, list=20%, signal=37%
HU_GENOTOXIC_DAMAGE_24HR	31	0.33774	1.23278	0.180751	0.272544	1	2348	tags=29%, list=18%, signal=35%
PID_EPHA2_FWD_PATHWAY	17	0.389738	1.23242	0.199513	0.272832	1	3687	tags=53%, list=28%, signal=73%
DAZARD_RESPONSE_TO_UV_NHEK_UP	216	0.228681	1.23131	0.0418251	0.274291	1	2173	tags=23%, list=16%, signal=27%
TCGA_GLIOBLASTOMA_COPY_NUMBER_UP	55	0.29019	1.2311	0.148876	0.274362	1	3833	tags=44%, list=29%, signal=61%
BIOCARTA_TNFR2_PATHWAY	18	0.376192	1.22993	0.20197	0.275909	1	1818	tags=39%, list=14%, signal=45%
FIGUEROA_AML_METHYLATION_CLUSTER_6_UP	90	0.263582	1.2283	0.104575	0.278103	1	2015	tags=24%, list=15%, signal=29%
BUCKANOVICH_T_LYMPHOCYTE_HOMING_ON_TUMOR_UP	19	0.381793	1.22792	0.191748	0.278473	1	2621	tags=47%, list=20%, signal=59%
KYNG_WERNER_SYNDROM_AND_NORMAL_AGING_UP	75	0.272092	1.22724	0.127424	0.279212	1	2305	tags=29%, list=17%, signal=35%
WANG_PROSTATE_CANCER_ANDROGEN_INDEPENDENT	54	0.29138	1.22677	0.145161	0.279689	1	2258	tags=33%, list=17%, signal=40%
PID_INSULIN_PATHWAY	41	0.313237	1.22658	0.13941	0.279762	1	2007	tags=27%, list=15%, signal=31%
ST_ERK1_ERK2_MAPK_PATHWAY	30	0.337565	1.22626	0.153846	0.280036	1	2568	tags=33%, list=19%, signal=41%
FUJII_YBX1_TARGETS_DN	159	0.239902	1.22421	0.0756579	0.28292	1	2240	tags=21%, list=17%, signal=25%
PID_AURORA_B_PATHWAY	34	0.331549	1.2242	0.168342	0.282688	1	4020	tags=50%, list=30%, signal=71%
ZHAN_MULTIPLE_MYELOMA_CD1_DN	32	0.337252	1.22389	0.176328	0.282919	1	920	tags=22%, list=7%, signal=23%
MUELLER_COMMON_TARGETS_OF_AML_FUSIONS_DN	24	0.347171	1.22259	0.192308	0.284757	1	2595	tags=38%, list=19%, signal=46%
KEGG_PROTEIN_EXPORT	17	0.393653	1.22236	0.198044	0.284875	1	3081	tags=41%, list=23%, signal=53%
WAMUNYOKOLI_OVARIAN_CANCER_GRADES_1_2_DN	50	0.299756	1.22205	0.140496	0.28512	1	1067	tags=18%, list=8%, signal=19%
MORI_PRE_BI_LYMPHOCYTE_UP	67	0.276331	1.22101	0.15562	0.286533	1	2916	tags=33%, list=22%, signal=42%
WU_APOPTOSIS_BY_CDKN1A_VIA_TP53	45	0.303097	1.22012	0.159892	0.287704	1	3363	tags=42%, list=25%, signal=56%
TOMLINS_METASTASIS_DN	16	0.392439	1.22001	0.217703	0.287647	1	2416	tags=38%, list=18%, signal=46%
FARMER_BREAST_CANCER_CLUSTER_2	31	0.326212	1.22	0.168831	0.287405	1	3055	tags=32%, list=23%, signal=42%
PID_TGFBR_PATHWAY	49	0.299756	1.21996	0.146341	0.287247	1	1989	tags=27%, list=15%, signal=31%
PID_TRKR_PATHWAY	58	0.282188	1.21934	0.149171	0.287909	1	1388	tags=19%, list=10%, signal=21%
SHETH_LIVER_CANCER_VS_TXNIP_LOSS_PAM1	164	0.235789	1.2188	0.0808081	0.288504	1	1274	tags=16%, list=10%, signal=17%
CREIGHTON_ENDOCRINE_THERAPY_RESISTANCE_4	207	0.233127	1.21761	0.0466926	0.29011	1	2507	tags=25%, list=19%, signal=30%
FLECHNER_PBL_KIDNEY_TRANSPLANT_OK_VS_DONOR_DN	36	0.313837	1.21759	0.176471	0.289886	1	2582	tags=33%, list=19%, signal=41%
DARWICHE_PAPILLOMA_RISK_HIGH_UP	103	0.256441	1.21646	0.0965909	0.291451	1	1722	tags=19%, list=13%, signal=22%
SCHUHMACHER_MYC_TARGETS_UP	70	0.279782	1.21619	0.140351	0.291623	1	3383	tags=36%, list=25%, signal=48%
COLIN_PILOCYTIC_ASTROCYTOMA_VS_GLIOBLASTOMA_DN	25	0.342155	1.21576	0.185	0.29206	1	1501	tags=20%, list=11%, signal=22%
CHIANG_LIVER_CANCER_SUBCLASS_PROLIFERATION_UP	130	0.244762	1.2141	0.0903427	0.294486	1	3357	tags=35%, list=25%, signal=47%
GENTLES_LEUKEMIC_STEM_CELL_UP	21	0.370028	1.21405	0.214099	0.294303	1	1202	tags=24%, list=9%, signal=26%
REACTOME_DOWNREGULATION_OF_SMAD2_3_SMAD4_TRANSCRIPTIONAL_ACTIVITY	17	0.385415	1.21403	0.206388	0.294077	1	3518	tags=53%, list=26%, signal=72%
REACTOME_APC_C_CDC20_MEDIATED_DEGRADATION_OF_MITOTIC_PROTEINS	58	0.284315	1.21402	0.119891	0.293848	1	3920	tags=50%, list=29%, signal=71%
LEE_METASTASIS_AND_ALTERNATIVE_SPLICING_UP	64	0.278489	1.21324	0.142132	0.294835	1	2573	tags=33%, list=19%, signal=40%
PUJANA_BREAST_CANCER_WITH_BRCA1_MUTATED_UP	49	0.301618	1.21316	0.181818	0.29473	1	3369	tags=41%, list=25%, signal=54%
ASTON_MAJOR_DEPRESSIVE_DISORDER_DN	145	0.239086	1.21279	0.0811688	0.295062	1	1939	tags=22%, list=15%, signal=26%
BIOCARTA_NO1_PATHWAY	27	0.340949	1.21272	0.196931	0.294916	1	1950	tags=30%, list=15%, signal=35%
RICKMAN_TUMOR_DIFFERENTIATED_MODERATELY_VS_POORLY_UP	88	0.262446	1.21242	0.112179	0.295114	1	1443	tags=19%, list=11%, signal=22%
KEGG_RIG_I_LIKE_RECEPTOR_SIGNALING_PATHWAY	63	0.27932	1.21156	0.152174	0.296236	1	1562	tags=21%, list=12%, signal=23%
FAELT_B_CLL_WITH_VH_REARRANGEMENTS_DN	41	0.302692	1.20908	0.182045	0.299987	1	1953	tags=22%, list=15%, signal=26%
REACTOME_INFLUENZA_VIRAL_RNA_TRANSCRIPTION_AND_REPLICATION	92	0.255345	1.20905	0.104348	0.299786	1	3467	tags=34%, list=26%, signal=45%
GOBERT_OLIGODENDROCYTE_DIFFERENTIATION_UP	384	0.212555	1.20888	0.0216216	0.299816	1	3117	tags=28%, list=23%, signal=36%
MOROSETTI_FACIOSCAPULOHUMERAL_MUSCULAR_DISTROPHY_UP	20	0.370095	1.20846	0.180095	0.300311	1	2563	tags=40%, list=19%, signal=49%
BLUM_RESPONSE_TO_SALIRASIB_DN	307	0.217268	1.20805	0.0541667	0.300684	1	2604	tags=27%, list=20%, signal=33%
RATTENBACHER_BOUND_BY_CELF1	270	0.218483	1.20785	0.0297872	0.30075	1	2973	tags=29%, list=22%, signal=37%
KANG_GIST_WITH_PDGFRA_UP	45	0.305803	1.20722	0.192635	0.301466	1	3262	tags=38%, list=24%, signal=50%
SHAFFER_IRF4_TARGETS_IN_PLASMA_CELL_VS_MATURE_B_LYMPHOCYTE	63	0.278111	1.20709	0.163488	0.30144	1	582	tags=13%, list=4%, signal=13%
SHIN_B_CELL_LYMPHOMA_CLUSTER_5	17	0.385683	1.20678	0.21134	0.301713	1	3929	tags=59%, list=29%, signal=83%
STEIN_ESRRA_TARGETS_RESPONSIVE_TO_ESTROGEN_UP	27	0.339204	1.20617	0.195373	0.302485	1	1883	tags=26%, list=14%, signal=30%
MARCINIAK_ER_STRESS_RESPONSE_VIA_CHOP	21	0.368978	1.20539	0.209476	0.303526	1	1891	tags=29%, list=14%, signal=33%
PID_ARF6_DOWNSTREAM_PATHWAY	15	0.389852	1.20537	0.202765	0.303308	1	106	tags=13%, list=1%, signal=13%
REACTOME_ANTIGEN_PROCESSING_UBIQUITINATION_PROTEASOME_DEGRADATION	153	0.23493	1.20498	0.08	0.303652	1	2980	tags=31%, list=22%, signal=39%
BURTON_ADIPOGENESIS_8	69	0.266259	1.20485	0.137157	0.303617	1	3033	tags=35%, list=23%, signal=45%
BROWNE_HCMV_INFECTION_12HR_UP	92	0.253194	1.20403	0.118812	0.304662	1	2622	tags=28%, list=20%, signal=35%
UEDA_CENTRAL_CLOCK	72	0.268808	1.2033	0.158824	0.305602	1	2584	tags=29%, list=19%, signal=36%
RAO_BOUND_BY_SALL4_ISOFORM_A	113	0.248255	1.20314	0.0994152	0.305606	1	2686	tags=27%, list=20%, signal=34%
NOUZOVA_METHYLATED_IN_APL	42	0.29812	1.20291	0.188366	0.305723	1	1192	tags=21%, list=9%, signal=23%
SCHAEFFER_PROSTATE_DEVELOPMENT_12HR_DN	46	0.297303	1.20245	0.181102	0.306217	1	2376	tags=30%, list=18%, signal=37%
PANGAS_TUMOR_SUPPRESSION_BY_SMAD1_AND_SMAD5_DN	111	0.247527	1.20203	0.145455	0.306651	1	1972	tags=22%, list=15%, signal=25%
HEDENFALK_BREAST_CANCER_BRCA1_VS_BRCA2	139	0.236515	1.20168	0.0930233	0.306972	1	2139	tags=24%, list=16%, signal=28%
COATES_MACROPHAGE_M1_VS_M2_DN	51	0.292589	1.20122	0.178161	0.307481	1	1443	tags=22%, list=11%, signal=24%
SCHURINGA_STAT5A_TARGETS_DN	15	0.394295	1.19976	0.224771	0.309606	1	1182	tags=27%, list=9%, signal=29%
GRAESSMANN_RESPONSE_TO_MC_AND_SERUM_DEPRIVATION_UP	156	0.236821	1.19925	0.111111	0.310217	1	2372	tags=26%, list=18%, signal=32%
LEE_AGING_NEOCORTEX_UP	78	0.264588	1.19917	0.141643	0.310094	1	2300	tags=27%, list=17%, signal=32%
DUNNE_TARGETS_OF_AML1_MTG8_FUSION_DN	18	0.370677	1.19909	0.218978	0.309966	1	3258	tags=56%, list=24%, signal=73%
BROWNE_HCMV_INFECTION_48HR_DN	450	0.205694	1.19899	0.031746	0.309878	1	1687	tags=18%, list=13%, signal=20%
MARIADASON_REGULATED_BY_HISTONE_ACETYLATION_DN	32	0.309891	1.1989	0.168766	0.309773	1	2007	tags=28%, list=15%, signal=33%
IKEDA_MIR133_TARGETS_UP	41	0.301871	1.19886	0.164384	0.309596	1	2634	tags=32%, list=20%, signal=39%
REACTOME_REGULATION_OF_MITOTIC_CELL_CYCLE	69	0.268636	1.19836	0.137615	0.310103	1	3920	tags=46%, list=29%, signal=65%
MIKKELSEN_NPC_LCP_WITH_H3K4ME3	38	0.307975	1.1983	0.181818	0.309936	1	1760	tags=21%, list=13%, signal=24%
FRASOR_RESPONSE_TO_ESTRADIOL_DN	77	0.265769	1.1982	0.151057	0.309856	1	1067	tags=16%, list=8%, signal=17%
REACTOME_ADAPTIVE_IMMUNE_SYSTEM	419	0.205859	1.19776	0.02	0.31031	1	2994	tags=29%, list=22%, signal=36%
HELLER_SILENCED_BY_METHYLATION_UP	256	0.219132	1.19708	0.0740741	0.311143	1	2779	tags=26%, list=21%, signal=32%
KEGG_TOLL_LIKE_RECEPTOR_SIGNALING_PATHWAY	95	0.252265	1.19674	0.137931	0.311462	1	1562	tags=19%, list=12%, signal=21%
SUH_COEXPRESSED_WITH_ID1_AND_ID2_UP	15	0.390181	1.19613	0.221445	0.312215	1	1658	tags=27%, list=12%, signal=30%
PROVENZANI_METASTASIS_DN	126	0.242494	1.19537	0.142395	0.31322	1	2843	tags=27%, list=21%, signal=34%
SARTIPY_BLUNTED_BY_INSULIN_RESISTANCE_UP	16	0.383547	1.19524	0.242574	0.313198	1	3146	tags=50%, list=24%, signal=65%
NIELSEN_GIST_AND_SYNOVIAL_SARCOMA_DN	19	0.362798	1.19512	0.199519	0.313124	1	621	tags=21%, list=5%, signal=22%
SUZUKI_RESPONSE_TO_TSA	15	0.391474	1.19437	0.23399	0.314227	1	3285	tags=53%, list=25%, signal=71%
STEARMAN_LUNG_CANCER_EARLY_VS_LATE_DN	50	0.285502	1.19305	0.160221	0.316139	1	2555	tags=40%, list=19%, signal=49%
DOUGLAS_BMI1_TARGETS_UP	410	0.208959	1.19279	0.0274725	0.316277	1	2226	tags=24%, list=17%, signal=28%
LABBE_TARGETS_OF_TGFB1_AND_WNT3A_UP	98	0.24812	1.19134	0.115727	0.318523	1	3237	tags=38%, list=24%, signal=50%
ALONSO_METASTASIS_EMT_UP	29	0.326487	1.1907	0.191601	0.319384	1	2169	tags=34%, list=16%, signal=41%
BAKKER_FOXO3_TARGETS_DN	124	0.243868	1.1906	0.129338	0.319331	1	2619	tags=28%, list=20%, signal=35%
PLASARI_NFIC_TARGETS_BASAL_DN	15	0.392625	1.19025	0.244949	0.319649	1	2167	tags=47%, list=16%, signal=56%
FARDIN_HYPOXIA_11	24	0.340692	1.19006	0.215881	0.319713	1	2475	tags=42%, list=19%, signal=51%
BIOCARTA_TH1TH2_PATHWAY	19	0.362089	1.18972	0.215496	0.319998	1	2499	tags=32%, list=19%, signal=39%
MURAKAMI_UV_RESPONSE_1HR_UP	15	0.391605	1.18969	0.230415	0.319796	1	2850	tags=47%, list=21%, signal=59%
REACTOME_REGULATION_OF_INSULIN_LIKE_GROWTH_FACTOR_IGF_ACTIVITY_BY_INSULIN_LIKE_GROWTH_FACTOR_BINDING_PROTEINS_IGFBPS	16	0.379906	1.18931	0.237164	0.320216	1	1194	tags=25%, list=9%, signal=27%
FRASOR_RESPONSE_TO_ESTRADIOL_UP	37	0.31162	1.18925	0.211538	0.320062	1	2115	tags=27%, list=16%, signal=32%
REACTOME_APC_CDC20_MEDIATED_DEGRADATION_OF_NEK2A	17	0.374798	1.18831	0.2331	0.321476	1	3920	tags=65%, list=29%, signal=92%
REACTOME_SCF_BETA_TRCP_MEDIATED_DEGRADATION_OF_EMI1	46	0.288598	1.18786	0.173789	0.32196	1	3504	tags=41%, list=26%, signal=56%
KEGG_NUCLEOTIDE_EXCISION_REPAIR	42	0.29917	1.18775	0.200535	0.321862	1	1120	tags=17%, list=8%, signal=18%
BOHN_PRIMARY_IMMUNODEFICIENCY_SYNDROM_UP	40	0.301377	1.18735	0.174564	0.322305	1	3036	tags=40%, list=23%, signal=52%
VANOEVELEN_MYOGENESIS_SIN3A_TARGETS	151	0.232008	1.18707	0.131148	0.322515	1	1522	tags=18%, list=11%, signal=20%
IWANAGA_CARCINOGENESIS_BY_KRAS_PTEN_UP	117	0.245634	1.18704	0.109145	0.322325	1	2075	tags=22%, list=16%, signal=26%
MALONEY_RESPONSE_TO_17AAG_DN	68	0.266887	1.18671	0.140805	0.322641	1	3193	tags=40%, list=24%, signal=52%
RODWELL_AGING_KIDNEY_NO_BLOOD_UP	156	0.231154	1.18657	0.108108	0.32263	1	2614	tags=26%, list=20%, signal=32%
PID_CDC42_PATHWAY	64	0.266245	1.18567	0.191136	0.323889	1	2048	tags=23%, list=15%, signal=28%
KEGG_SYSTEMIC_LUPUS_ERYTHEMATOSUS	102	0.249208	1.18566	0.123529	0.323653	1	3302	tags=33%, list=25%, signal=44%
REACTOME_FORMATION_OF_THE_TERNARY_COMPLEX_AND_SUBSEQUENTLY_THE_43S_COMPLEX	35	0.313523	1.1855	0.209809	0.323677	1	3429	tags=31%, list=26%, signal=42%
CAIRO_HEPATOBLASTOMA_UP	179	0.227368	1.18491	0.0974729	0.324419	1	2110	tags=24%, list=16%, signal=28%
YAO_HOXA10_TARGETS_VIA_PROGESTERONE_DN	15	0.389867	1.18471	0.239808	0.324499	1	1113	tags=27%, list=8%, signal=29%
KEGG_INTESTINAL_IMMUNE_NETWORK_FOR_IGA_PRODUCTION	41	0.296919	1.18458	0.200483	0.324472	1	3095	tags=32%, list=23%, signal=41%
VERHAAK_AML_WITH_NPM1_MUTATED_DN	215	0.220851	1.18422	0.0916031	0.324885	1	1479	tags=17%, list=11%, signal=19%
MULLIGHAN_NPM1_MUTATED_SIGNATURE_1_UP	237	0.219243	1.18389	0.0636704	0.325172	1	2292	tags=24%, list=17%, signal=28%
AFFAR_YY1_TARGETS_DN	205	0.223063	1.18388	0.0957854	0.324952	1	2584	tags=25%, list=19%, signal=31%
SMID_BREAST_CANCER_LUMINAL_A_UP	78	0.26222	1.18347	0.164456	0.325375	1	2539	tags=33%, list=19%, signal=41%
PID_CXCR4_PATHWAY	90	0.252414	1.18345	0.146814	0.325161	1	2225	tags=27%, list=17%, signal=32%
ISHIDA_E2F_TARGETS	43	0.298063	1.18332	0.214674	0.325152	1	2595	tags=33%, list=19%, signal=40%
REACTOME_STRIATED_MUSCLE_CONTRACTION	27	0.330476	1.18305	0.208633	0.325341	1	1290	tags=22%, list=10%, signal=25%
CUI_TCF21_TARGETS_DN	24	0.33684	1.18293	0.21547	0.325293	1	796	tags=21%, list=6%, signal=22%
YAO_TEMPORAL_RESPONSE_TO_PROGESTERONE_CLUSTER_1	59	0.271998	1.18258	0.183381	0.325637	1	2279	tags=22%, list=17%, signal=26%
WANG_HCP_PROSTATE_CANCER	98	0.252376	1.18236	0.136778	0.325776	1	3232	tags=34%, list=24%, signal=44%
LIM_MAMMARY_LUMINAL_MATURE_DN	78	0.260035	1.18202	0.193146	0.326087	1	1754	tags=23%, list=13%, signal=26%
PID_ATM_PATHWAY	29	0.324587	1.18136	0.202128	0.326949	1	2516	tags=31%, list=19%, signal=38%
SATO_SILENCED_EPIGENETICALLY_IN_PANCREATIC_CANCER	42	0.297885	1.18019	0.179625	0.32877	1	1408	tags=24%, list=11%, signal=27%
SCHAEFFER_PROSTATE_DEVELOPMENT_48HR_UP	332	0.207351	1.17808	0.0704846	0.332156	1	1713	tags=17%, list=13%, signal=19%
ZHU_CMV_8_HR_DN	48	0.288013	1.17746	0.220708	0.332947	1	1649	tags=23%, list=12%, signal=26%
BARIS_THYROID_CANCER_DN	55	0.279167	1.17704	0.175439	0.333451	1	2939	tags=33%, list=22%, signal=42%
CAIRO_LIVER_DEVELOPMENT_UP	147	0.233988	1.17645	0.146667	0.334227	1	2737	tags=27%, list=21%, signal=34%
YAO_TEMPORAL_RESPONSE_TO_PROGESTERONE_CLUSTER_10	52	0.281098	1.17609	0.182065	0.334647	1	2501	tags=31%, list=19%, signal=38%
JAZAG_TGFB1_SIGNALING_VIA_SMAD4_DN	60	0.271136	1.17592	0.18806	0.334647	1	2107	tags=25%, list=16%, signal=30%
GAJATE_RESPONSE_TO_TRABECTEDIN_UP	61	0.271278	1.17565	0.193084	0.334871	1	2183	tags=25%, list=16%, signal=29%
REACTOME_CYCLIN_E_ASSOCIATED_EVENTS_DURING_G1_S_TRANSITION_	60	0.277089	1.17498	0.163842	0.335784	1	2806	tags=32%, list=21%, signal=40%
PID_IFNG_PATHWAY	37	0.301233	1.17484	0.21883	0.335739	1	1477	tags=27%, list=11%, signal=30%
YAMAZAKI_TCEB3_TARGETS_DN	160	0.225522	1.17473	0.142336	0.335692	1	2829	tags=28%, list=21%, signal=35%
HADDAD_B_LYMPHOCYTE_PROGENITOR	245	0.218627	1.17395	0.0782609	0.336838	1	3078	tags=30%, list=23%, signal=39%
GOLDRATH_HOMEOSTATIC_PROLIFERATION	127	0.235409	1.1736	0.143813	0.337249	1	1907	tags=20%, list=14%, signal=23%
FIGUEROA_AML_METHYLATION_CLUSTER_3_UP	104	0.242245	1.17353	0.141066	0.337096	1	2524	tags=29%, list=19%, signal=35%
BIOCARTA_INFLAM_PATHWAY	29	0.325704	1.17311	0.187335	0.337542	1	2499	tags=34%, list=19%, signal=42%
ULE_SPLICING_VIA_NOVA2	39	0.30136	1.17245	0.223464	0.338491	1	1852	tags=23%, list=14%, signal=27%
WINTER_HYPOXIA_DN	37	0.30871	1.17162	0.209115	0.339683	1	3095	tags=41%, list=23%, signal=53%
ALCALAY_AML_BY_NPM1_LOCALIZATION_DN	170	0.229871	1.17121	0.124088	0.340153	1	2499	tags=27%, list=19%, signal=33%
REACTOME_P53_INDEPENDENT_G1_S_DNA_DAMAGE_CHECKPOINT	46	0.287854	1.17099	0.21447	0.340359	1	2806	tags=33%, list=21%, signal=41%
PID_NFAT_TFPATHWAY	44	0.292274	1.17093	0.204482	0.340216	1	1515	tags=18%, list=11%, signal=20%
HOEBEKE_LYMPHOID_STEM_CELL_UP	82	0.256761	1.17093	0.176119	0.339954	1	1469	tags=20%, list=11%, signal=22%
VALK_AML_CLUSTER_4	25	0.336494	1.16986	0.251208	0.341508	1	2502	tags=28%, list=19%, signal=34%
MULLIGHAN_NPM1_SIGNATURE_3_UP	292	0.210581	1.16938	0.0750988	0.342077	1	2358	tags=23%, list=18%, signal=28%
CHANDRAN_METASTASIS_UP	134	0.22969	1.16917	0.14652	0.342163	1	3305	tags=37%, list=25%, signal=48%
YIH_RESPONSE_TO_ARSENITE_C4	18	0.36902	1.16906	0.232779	0.342076	1	1915	tags=28%, list=14%, signal=32%
ST_INTEGRIN_SIGNALING_PATHWAY	75	0.256995	1.16889	0.160606	0.342098	1	3102	tags=33%, list=23%, signal=43%
REACTOME_PYRIMIDINE_METABOLISM	18	0.362664	1.16834	0.253394	0.342847	1	372	tags=11%, list=3%, signal=11%
WONG_ENDMETRIUM_CANCER_UP	18	0.361434	1.16824	0.232227	0.342771	1	1990	tags=39%, list=15%, signal=46%
LABBE_WNT3A_TARGETS_UP	104	0.243214	1.16804	0.157051	0.342868	1	3632	tags=38%, list=27%, signal=52%
ZHENG_GLIOBLASTOMA_PLASTICITY_UP	201	0.22247	1.16795	0.105442	0.342805	1	2925	tags=26%, list=22%, signal=33%
MATZUK_MALE_REPRODUCTION_SERTOLI	26	0.333277	1.1676	0.210269	0.343155	1	1672	tags=31%, list=13%, signal=35%
BOYLAN_MULTIPLE_MYELOMA_D_CLUSTER_DN	33	0.310835	1.16725	0.222222	0.343505	1	1278	tags=18%, list=10%, signal=20%
PID_ARF6_PATHWAY	27	0.328647	1.16654	0.226027	0.344517	1	2044	tags=30%, list=15%, signal=35%
FLECHNER_BIOPSY_KIDNEY_TRANSPLANT_REJECTED_VS_OK_DN	490	0.201863	1.16652	0.0353535	0.344276	1	1984	tags=20%, list=15%, signal=22%
GUO_HEX_TARGETS_UP	70	0.26148	1.16643	0.168	0.344149	1	2760	tags=31%, list=21%, signal=39%
ENGELMANN_CANCER_PROGENITORS_DN	51	0.286102	1.16617	0.222222	0.344305	1	2810	tags=35%, list=21%, signal=45%
LIANG_HEMATOPOIESIS_STEM_CELL_NUMBER_LARGE_VS_TINY_UP	29	0.318949	1.1661	0.245098	0.344158	1	2312	tags=34%, list=17%, signal=42%
PAL_PRMT5_TARGETS_UP	163	0.229502	1.16609	0.097973	0.343919	1	2790	tags=25%, list=21%, signal=31%
GU_PDEF_TARGETS_DN	29	0.323757	1.16607	0.237852	0.343684	1	2065	tags=24%, list=16%, signal=29%
WU_SILENCED_BY_METHYLATION_IN_BLADDER_CANCER	52	0.284048	1.16562	0.181548	0.34422	1	2808	tags=31%, list=21%, signal=39%
SIMBULAN_PARP1_TARGETS_UP	31	0.318477	1.16559	0.210402	0.344006	1	2071	tags=26%, list=16%, signal=30%
KONG_E2F3_TARGETS	72	0.261033	1.16516	0.19375	0.344532	1	4195	tags=39%, list=31%, signal=56%
REACTOME_SIGNALING_BY_THE_B_CELL_RECEPTOR_BCR	104	0.244195	1.16511	0.169753	0.344385	1	2003	tags=23%, list=15%, signal=27%
SMID_BREAST_CANCER_NORMAL_LIKE_UP	420	0.201753	1.16459	0.0632184	0.345094	1	2899	tags=26%, list=22%, signal=32%
ST_GAQ_PATHWAY	27	0.321525	1.16455	0.2475	0.344897	1	1743	tags=30%, list=13%, signal=34%
REACTOME_AUTODEGRADATION_OF_THE_E3_UBIQUITIN_LIGASE_COP1	44	0.288549	1.16425	0.218997	0.345144	1	1728	tags=23%, list=13%, signal=26%
REACTOME_GENERIC_TRANSCRIPTION_PATHWAY	202	0.218038	1.16331	0.132013	0.346579	1	3303	tags=33%, list=25%, signal=43%
TORCHIA_TARGETS_OF_EWSR1_FLI1_FUSION_DN	236	0.216738	1.16326	0.0930233	0.346376	1	2117	tags=22%, list=16%, signal=26%
GAUSSMANN_MLL_AF4_FUSION_TARGETS_C_DN	15	0.387571	1.16322	0.270531	0.34621	1	3492	tags=53%, list=26%, signal=72%
HEDENFALK_BREAST_CANCER_BRACX_UP	19	0.346711	1.1631	0.220049	0.346165	1	3803	tags=58%, list=29%, signal=81%
MCCABE_HOXC6_TARGETS_CANCER_DN	15	0.383816	1.1621	0.253041	0.347683	1	2567	tags=33%, list=19%, signal=41%
KEGG_LONG_TERM_POTENTIATION	65	0.261291	1.16208	0.173295	0.347455	1	1978	tags=28%, list=15%, signal=32%
JAEGER_METASTASIS_DN	237	0.213154	1.16114	0.0979592	0.348869	1	1998	tags=20%, list=15%, signal=23%
GAUSSMANN_MLL_AF4_FUSION_TARGETS_F_DN	27	0.332605	1.16095	0.218182	0.348959	1	2925	tags=33%, list=22%, signal=43%
REACTOME_MITOTIC_G2_G2_M_PHASES	66	0.265818	1.16032	0.213115	0.349873	1	2212	tags=26%, list=17%, signal=31%
HOLLEMAN_VINCRISTINE_RESISTANCE_ALL_DN	18	0.367504	1.1601	0.252358	0.349996	1	3091	tags=39%, list=23%, signal=51%
IIZUKA_LIVER_CANCER_PROGRESSION_G1_G2_DN	25	0.326845	1.15988	0.230964	0.350105	1	1885	tags=28%, list=14%, signal=33%
NIELSEN_SYNOVIAL_SARCOMA_DN	17	0.381041	1.15919	0.277389	0.351085	1	3300	tags=41%, list=25%, signal=55%
RIZ_ERYTHROID_DIFFERENTIATION_6HR	26	0.327824	1.15884	0.238462	0.351443	1	1470	tags=27%, list=11%, signal=30%
KIM_ALL_DISORDERS_CALB1_CORR_UP	490	0.198311	1.15883	0.0581395	0.351189	1	1557	tags=18%, list=12%, signal=19%
CROONQUIST_NRAS_SIGNALING_DN	69	0.265956	1.15816	0.166205	0.352133	1	4020	tags=41%, list=30%, signal=58%
ABRAHAM_ALPC_VS_MULTIPLE_MYELOMA_DN	19	0.360921	1.15793	0.250646	0.352266	1	4168	tags=58%, list=31%, signal=84%
FERREIRA_EWINGS_SARCOMA_UNSTABLE_VS_STABLE_UP	118	0.238249	1.15725	0.159875	0.35331	1	2678	tags=25%, list=20%, signal=32%
REACTOME_MEIOSIS	91	0.245751	1.15676	0.171429	0.353975	1	2668	tags=27%, list=20%, signal=34%
KORKOLA_EMBRYONIC_CARCINOMA_VS_SEMINOMA_DN	17	0.363297	1.15571	0.247283	0.355664	1	737	tags=18%, list=6%, signal=19%
KEGG_ALLOGRAFT_REJECTION	34	0.307431	1.15566	0.238342	0.355506	1	3728	tags=44%, list=28%, signal=61%
GROSS_HYPOXIA_VIA_HIF1A_UP	59	0.268564	1.15499	0.210375	0.356479	1	3059	tags=36%, list=23%, signal=46%
TORCHIA_TARGETS_OF_EWSR1_FLI1_FUSION_TOP20_UP	17	0.365695	1.15473	0.27665	0.356715	1	1702	tags=35%, list=13%, signal=40%
STAMBOLSKY_RESPONSE_TO_VITAMIN_D3_UP	64	0.265409	1.15464	0.191781	0.356608	1	2454	tags=25%, list=18%, signal=30%
MAGRANGEAS_MULTIPLE_MYELOMA_IGG_VS_IGA_DN	24	0.325811	1.15454	0.25419	0.356521	1	1888	tags=25%, list=14%, signal=29%
REACTOME_MUSCLE_CONTRACTION	44	0.280864	1.15438	0.240409	0.356582	1	2233	tags=25%, list=17%, signal=30%
BIOCARTA_HIVNEF_PATHWAY	55	0.273835	1.15328	0.219577	0.358337	1	1031	tags=15%, list=8%, signal=16%
LE_EGR2_TARGETS_DN	93	0.245766	1.1511	0.217391	0.362175	1	1763	tags=22%, list=13%, signal=25%
PARK_APL_PATHOGENESIS_DN	45	0.283813	1.15041	0.222527	0.363265	1	1633	tags=22%, list=12%, signal=25%
HOEBEKE_LYMPHOID_STEM_CELL_DN	79	0.253278	1.15021	0.175227	0.363369	1	2068	tags=22%, list=16%, signal=25%
HAHTOLA_MYCOSIS_FUNGOIDES_CD4_DN	102	0.24127	1.14935	0.173633	0.364742	1	3081	tags=33%, list=23%, signal=43%
DUNNE_TARGETS_OF_AML1_MTG8_FUSION_UP	45	0.286906	1.14895	0.226667	0.365216	1	2373	tags=24%, list=18%, signal=30%
REACTOME_COLLAGEN_FORMATION	50	0.281104	1.1487	0.231405	0.365384	1	1656	tags=20%, list=12%, signal=23%
NELSON_RESPONSE_TO_ANDROGEN_DN	18	0.358072	1.14809	0.24356	0.366302	1	972	tags=17%, list=7%, signal=18%
BERTUCCI_MEDULLARY_VS_DUCTAL_BREAST_CANCER_DN	115	0.235363	1.14746	0.180758	0.367187	1	2851	tags=34%, list=21%, signal=43%
TAVAZOIE_METASTASIS	93	0.246536	1.14686	0.177143	0.368106	1	1679	tags=20%, list=13%, signal=23%
BENPORATH_PROLIFERATION	114	0.234202	1.14669	0.16358	0.368184	1	3369	tags=37%, list=25%, signal=49%
REACTOME_FANCONI_ANEMIA_PATHWAY	15	0.379381	1.14667	0.279012	0.367946	1	1131	tags=27%, list=8%, signal=29%
ZHENG_FOXP3_TARGETS_IN_T_LYMPHOCYTE_DN	29	0.309864	1.14627	0.251232	0.368425	1	2115	tags=24%, list=16%, signal=29%
XU_HGF_TARGETS_INDUCED_BY_AKT1_48HR_DN	22	0.34407	1.14521	0.241379	0.370121	1	2436	tags=32%, list=18%, signal=39%
WANG_RESPONSE_TO_GSK3_INHIBITOR_SB216763_UP	216	0.213039	1.14493	0.132075	0.370339	1	3316	tags=31%, list=25%, signal=41%
REACTOME_CYTOSOLIC_TRNA_AMINOACYLATION	20	0.345852	1.14485	0.264151	0.370221	1	2146	tags=30%, list=16%, signal=36%
REACTOME_LOSS_OF_NLP_FROM_MITOTIC_CENTROSOMES	45	0.281882	1.1443	0.25	0.371068	1	2194	tags=27%, list=16%, signal=32%
KEGG_O_GLYCAN_BIOSYNTHESIS	19	0.348043	1.14391	0.276888	0.371531	1	1955	tags=37%, list=15%, signal=43%
RAGHAVACHARI_PLATELET_SPECIFIC_GENES	64	0.25689	1.14318	0.210667	0.372672	1	1737	tags=23%, list=13%, signal=27%
BIOCARTA_GCR_PATHWAY	19	0.353525	1.14201	0.26601	0.374606	1	3837	tags=53%, list=29%, signal=74%
REACTOME_SIGNAL_TRANSDUCTION_BY_L1	33	0.29593	1.13963	0.260546	0.378895	1	2172	tags=24%, list=16%, signal=29%
MIKKELSEN_IPS_ICP_WITH_H3K4ME3_AND_H327ME3	72	0.254055	1.13903	0.215909	0.379749	1	2826	tags=31%, list=21%, signal=39%
PID_IL8_CXCR2_PATHWAY	29	0.311905	1.13881	0.256039	0.379884	1	2225	tags=34%, list=17%, signal=41%
LAU_APOPTOSIS_CDKN2A_UP	55	0.271322	1.13876	0.247887	0.379726	1	1055	tags=18%, list=8%, signal=20%
REACTOME_SCFSKP2_MEDIATED_DEGRADATION_OF_P27_P21	51	0.270142	1.13874	0.258486	0.379475	1	2806	tags=31%, list=21%, signal=40%
REACTOME_HDL_MEDIATED_LIPID_TRANSPORT	15	0.372746	1.13843	0.291469	0.379778	1	1386	tags=27%, list=10%, signal=30%
KEGG_GAP_JUNCTION	73	0.251489	1.13828	0.1875	0.379821	1	1601	tags=25%, list=12%, signal=28%
PID_FGF_PATHWAY	52	0.271323	1.13786	0.224324	0.380396	1	1915	tags=25%, list=14%, signal=29%
HUNSBERGER_EXERCISE_REGULATED_GENES	30	0.307745	1.1374	0.261084	0.380994	1	2063	tags=27%, list=15%, signal=31%
SCHEIDEREIT_IKK_TARGETS	15	0.362156	1.13715	0.264286	0.381255	1	2358	tags=33%, list=18%, signal=40%
AIYAR_COBRA1_TARGETS_UP	35	0.297515	1.13684	0.259067	0.381575	1	1715	tags=23%, list=13%, signal=26%
DANG_MYC_TARGETS_UP	120	0.232196	1.13644	0.164983	0.382	1	3369	tags=31%, list=25%, signal=41%
DURAND_STROMA_S_UP	215	0.213653	1.13611	0.146825	0.382412	1	2208	tags=26%, list=17%, signal=31%
SHETH_LIVER_CANCER_VS_TXNIP_LOSS_PAM2	115	0.233369	1.13584	0.176849	0.382621	1	2463	tags=29%, list=18%, signal=35%
LU_TUMOR_VASCULATURE_UP	25	0.322153	1.13541	0.275	0.383187	1	2183	tags=32%, list=16%, signal=38%
WINNEPENNINCKX_MELANOMA_METASTASIS_DN	33	0.300371	1.13501	0.265625	0.383686	1	2693	tags=39%, list=20%, signal=49%
SPIELMAN_LYMPHOBLAST_EUROPEAN_VS_ASIAN_2FC_DN	19	0.351579	1.13478	0.270335	0.383864	1	2086	tags=32%, list=16%, signal=37%
WANG_TUMOR_INVASIVENESS_UP	304	0.205091	1.13461	0.120155	0.383951	1	2812	tags=27%, list=21%, signal=33%
REACTOME_INFLUENZA_LIFE_CYCLE	125	0.231735	1.13421	0.169279	0.384495	1	3467	tags=32%, list=26%, signal=43%
ZWANG_EGF_INTERVAL_UP	50	0.269625	1.13394	0.227778	0.38477	1	1122	tags=20%, list=8%, signal=22%
PID_P53_DOWNSTREAM_PATHWAY	116	0.231617	1.1313	0.169329	0.389701	1	1560	tags=18%, list=12%, signal=20%
PID_SYNDECAN_3_PATHWAY	15	0.37801	1.13117	0.283019	0.389701	1	918	tags=27%, list=7%, signal=29%
IWANAGA_CARCINOGENESIS_BY_KRAS_PTEN_DN	240	0.208518	1.13	0.155738	0.391732	1	1561	tags=17%, list=12%, signal=19%
SCHRAMM_INHBA_TARGETS_DN	24	0.329675	1.12972	0.284337	0.391978	1	1830	tags=33%, list=14%, signal=39%
KYNG_WERNER_SYNDROM_AND_NORMAL_AGING_DN	173	0.222724	1.12963	0.151515	0.391881	1	3445	tags=34%, list=26%, signal=45%
ACEVEDO_LIVER_CANCER_WITH_H3K27ME3_UP	176	0.218307	1.12949	0.188755	0.391883	1	2638	tags=29%, list=20%, signal=36%
YUAN_ZNF143_PARTNERS	15	0.374152	1.12948	0.307888	0.391621	1	1112	tags=27%, list=8%, signal=29%
MARKEY_RB1_CHRONIC_LOF_DN	94	0.239795	1.12885	0.19943	0.392605	1	2257	tags=24%, list=17%, signal=29%
MASSARWEH_TAMOXIFEN_RESISTANCE_DN	172	0.216637	1.12844	0.162069	0.393163	1	1883	tags=19%, list=14%, signal=22%
HOLLEMAN_ASPARAGINASE_RESISTANCE_B_ALL_UP	22	0.332682	1.12743	0.279236	0.394856	1	2939	tags=41%, list=22%, signal=52%
CHIANG_LIVER_CANCER_SUBCLASS_UNANNOTATED_UP	58	0.263834	1.12699	0.26	0.395459	1	3043	tags=34%, list=23%, signal=44%
REACTOME_PLATELET_ACTIVATION_SIGNALING_AND_AGGREGATION	178	0.218449	1.1269	0.142857	0.395324	1	2061	tags=21%, list=15%, signal=25%
GAL_LEUKEMIC_STEM_CELL_DN	214	0.209746	1.12682	0.144531	0.395184	1	2541	tags=24%, list=19%, signal=30%
HOLLMANN_APOPTOSIS_VIA_CD40_UP	174	0.218699	1.12674	0.161812	0.395067	1	2134	tags=23%, list=16%, signal=27%
TAKEDA_TARGETS_OF_NUP98_HOXA9_FUSION_8D_DN	157	0.221349	1.12663	0.191558	0.395031	1	2223	tags=22%, list=17%, signal=26%
PID_HDAC_CLASSI_PATHWAY	57	0.256901	1.12488	0.235821	0.398152	1	2110	tags=25%, list=16%, signal=29%
LI_AMPLIFIED_IN_LUNG_CANCER	170	0.218943	1.12479	0.192171	0.398038	1	2944	tags=31%, list=22%, signal=40%
REACTOME_VIF_MEDIATED_DEGRADATION_OF_APOBEC3G	47	0.281219	1.12474	0.27027	0.397882	1	1728	tags=23%, list=13%, signal=27%
MORI_PRE_BI_LYMPHOCYTE_DN	53	0.270271	1.12415	0.259375	0.398761	1	2008	tags=28%, list=15%, signal=33%
WONG_ENDMETRIUM_CANCER_DN	59	0.262817	1.12336	0.243553	0.400019	1	2162	tags=25%, list=16%, signal=30%
BIOCARTA_TCR_PATHWAY	43	0.279163	1.12327	0.252078	0.399914	1	1915	tags=23%, list=14%, signal=27%
DAVICIONI_MOLECULAR_ARMS_VS_ERMS_DN	154	0.217141	1.12296	0.187279	0.400281	1	1285	tags=16%, list=10%, signal=17%
AMIT_EGF_RESPONSE_40_MCF10A	18	0.345032	1.12267	0.274272	0.400575	1	2962	tags=39%, list=22%, signal=50%
LU_TUMOR_ENDOTHELIAL_MARKERS_UP	18	0.351729	1.12242	0.305085	0.400829	1	4084	tags=56%, list=31%, signal=80%
MARSON_FOXP3_TARGETS_UP	55	0.26689	1.12122	0.264463	0.402962	1	2366	tags=29%, list=18%, signal=35%
BURTON_ADIPOGENESIS_3	87	0.239101	1.12115	0.224852	0.402823	1	4470	tags=45%, list=34%, signal=67%
KEGG_REGULATION_OF_ACTIN_CYTOSKELETON	181	0.214633	1.12094	0.180212	0.403005	1	2812	tags=28%, list=21%, signal=35%
KANG_FLUOROURACIL_RESISTANCE_UP	21	0.338189	1.12076	0.281013	0.403064	1	2071	tags=24%, list=16%, signal=28%
PID_NFKAPPAB_ATYPICAL_PATHWAY	16	0.359142	1.12066	0.276961	0.402969	1	1485	tags=25%, list=11%, signal=28%
PID_LYMPH_ANGIOGENESIS_PATHWAY	24	0.326199	1.12031	0.284672	0.403406	1	2172	tags=38%, list=16%, signal=45%
PID_PDGFRB_PATHWAY	117	0.229331	1.12021	0.191824	0.403363	1	1553	tags=20%, list=12%, signal=22%
QI_PLASMACYTOMA_UP	232	0.207763	1.11988	0.144404	0.403714	1	2089	tags=19%, list=16%, signal=22%
LIAO_HAVE_SOX4_BINDING_SITES	32	0.302352	1.119	0.284238	0.405193	1	3657	tags=56%, list=27%, signal=77%
MITSIADES_RESPONSE_TO_APLIDIN_DN	213	0.210283	1.11836	0.166023	0.406159	1	3369	tags=31%, list=25%, signal=40%
YEGNASUBRAMANIAN_PROSTATE_CANCER	110	0.232861	1.11764	0.198251	0.407254	1	3183	tags=32%, list=24%, signal=41%
REACTOME_FORMATION_OF_TRANSCRIPTION_COUPLED_NER_TC_NER_REPAIR_COMPLEX	27	0.320426	1.11649	0.295843	0.409327	1	854	tags=15%, list=6%, signal=16%
GENTILE_UV_RESPONSE_CLUSTER_D7	36	0.289295	1.116	0.25266	0.410008	1	2735	tags=25%, list=21%, signal=31%
KEGG_BIOSYNTHESIS_OF_UNSATURATED_FATTY_ACIDS	18	0.353114	1.11579	0.295122	0.41016	1	2354	tags=33%, list=18%, signal=40%
PEREZ_TP53_AND_TP63_TARGETS	136	0.226353	1.11575	0.208609	0.409957	1	2643	tags=29%, list=20%, signal=36%
DARWICHE_PAPILLOMA_RISK_LOW_UP	115	0.228307	1.11435	0.251553	0.412539	1	1658	tags=18%, list=12%, signal=21%
BRUINS_UVC_RESPONSE_EARLY_LATE	205	0.209164	1.11262	0.165385	0.415854	1	2486	tags=24%, list=19%, signal=30%
CREIGHTON_ENDOCRINE_THERAPY_RESISTANCE_1	356	0.197315	1.11234	0.117904	0.416096	1	3035	tags=28%, list=23%, signal=35%
LUI_THYROID_CANCER_CLUSTER_1	46	0.276469	1.11218	0.289544	0.416132	1	2664	tags=28%, list=20%, signal=35%
MARTIN_INTERACT_WITH_HDAC	41	0.282773	1.11214	0.250712	0.41596	1	2115	tags=24%, list=16%, signal=29%
NING_CHRONIC_OBSTRUCTIVE_PULMONARY_DISEASE_UP	134	0.223624	1.1121	0.20678	0.415749	1	1587	tags=18%, list=12%, signal=20%
PID_WNT_SIGNALING_PATHWAY	23	0.329578	1.112	0.304569	0.415647	1	3206	tags=39%, list=24%, signal=51%
GAVIN_FOXP3_TARGETS_CLUSTER_P4	75	0.246483	1.11199	0.217617	0.41538	1	659	tags=12%, list=5%, signal=13%
BIOCARTA_AGR_PATHWAY	33	0.293237	1.11189	0.28125	0.415306	1	1136	tags=24%, list=9%, signal=26%
SCHAEFFER_PROSTATE_DEVELOPMENT_6HR_DN	377	0.194995	1.11026	0.122549	0.418433	1	2155	tags=21%, list=16%, signal=25%
BIOCARTA_CD40_PATHWAY	15	0.365413	1.10974	0.331754	0.419202	1	2836	tags=47%, list=21%, signal=59%
NIELSEN_GIST	72	0.249218	1.10924	0.259259	0.419903	1	1513	tags=19%, list=11%, signal=22%
BAE_BRCA1_TARGETS_UP	68	0.253954	1.10844	0.259939	0.421225	1	2126	tags=25%, list=16%, signal=30%
LEE_RECENT_THYMIC_EMIGRANT	140	0.219892	1.10826	0.201987	0.421346	1	3238	tags=33%, list=24%, signal=43%
REACTOME_ENDOSOMAL_SORTING_COMPLEX_REQUIRED_FOR_TRANSPORT_ESCRT	18	0.346274	1.10824	0.316397	0.421093	1	1385	tags=33%, list=10%, signal=37%
REACTOME_CELL_SURFACE_INTERACTIONS_AT_THE_VASCULAR_WALL	82	0.241103	1.10737	0.233803	0.422646	1	1388	tags=21%, list=10%, signal=23%
PAPASPYRIDONOS_UNSTABLE_ATEROSCLEROTIC_PLAQUE_DN	37	0.287646	1.10654	0.304582	0.424089	1	2477	tags=30%, list=19%, signal=36%
BIOCARTA_UCALPAIN_PATHWAY	15	0.360469	1.10652	0.302381	0.423851	1	2061	tags=40%, list=15%, signal=47%
PID_TCR_PATHWAY	59	0.258046	1.10574	0.264881	0.425114	1	2007	tags=27%, list=15%, signal=32%
ROVERSI_GLIOMA_COPY_NUMBER_DN	40	0.280268	1.10503	0.286472	0.426343	1	3226	tags=38%, list=24%, signal=49%
PID_MYC_PATHWAY	23	0.331678	1.10373	0.301205	0.428808	1	4437	tags=48%, list=33%, signal=72%
CHYLA_CBFA2T3_TARGETS_DN	154	0.215187	1.1028	0.215753	0.430472	1	1941	tags=19%, list=15%, signal=23%
LINDGREN_BLADDER_CANCER_CLUSTER_1_DN	296	0.198154	1.10271	0.189189	0.430387	1	1923	tags=18%, list=14%, signal=20%
REACTOME_ER_PHAGOSOME_PATHWAY	56	0.264526	1.10258	0.273713	0.430362	1	2806	tags=29%, list=21%, signal=36%
PUJANA_BRCA2_PCC_NETWORK	375	0.194644	1.10251	0.149485	0.430225	1	3139	tags=29%, list=24%, signal=36%
WARTERS_RESPONSE_TO_IR_SKIN	49	0.26479	1.10227	0.297222	0.430436	1	1704	tags=20%, list=13%, signal=23%
MIKKELSEN_NPC_ICP_WITH_H3K4ME3	274	0.200288	1.10152	0.173387	0.431724	1	2160	tags=21%, list=16%, signal=24%
RIZ_ERYTHROID_DIFFERENTIATION_HBZ	34	0.289247	1.09978	0.326425	0.435122	1	319	tags=12%, list=2%, signal=12%
FALVELLA_SMOKERS_WITH_LUNG_CANCER	62	0.255475	1.09975	0.26615	0.43489	1	2356	tags=26%, list=18%, signal=31%
BIOCARTA_CYTOKINE_PATHWAY	21	0.3286	1.09938	0.320366	0.435416	1	2201	tags=33%, list=17%, signal=40%
FRASOR_RESPONSE_TO_SERM_OR_FULVESTRANT_UP	19	0.335397	1.09859	0.304878	0.436811	1	2424	tags=21%, list=18%, signal=26%
LI_WILMS_TUMOR	26	0.317595	1.0984	0.318735	0.436947	1	1276	tags=27%, list=10%, signal=30%
PID_TELOMERASE_PATHWAY	62	0.254118	1.09772	0.303977	0.438124	1	3048	tags=35%, list=23%, signal=46%
RIGGI_EWING_SARCOMA_PROGENITOR_UP	313	0.195605	1.09678	0.184426	0.439867	1	3259	tags=33%, list=24%, signal=43%
FOURNIER_ACINAR_DEVELOPMENT_EARLY_UP	18	0.344702	1.09664	0.315668	0.439869	1	4021	tags=50%, list=30%, signal=72%
KEGG_CELL_ADHESION_MOLECULES_CAMS	115	0.224657	1.09658	0.237624	0.439686	1	1366	tags=15%, list=10%, signal=16%
KEGG_HOMOLOGOUS_RECOMBINATION	25	0.316241	1.09653	0.30402	0.43948	1	1049	tags=20%, list=8%, signal=22%
PAL_PRMT5_TARGETS_DN	25	0.312195	1.09632	0.300971	0.439659	1	1941	tags=32%, list=15%, signal=37%
TIEN_INTESTINE_PROBIOTICS_24HR_UP	486	0.187106	1.09485	0.130435	0.442436	1	2619	tags=24%, list=20%, signal=29%
XU_GH1_AUTOCRINE_TARGETS_UP	179	0.211551	1.09452	0.221805	0.442841	1	1278	tags=15%, list=10%, signal=16%
RAY_TUMORIGENESIS_BY_ERBB2_CDC25A_DN	120	0.226463	1.09444	0.256757	0.442727	1	2725	tags=28%, list=20%, signal=34%
JISON_SICKLE_CELL_DISEASE_DN	146	0.218208	1.094	0.242038	0.443378	1	2575	tags=24%, list=19%, signal=29%
REACTOME_APC_C_CDH1_MEDIATED_DEGRADATION_OF_CDC20_AND_OTHER_APC_C_CDH1_TARGETED_PROTEINS_IN_LATE_MITOSIS_EARLY_G1	58	0.259023	1.09362	0.285714	0.443943	1	2916	tags=33%, list=22%, signal=42%
WEST_ADRENOCORTICAL_TUMOR_MARKERS_UP	19	0.336496	1.09316	0.342995	0.444611	1	2144	tags=26%, list=16%, signal=31%
PID_REELIN_PATHWAY	29	0.293488	1.09241	0.30203	0.445979	1	1593	tags=28%, list=12%, signal=31%
CONRAD_STEM_CELL	30	0.297862	1.09233	0.289189	0.445863	1	73	tags=10%, list=1%, signal=10%
BIOCARTA_CDMAC_PATHWAY	15	0.355401	1.09231	0.308824	0.445592	1	2449	tags=33%, list=18%, signal=41%
KEGG_THYROID_CANCER	29	0.302553	1.09226	0.327456	0.445425	1	1767	tags=28%, list=13%, signal=32%
ROSS_ACUTE_MYELOID_LEUKEMIA_CBF	70	0.244397	1.09174	0.287324	0.446265	1	641	tags=13%, list=5%, signal=13%
REACTOME_SYNTHESIS_OF_BILE_ACIDS_AND_BILE_SALTS	17	0.350986	1.09157	0.348946	0.446321	1	4746	tags=59%, list=36%, signal=91%
JI_RESPONSE_TO_FSH_UP	67	0.24484	1.09128	0.259819	0.446686	1	2619	tags=27%, list=20%, signal=33%
KAUFFMANN_MELANOMA_RELAPSE_UP	52	0.262962	1.0904	0.307463	0.44833	1	3974	tags=40%, list=30%, signal=57%
LI_LUNG_CANCER	40	0.277571	1.09003	0.307292	0.448839	1	1785	tags=23%, list=13%, signal=26%
AMUNDSON_POOR_SURVIVAL_AFTER_GAMMA_RADIATION_8G	87	0.236659	1.08968	0.281159	0.449278	1	1569	tags=17%, list=12%, signal=19%
MORI_LARGE_PRE_BII_LYMPHOCYTE_DN	47	0.268425	1.08935	0.316216	0.449723	1	2198	tags=30%, list=17%, signal=36%
MARSON_FOXP3_CORE_DIRECT_TARGETS	16	0.354753	1.08932	0.338308	0.449488	1	2736	tags=38%, list=21%, signal=47%
IVANOVA_HEMATOPOIESIS_STEM_CELL_LONG_TERM	199	0.205554	1.08917	0.217857	0.449524	1	2167	tags=21%, list=16%, signal=25%
REACTOME_AUTODEGRADATION_OF_CDH1_BY_CDH1_APC_C	51	0.26078	1.08904	0.270655	0.449511	1	2916	tags=33%, list=22%, signal=43%
VECCHI_GASTRIC_CANCER_EARLY_UP	297	0.195616	1.08899	0.192	0.449316	1	2497	tags=23%, list=19%, signal=28%
KYNG_ENVIRONMENTAL_STRESS_RESPONSE_NOT_BY_4NQO_IN_WS	33	0.287606	1.08845	0.314961	0.450168	1	1434	tags=24%, list=11%, signal=27%
BIOCARTA_STEM_PATHWAY	15	0.349284	1.08796	0.331719	0.450932	1	387	tags=13%, list=3%, signal=14%
LEE_LIVER_CANCER_E2F1_DN	57	0.259078	1.08764	0.273438	0.451283	1	1088	tags=18%, list=8%, signal=19%
CHNG_MULTIPLE_MYELOMA_HYPERPLOID_UP	44	0.273339	1.08746	0.299233	0.451391	1	3467	tags=41%, list=26%, signal=55%
BROWNE_HCMV_INFECTION_10HR_UP	94	0.233972	1.08734	0.249267	0.451316	1	2890	tags=31%, list=22%, signal=39%
ZWANG_EGF_INTERVAL_DN	132	0.217819	1.08731	0.227692	0.451082	1	1665	tags=19%, list=12%, signal=21%
BURTON_ADIPOGENESIS_PEAK_AT_24HR	31	0.296201	1.08676	0.309973	0.451949	1	3974	tags=45%, list=30%, signal=64%
LEE_CALORIE_RESTRICTION_NEOCORTEX_UP	74	0.240508	1.0863	0.258721	0.452668	1	2135	tags=26%, list=16%, signal=30%
HU_ANGIOGENESIS_UP	20	0.328806	1.08526	0.354523	0.454615	1	1926	tags=30%, list=14%, signal=35%
BIOCARTA_MEF2D_PATHWAY	16	0.351378	1.08512	0.359903	0.45463	1	3375	tags=50%, list=25%, signal=67%
REACTOME_ARMS_MEDIATED_ACTIVATION	15	0.369634	1.08504	0.357477	0.454515	1	1017	tags=20%, list=8%, signal=22%
JIANG_AGING_HYPOTHALAMUS_UP	44	0.273754	1.08445	0.307042	0.455484	1	3409	tags=36%, list=26%, signal=49%
IWANAGA_E2F1_TARGETS_INDUCED_BY_SERUM	19	0.331691	1.08438	0.34321	0.455318	1	2215	tags=26%, list=17%, signal=32%
REACTOME_RNA_POL_I_TRANSCRIPTION_INITIATION	20	0.328349	1.08428	0.313225	0.455238	1	4076	tags=50%, list=31%, signal=72%
MCLACHLAN_DENTAL_CARIES_DN	78	0.237987	1.08404	0.302941	0.455484	1	2991	tags=35%, list=22%, signal=44%
NIKOLSKY_OVERCONNECTED_IN_BREAST_CANCER	18	0.338174	1.0839	0.344473	0.455504	1	2217	tags=33%, list=17%, signal=40%
CHIARETTI_T_ALL_REFRACTORY_TO_THERAPY	28	0.307002	1.08384	0.31941	0.455343	1	1395	tags=18%, list=10%, signal=20%
ROVERSI_GLIOMA_COPY_NUMBER_UP	78	0.240792	1.0832	0.270186	0.456442	1	2608	tags=26%, list=20%, signal=32%
MOLENAAR_TARGETS_OF_CCND1_AND_CDK4_DN	35	0.281603	1.08306	0.338753	0.456447	1	3117	tags=23%, list=23%, signal=30%
REACTOME_CDT1_ASSOCIATION_WITH_THE_CDC6_ORC_ORIGIN_COMPLEX	45	0.26233	1.08298	0.311111	0.456334	1	1728	tags=20%, list=13%, signal=23%
NAKAYAMA_SOFT_TISSUE_TUMORS_PCA2_UP	82	0.240958	1.08295	0.286567	0.456117	1	2469	tags=27%, list=19%, signal=33%
RIZKI_TUMOR_INVASIVENESS_3D_UP	188	0.20475	1.08253	0.225694	0.456698	1	1720	tags=18%, list=13%, signal=20%
REACTOME_ANTIGEN_ACTIVATES_B_CELL_RECEPTOR_LEADING_TO_GENERATION_OF_SECOND_MESSENGERS	26	0.30213	1.08214	0.334928	0.457306	1	1917	tags=31%, list=14%, signal=36%
SCHAEFFER_SOX9_TARGETS_IN_PROSTATE_DEVELOPMENT_DN	36	0.277436	1.08171	0.329238	0.458061	1	2617	tags=28%, list=20%, signal=34%
REACTOME_NOD1_2_SIGNALING_PATHWAY	23	0.311708	1.08107	0.344743	0.459184	1	2237	tags=35%, list=17%, signal=42%
LUI_THYROID_CANCER_CLUSTER_2	37	0.279041	1.08026	0.325758	0.460678	1	1801	tags=27%, list=14%, signal=31%
KATSANOU_ELAVL1_TARGETS_DN	104	0.227664	1.07989	0.308176	0.461203	1	2005	tags=19%, list=15%, signal=22%
HOFFMANN_LARGE_TO_SMALL_PRE_BII_LYMPHOCYTE_UP	138	0.216594	1.07952	0.280936	0.461736	1	4020	tags=38%, list=30%, signal=54%
TOMIDA_METASTASIS_UP	17	0.349975	1.07934	0.365672	0.461832	1	2382	tags=35%, list=18%, signal=43%
LI_PROSTATE_CANCER_EPIGENETIC	28	0.29907	1.07907	0.335897	0.462154	1	1646	tags=29%, list=12%, signal=33%
MODY_HIPPOCAMPUS_PRENATAL	36	0.278563	1.07899	0.300771	0.462024	1	4548	tags=58%, list=34%, signal=88%
WEST_ADRENOCORTICAL_TUMOR_DN	484	0.184902	1.07889	0.178571	0.461932	1	2762	tags=24%, list=21%, signal=30%
JOSEPH_RESPONSE_TO_SODIUM_BUTYRATE_DN	56	0.247246	1.07859	0.328084	0.462292	1	2243	tags=29%, list=17%, signal=34%
BIOCARTA_TOLL_PATHWAY	31	0.300643	1.07858	0.338583	0.461992	1	2355	tags=32%, list=18%, signal=39%
PLASARI_TGFB1_SIGNALING_VIA_NFIC_10HR_UP	36	0.285964	1.07811	0.311005	0.462721	1	3892	tags=50%, list=29%, signal=70%
THEODOROU_MAMMARY_TUMORIGENESIS	22	0.32133	1.07809	0.330846	0.462454	1	904	tags=18%, list=7%, signal=19%
REACTOME_CROSS_PRESENTATION_OF_SOLUBLE_EXOGENOUS_ANTIGENS_ENDOSOMES	43	0.269662	1.07788	0.316489	0.462655	1	1728	tags=21%, list=13%, signal=24%
NIELSEN_GIST_VS_SYNOVIAL_SARCOMA_DN	16	0.345195	1.07733	0.369412	0.463529	1	1634	tags=31%, list=12%, signal=36%
SMID_BREAST_CANCER_RELAPSE_IN_PLEURA_DN	23	0.31387	1.07667	0.345708	0.464702	1	1760	tags=26%, list=13%, signal=30%
REACTOME_RNA_POL_I_TRANSCRIPTION_TERMINATION	18	0.33779	1.07666	0.346734	0.464412	1	4855	tags=67%, list=36%, signal=105%
SHEPARD_CRUSH_AND_BURN_MUTANT_DN	140	0.21525	1.07637	0.302405	0.464757	1	3956	tags=41%, list=30%, signal=57%
BONOME_OVARIAN_CANCER_SURVIVAL_OPTIMAL_DEBULKING	204	0.203295	1.07567	0.24735	0.466028	1	2933	tags=29%, list=22%, signal=37%
BOYAULT_LIVER_CANCER_SUBCLASS_G23_UP	45	0.265475	1.07488	0.322314	0.46748	1	2833	tags=24%, list=21%, signal=31%
PID_CD8_TCR_PATHWAY	48	0.257669	1.07457	0.319328	0.467821	1	2197	tags=27%, list=16%, signal=32%
PID_IL12_2PATHWAY	55	0.253726	1.07426	0.282609	0.468199	1	2603	tags=31%, list=20%, signal=38%
CHIANG_LIVER_CANCER_SUBCLASS_UNANNOTATED_DN	140	0.214038	1.07401	0.277955	0.468438	1	3723	tags=38%, list=28%, signal=52%
CONCANNON_APOPTOSIS_BY_EPOXOMICIN_DN	146	0.210488	1.07331	0.28	0.469695	1	2298	tags=23%, list=17%, signal=27%
BIOCARTA_CCR5_PATHWAY	15	0.358523	1.07324	0.353222	0.469571	1	1557	tags=27%, list=12%, signal=30%
HANN_RESISTANCE_TO_BCL2_INHIBITOR_UP	28	0.303413	1.0729	0.344059	0.470051	1	320	tags=14%, list=2%, signal=15%
MCBRYAN_PUBERTAL_BREAST_5_6WK_UP	86	0.234919	1.07269	0.285714	0.470249	1	1572	tags=21%, list=12%, signal=24%
FIGUEROA_AML_METHYLATION_CLUSTER_6_DN	20	0.326857	1.07131	0.348235	0.473076	1	2257	tags=30%, list=17%, signal=36%
MOREAUX_B_LYMPHOCYTE_MATURATION_BY_TACI_DN	45	0.266062	1.07117	0.3486	0.473091	1	3478	tags=38%, list=26%, signal=51%
BIOCARTA_VEGF_PATHWAY	27	0.298257	1.07083	0.355072	0.473581	1	1430	tags=22%, list=11%, signal=25%
REACTOME_SEMA4D_INDUCED_CELL_MIGRATION_AND_GROWTH_CONE_COLLAPSE	23	0.305971	1.07035	0.350133	0.474336	1	3892	tags=48%, list=29%, signal=67%
CERVERA_SDHB_TARGETS_1_DN	29	0.301724	1.06991	0.315385	0.475007	1	1795	tags=24%, list=13%, signal=28%
RHODES_UNDIFFERENTIATED_CANCER	63	0.248653	1.06963	0.322981	0.475327	1	4020	tags=44%, list=30%, signal=63%
YAGI_AML_WITH_T_8_21_TRANSLOCATION	327	0.188192	1.0688	0.235577	0.476972	1	2256	tags=22%, list=17%, signal=26%
HUANG_GATA2_TARGETS_UP	118	0.221267	1.06824	0.253247	0.477907	1	2425	tags=24%, list=18%, signal=29%
RUTELLA_RESPONSE_TO_HGF_DN	205	0.202352	1.06795	0.252747	0.47826	1	2631	tags=25%, list=20%, signal=31%
TORCHIA_TARGETS_OF_EWSR1_FLI1_FUSION_TOP20_DN	17	0.336249	1.06735	0.353774	0.479362	1	1278	tags=29%, list=10%, signal=32%
BRUNO_HEMATOPOIESIS	60	0.253037	1.06734	0.345109	0.479097	1	4005	tags=43%, list=30%, signal=62%
BROWNE_HCMV_INFECTION_14HR_UP	135	0.20979	1.0667	0.277946	0.480207	1	2481	tags=24%, list=19%, signal=29%
KIM_WT1_TARGETS_8HR_DN	118	0.220471	1.0661	0.252459	0.481179	1	2258	tags=24%, list=17%, signal=28%
PID_SYNDECAN_2_PATHWAY	32	0.286425	1.06597	0.348285	0.481192	1	2219	tags=31%, list=17%, signal=37%
REACTOME_DNA_REPAIR	92	0.229292	1.06594	0.305556	0.48096	1	2136	tags=21%, list=16%, signal=24%
KAAB_HEART_ATRIUM_VS_VENTRICLE_UP	223	0.197024	1.06537	0.282946	0.481968	1	2425	tags=24%, list=18%, signal=29%
SHIN_B_CELL_LYMPHOMA_CLUSTER_3	25	0.304651	1.06514	0.350588	0.482144	1	2664	tags=28%, list=20%, signal=35%
DELACROIX_RAR_TARGETS_UP	42	0.262784	1.06452	0.324742	0.48337	1	2162	tags=26%, list=16%, signal=31%
MARCHINI_TRABECTEDIN_RESISTANCE_UP	21	0.319865	1.06356	0.346535	0.485274	1	2987	tags=38%, list=22%, signal=49%
MCCLUNG_CREB1_TARGETS_UP	82	0.232419	1.06349	0.319648	0.485123	1	1380	tags=17%, list=10%, signal=19%
TAKEDA_TARGETS_OF_NUP98_HOXA9_FUSION_16D_DN	99	0.223138	1.06255	0.284457	0.48697	1	2293	tags=21%, list=17%, signal=25%
LEIN_PONS_MARKERS	67	0.243274	1.06196	0.344729	0.488026	1	1501	tags=16%, list=11%, signal=18%
MOHANKUMAR_TLX1_TARGETS_UP	334	0.189833	1.06139	0.252252	0.489024	1	2523	tags=23%, list=19%, signal=28%
CHYLA_CBFA2T3_TARGETS_UP	274	0.191474	1.06107	0.248945	0.489476	1	2056	tags=21%, list=15%, signal=24%
REACTOME_DOWNSTREAM_TCR_SIGNALING	29	0.293774	1.06079	0.344221	0.489746	1	2499	tags=34%, list=19%, signal=42%
STAMBOLSKY_RESPONSE_TO_VITAMIN_D3_DN	17	0.338373	1.06055	0.334129	0.490038	1	2083	tags=29%, list=16%, signal=35%
JOHNSTONE_PARVB_TARGETS_2_UP	117	0.219163	1.06039	0.279412	0.490115	1	2307	tags=24%, list=17%, signal=29%
WANG_NEOPLASTIC_TRANSFORMATION_BY_CCND1_MYC	18	0.328693	1.05954	0.369668	0.491699	1	126	tags=11%, list=1%, signal=11%
HAHTOLA_MYCOSIS_FUNGOIDES_SKIN_DN	27	0.293397	1.05929	0.370546	0.491975	1	1254	tags=22%, list=9%, signal=24%
LEE_LIVER_CANCER_MYC_DN	56	0.24853	1.05891	0.34626	0.492521	1	2354	tags=25%, list=18%, signal=30%
IVANOVA_HEMATOPOIESIS_LATE_PROGENITOR	350	0.187066	1.05889	0.266055	0.492254	1	2491	tags=21%, list=19%, signal=26%
WANG_ESOPHAGUS_CANCER_VS_NORMAL_DN	89	0.22728	1.05877	0.326816	0.492219	1	1186	tags=17%, list=9%, signal=18%
LINDGREN_BLADDER_CANCER_CLUSTER_3_UP	249	0.193171	1.05816	0.289157	0.493253	1	3369	tags=29%, list=25%, signal=39%
CHEMNITZ_RESPONSE_TO_PROSTAGLANDIN_E2_DN	235	0.195154	1.05794	0.279835	0.49347	1	2342	tags=22%, list=18%, signal=26%
HELLER_HDAC_TARGETS_DN	251	0.194413	1.05726	0.298246	0.494775	1	3457	tags=32%, list=26%, signal=43%
HOWLIN_PUBERTAL_MAMMARY_GLAND	61	0.247772	1.05703	0.340491	0.49505	1	2810	tags=34%, list=21%, signal=43%
BERENJENO_ROCK_SIGNALING_NOT_VIA_RHOA_UP	26	0.30126	1.05697	0.37037	0.494853	1	3323	tags=38%, list=25%, signal=51%
SMIRNOV_RESPONSE_TO_IR_6HR_DN	102	0.219118	1.05653	0.317901	0.495499	1	2664	tags=25%, list=20%, signal=30%
VERHAAK_GLIOBLASTOMA_CLASSICAL	149	0.208705	1.05615	0.316498	0.496073	1	3099	tags=30%, list=23%, signal=39%
BURTON_ADIPOGENESIS_PEAK_AT_0HR	56	0.250067	1.05593	0.347709	0.496236	1	2233	tags=25%, list=17%, signal=30%
FONTAINE_THYROID_TUMOR_UNCERTAIN_MALIGNANCY_UP	27	0.291554	1.05508	0.359897	0.497877	1	1649	tags=26%, list=12%, signal=30%
BILD_E2F3_ONCOGENIC_SIGNATURE	164	0.20614	1.05489	0.315113	0.498002	1	1940	tags=18%, list=15%, signal=20%
DAVICIONI_MOLECULAR_ARMS_VS_ERMS_UP	281	0.189085	1.05462	0.282158	0.49831	1	1790	tags=19%, list=13%, signal=22%
HILLION_HMGA1B_TARGETS	85	0.23201	1.05429	0.346269	0.498813	1	1811	tags=20%, list=14%, signal=23%
CHEMNITZ_RESPONSE_TO_PROSTAGLANDIN_E2_UP	105	0.218561	1.05406	0.319527	0.499047	1	2437	tags=22%, list=18%, signal=27%
KEGG_PROTEASOME	41	0.265614	1.05387	0.37037	0.499165	1	1728	tags=22%, list=13%, signal=25%
MULLIGHAN_NPM1_MUTATED_SIGNATURE_2_UP	116	0.215633	1.05377	0.318493	0.499074	1	1866	tags=19%, list=14%, signal=22%
SHAFFER_IRF4_TARGETS_IN_ACTIVATED_B_LYMPHOCYTE	72	0.234652	1.05334	0.358209	0.499793	1	1328	tags=15%, list=10%, signal=17%
BOUDOUKHA_BOUND_BY_IGF2BP2	88	0.230851	1.05323	0.343465	0.499715	1	2040	tags=23%, list=15%, signal=27%
ACEVEDO_LIVER_TUMOR_VS_NORMAL_ADJACENT_TISSUE_DN	208	0.195242	1.0529	0.290566	0.50018	1	802	tags=11%, list=6%, signal=11%
REACTOME_PEPTIDE_LIGAND_BINDING_RECEPTORS	145	0.210736	1.05186	0.324921	0.502212	1	3211	tags=30%, list=24%, signal=39%
BIOCARTA_ATRBRCA_PATHWAY	20	0.322704	1.05178	0.383085	0.502112	1	1921	tags=30%, list=14%, signal=35%
REACTOME_G1_S_TRANSITION	93	0.223767	1.0516	0.372781	0.502227	1	3504	tags=33%, list=26%, signal=45%
TAKEDA_TARGETS_OF_NUP98_HOXA9_FUSION_10D_DN	114	0.216034	1.05122	0.303951	0.502856	1	1763	tags=17%, list=13%, signal=19%
CHENG_RESPONSE_TO_NICKEL_ACETATE	36	0.27072	1.05106	0.374046	0.502879	1	3452	tags=39%, list=26%, signal=52%
CADWELL_ATG16L1_TARGETS_DN	45	0.25838	1.05103	0.359673	0.50261	1	2703	tags=31%, list=20%, signal=39%
SERVITJA_LIVER_HNF1A_TARGETS_UP	107	0.215906	1.05053	0.347107	0.503451	1	3188	tags=35%, list=24%, signal=45%
SIG_CHEMOTAXIS	43	0.266814	1.05016	0.382812	0.503993	1	1486	tags=19%, list=11%, signal=21%
KAMIKUBO_MYELOID_MN1_NETWORK	16	0.347297	1.0501	0.365155	0.503831	1	673	tags=19%, list=5%, signal=20%
HERNANDEZ_ABERRANT_MITOSIS_BY_DOCETACEL_2NM_UP	68	0.234476	1.04942	0.365497	0.505104	1	3106	tags=35%, list=23%, signal=46%
LINDGREN_BLADDER_CANCER_CLUSTER_3_DN	172	0.201216	1.0492	0.32459	0.505319	1	1971	tags=19%, list=15%, signal=22%
PID_SHP2_PATHWAY	53	0.246753	1.04909	0.354839	0.505247	1	2449	tags=26%, list=18%, signal=32%
SHIPP_DLBCL_CURED_VS_FATAL_UP	36	0.27324	1.04872	0.384615	0.505787	1	971	tags=19%, list=7%, signal=21%
ZHAN_MULTIPLE_MYELOMA_MS_DN	28	0.286749	1.04859	0.371212	0.505747	1	2878	tags=39%, list=22%, signal=50%
WATTEL_AUTONOMOUS_THYROID_ADENOMA_DN	48	0.255042	1.04834	0.367021	0.505993	1	2921	tags=31%, list=22%, signal=40%
TARTE_PLASMA_CELL_VS_B_LYMPHOCYTE_UP	72	0.233877	1.04822	0.362857	0.505985	1	2382	tags=25%, list=18%, signal=30%
TONKS_TARGETS_OF_RUNX1_RUNX1T1_FUSION_MONOCYTE_DN	50	0.247978	1.04732	0.366848	0.507732	1	2604	tags=32%, list=20%, signal=40%
LI_WILMS_TUMOR_VS_FETAL_KIDNEY_1_DN	149	0.203901	1.04595	0.349835	0.510723	1	3294	tags=30%, list=25%, signal=39%
SHETH_LIVER_CANCER_VS_TXNIP_LOSS_PAM6	33	0.277864	1.04562	0.350543	0.511165	1	2535	tags=33%, list=19%, signal=41%
PID_RET_PATHWAY	36	0.278003	1.04496	0.354839	0.512399	1	1388	tags=19%, list=10%, signal=22%
GOLDRATH_IMMUNE_MEMORY	52	0.251866	1.04374	0.394886	0.51505	1	2184	tags=27%, list=16%, signal=32%
WIERENGA_STAT5A_TARGETS_GROUP1	90	0.222772	1.0426	0.35625	0.517507	1	2505	tags=24%, list=19%, signal=30%
SENESE_HDAC3_TARGETS_DN	337	0.183737	1.04173	0.322275	0.519301	1	2311	tags=22%, list=17%, signal=26%
CAIRO_HEPATOBLASTOMA_CLASSES_DN	187	0.196752	1.04166	0.327586	0.519147	1	2197	tags=22%, list=16%, signal=27%
REACTOME_INSULIN_SYNTHESIS_AND_PROCESSING	17	0.326453	1.04155	0.381944	0.519065	1	647	tags=18%, list=5%, signal=19%
REACTOME_ACTIVATION_OF_THE_MRNA_UPON_BINDING_OF_THE_CAP_BINDING_COMPLEX_AND_EIFS_AND_SUBSEQUENT_BINDING_TO_43S	42	0.260735	1.04128	0.392473	0.51936	1	3429	tags=29%, list=26%, signal=38%
REACTOME_UNFOLDED_PROTEIN_RESPONSE	70	0.233122	1.04107	0.373984	0.519506	1	1851	tags=17%, list=14%, signal=20%
VALK_AML_CLUSTER_2	26	0.292216	1.04096	0.380247	0.519433	1	1202	tags=15%, list=9%, signal=17%
LEE_AGING_CEREBELLUM_UP	73	0.231415	1.04083	0.375	0.519424	1	2197	tags=22%, list=16%, signal=26%
REACTOME_EFFECTS_OF_PIP2_HYDROLYSIS	19	0.313771	1.03946	0.390863	0.522385	1	2027	tags=21%, list=15%, signal=25%
TAYLOR_METHYLATED_IN_ACUTE_LYMPHOBLASTIC_LEUKEMIA	51	0.248856	1.03944	0.351351	0.522123	1	2893	tags=31%, list=22%, signal=40%
PID_EPHB_FWD_PATHWAY	39	0.263569	1.0391	0.41519	0.522637	1	1388	tags=18%, list=10%, signal=20%
KAAB_FAILED_HEART_ATRIUM_DN	128	0.2075	1.03881	0.372549	0.522977	1	2167	tags=23%, list=16%, signal=27%
ZWANG_EGF_PERSISTENTLY_UP	20	0.316664	1.03861	0.424757	0.523147	1	1799	tags=35%, list=14%, signal=40%
PID_NECTIN_PATHWAY	29	0.292556	1.03807	0.407104	0.524117	1	1388	tags=21%, list=10%, signal=23%
PID_IL8_CXCR1_PATHWAY	24	0.303301	1.03767	0.38718	0.524807	1	1601	tags=29%, list=12%, signal=33%
COLIN_PILOCYTIC_ASTROCYTOMA_VS_GLIOBLASTOMA_UP	31	0.274889	1.03652	0.374707	0.527381	1	2094	tags=29%, list=16%, signal=34%
VANDESLUIS_COMMD1_TARGETS_GROUP_3_DN	27	0.294363	1.03562	0.393939	0.529305	1	2901	tags=41%, list=22%, signal=52%
KEGG_GLYCOSAMINOGLYCAN_BIOSYNTHESIS_HEPARAN_SULFATE	20	0.31749	1.03488	0.387471	0.53075	1	2583	tags=35%, list=19%, signal=43%
RIZ_ERYTHROID_DIFFERENTIATION_HEMGN	27	0.296494	1.0344	0.379135	0.531583	1	846	tags=15%, list=6%, signal=16%
GOTZMANN_EPITHELIAL_TO_MESENCHYMAL_TRANSITION_DN	192	0.193457	1.03433	0.352518	0.531444	1	2108	tags=19%, list=16%, signal=23%
REACTOME_NONSENSE_MEDIATED_DECAY_ENHANCED_BY_THE_EXON_JUNCTION_COMPLEX	95	0.2224	1.03295	0.369565	0.534471	1	3495	tags=36%, list=26%, signal=48%
BILD_MYC_ONCOGENIC_SIGNATURE	137	0.206604	1.0326	0.390476	0.534972	1	1839	tags=18%, list=14%, signal=21%
MONNIER_POSTRADIATION_TUMOR_ESCAPE_UP	282	0.185502	1.03237	0.378261	0.535212	1	2101	tags=19%, list=16%, signal=22%
HASLINGER_B_CLL_WITH_MUTATED_VH_GENES	17	0.328925	1.03138	0.404706	0.53728	1	2160	tags=35%, list=16%, signal=42%
KIM_MYC_AMPLIFICATION_TARGETS_UP	140	0.204554	1.03103	0.37224	0.537781	1	2092	tags=24%, list=16%, signal=28%
REACTOME_P53_DEPENDENT_G1_DNA_DAMAGE_RESPONSE	50	0.249008	1.03097	0.389205	0.537603	1	2806	tags=30%, list=21%, signal=38%
MARTORIATI_MDM4_TARGETS_FETAL_LIVER_UP	143	0.206187	1.03078	0.369775	0.537743	1	2052	tags=22%, list=15%, signal=25%
PELLICCIOTTA_HDAC_IN_ANTIGEN_PRESENTATION_UP	53	0.247623	1.03062	0.414894	0.537804	1	2716	tags=30%, list=20%, signal=38%
OSMAN_BLADDER_CANCER_DN	270	0.188115	1.03037	0.350427	0.538091	1	3467	tags=33%, list=26%, signal=43%
BONOME_OVARIAN_CANCER_SURVIVAL_SUBOPTIMAL_DEBULKING	440	0.177844	1.03019	0.358974	0.538247	1	2737	tags=24%, list=21%, signal=29%
DOANE_RESPONSE_TO_ANDROGEN_DN	213	0.193988	1.03017	0.365942	0.537959	1	1840	tags=18%, list=14%, signal=20%
NIKOLSKY_BREAST_CANCER_8Q12_Q22_AMPLICON	86	0.22442	1.02988	0.411215	0.5383	1	2302	tags=21%, list=17%, signal=25%
CREIGHTON_ENDOCRINE_THERAPY_RESISTANCE_2	200	0.193682	1.02936	0.363971	0.53921	1	2652	tags=25%, list=20%, signal=30%
TSENG_IRS1_TARGETS_UP	92	0.216946	1.02918	0.378882	0.539312	1	1994	tags=25%, list=15%, signal=29%
CHEOK_RESPONSE_TO_MERCAPTOPURINE_AND_LD_MTX_DN	15	0.335908	1.02852	0.413146	0.540552	1	2374	tags=40%, list=18%, signal=49%
XU_GH1_EXOGENOUS_TARGETS_DN	89	0.218494	1.0275	0.401216	0.542657	1	3083	tags=31%, list=23%, signal=41%
MIKKELSEN_ES_ICP_WITH_H3K4ME3_AND_H3K27ME3	82	0.226674	1.02748	0.389222	0.542381	1	1794	tags=24%, list=13%, signal=28%
REACTOME_TRAF6_MEDIATED_IRF7_ACTIVATION	27	0.288588	1.02695	0.410377	0.543366	1	1096	tags=19%, list=8%, signal=20%
REACTOME_TIE2_SIGNALING	17	0.325211	1.0269	0.4175	0.543144	1	1980	tags=29%, list=15%, signal=35%
ICHIBA_GRAFT_VERSUS_HOST_DISEASE_35D_DN	41	0.257867	1.02659	0.384817	0.543574	1	876	tags=17%, list=7%, signal=18%
SARTIPY_NORMAL_AT_INSULIN_RESISTANCE_DN	15	0.333053	1.02626	0.383863	0.544029	1	2184	tags=27%, list=16%, signal=32%
AZARE_NEOPLASTIC_TRANSFORMATION_BY_STAT3_DN	15	0.337897	1.02577	0.418491	0.544827	1	1702	tags=33%, list=13%, signal=38%
PUJANA_BREAST_CANCER_LIT_INT_NETWORK	94	0.217091	1.0257	0.396601	0.544659	1	3972	tags=39%, list=30%, signal=56%
VART_KSHV_INFECTION_ANGIOGENIC_MARKERS_DN	120	0.207494	1.02567	0.405797	0.544414	1	1721	tags=19%, list=13%, signal=22%
HASLINGER_B_CLL_WITH_13Q14_DELETION	19	0.319421	1.02524	0.400491	0.545082	1	1334	tags=26%, list=10%, signal=29%
PILON_KLF1_TARGETS_UP	378	0.178193	1.0248	0.361111	0.545835	1	2691	tags=23%, list=20%, signal=28%
FERRANDO_T_ALL_WITH_MLL_ENL_FUSION_UP	79	0.228479	1.02335	0.391691	0.549009	1	1917	tags=22%, list=14%, signal=25%
SEMENZA_HIF1_TARGETS	33	0.272931	1.02285	0.404092	0.549933	1	2366	tags=27%, list=18%, signal=33%
SMID_BREAST_CANCER_RELAPSE_IN_BRAIN_UP	38	0.260335	1.02272	0.425474	0.549925	1	509	tags=13%, list=4%, signal=14%
MCDOWELL_ACUTE_LUNG_INJURY_DN	43	0.257676	1.02247	0.430481	0.550156	1	2229	tags=26%, list=17%, signal=31%
NEMETH_INFLAMMATORY_RESPONSE_LPS_DN	30	0.279291	1.02223	0.416667	0.550452	1	2879	tags=33%, list=22%, signal=42%
MILI_PSEUDOPODIA_CHEMOTAXIS_UP	44	0.258901	1.02222	0.4	0.550151	1	3119	tags=32%, list=23%, signal=41%
OUELLET_CULTURED_OVARIAN_CANCER_INVASIVE_VS_LMP_UP	63	0.23567	1.02207	0.398329	0.550152	1	3292	tags=35%, list=25%, signal=46%
LABBE_WNT3A_TARGETS_DN	79	0.224094	1.02097	0.417582	0.552615	1	469	tags=10%, list=4%, signal=10%
KEGG_CYTOSOLIC_DNA_SENSING_PATHWAY	47	0.24534	1.02074	0.441341	0.552896	1	1199	tags=17%, list=9%, signal=19%
KUROKAWA_LIVER_CANCER_CHEMOTHERAPY_DN	36	0.263137	1.01914	0.433566	0.556439	1	2240	tags=28%, list=17%, signal=33%
MULLIGHAN_MLL_SIGNATURE_1_DN	211	0.190499	1.01906	0.383513	0.556284	1	1960	tags=19%, list=15%, signal=22%
REN_BOUND_BY_E2F	55	0.239629	1.01854	0.446377	0.557252	1	4020	tags=42%, list=30%, signal=60%
TERAO_AOX4_TARGETS_SKIN_UP	30	0.285481	1.01833	0.434896	0.557462	1	1008	tags=20%, list=8%, signal=22%
VALK_AML_CLUSTER_10	31	0.27608	1.01772	0.448718	0.55861	1	1785	tags=26%, list=13%, signal=30%
BHAT_ESR1_TARGETS_NOT_VIA_AKT1_DN	67	0.23577	1.01729	0.433803	0.559319	1	2558	tags=27%, list=19%, signal=33%
REACTOME_MEIOTIC_SYNAPSIS	56	0.238477	1.017	0.433766	0.559705	1	2668	tags=27%, list=20%, signal=33%
PELLICCIOTTA_HDAC_IN_ANTIGEN_PRESENTATION_DN	45	0.251663	1.01697	0.409326	0.559453	1	1728	tags=18%, list=13%, signal=20%
HE_PTEN_TARGETS_UP	16	0.328716	1.01657	0.418886	0.560096	1	2195	tags=31%, list=16%, signal=37%
DELYS_THYROID_CANCER_DN	212	0.192151	1.01608	0.397213	0.561029	1	1819	tags=17%, list=14%, signal=19%
MISSIAGLIA_REGULATED_BY_METHYLATION_DN	104	0.211871	1.0156	0.455882	0.561868	1	3234	tags=29%, list=24%, signal=38%
PASINI_SUZ12_TARGETS_UP	77	0.220818	1.01551	0.393846	0.561738	1	2096	tags=23%, list=16%, signal=28%
PID_INTEGRIN2_PATHWAY	27	0.287861	1.01512	0.424802	0.562396	1	1389	tags=19%, list=10%, signal=21%
SCHWAB_TARGETS_OF_BMYB_POLYMORPHIC_VARIANTS_DN	15	0.339977	1.01505	0.43128	0.562234	1	1485	tags=27%, list=11%, signal=30%
REACTOME_ASPARAGINE_N_LINKED_GLYCOSYLATION	63	0.230765	1.01377	0.449198	0.565043	1	1911	tags=22%, list=14%, signal=26%
SCHAEFFER_PROSTATE_DEVELOPMENT_48HR_DN	291	0.181953	1.01358	0.409836	0.565173	1	1737	tags=16%, list=13%, signal=18%
CHEOK_RESPONSE_TO_HD_MTX_UP	20	0.306362	1.01346	0.451282	0.565138	1	2348	tags=30%, list=18%, signal=36%
PID_ILK_PATHWAY	40	0.261297	1.01259	0.432361	0.566939	1	2233	tags=30%, list=17%, signal=36%
ROSTY_CERVICAL_CANCER_PROLIFERATION_CLUSTER	124	0.204891	1.01121	0.400673	0.570027	1	3117	tags=29%, list=23%, signal=38%
ABBUD_LIF_SIGNALING_1_UP	42	0.251024	1.01102	0.450928	0.570137	1	2279	tags=29%, list=17%, signal=34%
KAPOSI_LIVER_CANCER_MET_UP	16	0.324001	1.01049	0.439636	0.571079	1	884	tags=25%, list=7%, signal=27%
SETLUR_PROSTATE_CANCER_TMPRSS2_ERG_FUSION_UP	60	0.235877	1.01005	0.418398	0.57185	1	1265	tags=15%, list=9%, signal=16%
NAKAMURA_METASTASIS_MODEL_DN	30	0.27239	1.00997	0.443878	0.571712	1	1963	tags=23%, list=15%, signal=27%
XU_GH1_AUTOCRINE_TARGETS_DN	108	0.21181	1.00972	0.416918	0.571969	1	2367	tags=24%, list=18%, signal=29%
TARTE_PLASMA_CELL_VS_PLASMABLAST_DN	271	0.185118	1.00968	0.422594	0.571742	1	3300	tags=32%, list=25%, signal=42%
HELLER_HDAC_TARGETS_SILENCED_BY_METHYLATION_DN	244	0.184851	1.00915	0.447368	0.57272	1	3457	tags=33%, list=26%, signal=43%
RHODES_CANCER_META_SIGNATURE	54	0.235608	1.00857	0.457627	0.57386	1	2063	tags=22%, list=15%, signal=26%
BILANGES_RAPAMYCIN_SENSITIVE_GENES	31	0.269192	1.00831	0.446512	0.574136	1	3874	tags=48%, list=29%, signal=68%
REACTOME_DOWNSTREAM_SIGNALING_EVENTS_OF_B_CELL_RECEPTOR_BCR	78	0.224438	1.00798	0.391931	0.574608	1	2003	tags=21%, list=15%, signal=24%
NABA_COLLAGENS	33	0.271956	1.00793	0.43401	0.57441	1	1783	tags=24%, list=13%, signal=28%
BOYAULT_LIVER_CANCER_SUBCLASS_G2	25	0.283863	1.00729	0.466334	0.575728	1	932	tags=16%, list=7%, signal=17%
HOFMANN_CELL_LYMPHOMA_DN	39	0.260049	1.00617	0.475806	0.578232	1	1217	tags=21%, list=9%, signal=23%
PENG_GLUTAMINE_DEPRIVATION_DN	281	0.183153	1.00552	0.45614	0.579505	1	3048	tags=27%, list=23%, signal=34%
REACTOME_PERK_REGULATED_GENE_EXPRESSION	24	0.291037	1.00462	0.452153	0.581412	1	2585	tags=33%, list=19%, signal=41%
BERNARD_PPAPDC1B_TARGETS_UP	29	0.272356	1.0042	0.419118	0.582167	1	2053	tags=28%, list=15%, signal=33%
PID_CERAMIDE_PATHWAY	46	0.249611	1.0041	0.433511	0.582054	1	944	tags=13%, list=7%, signal=14%
DEMAGALHAES_AGING_UP	43	0.250872	1.00342	0.430348	0.583419	1	2197	tags=19%, list=16%, signal=22%
BIOCARTA_CASPASE_PATHWAY	22	0.29811	1.0021	0.444965	0.586406	1	3564	tags=36%, list=27%, signal=50%
REACTOME_INNATE_IMMUNE_SYSTEM	197	0.188817	1.00194	0.472222	0.586437	1	2089	tags=20%, list=16%, signal=24%
SANSOM_WNT_PATHWAY_REQUIRE_MYC	52	0.245161	1.00153	0.45614	0.587166	1	2107	tags=23%, list=16%, signal=27%
LU_IL4_SIGNALING	75	0.223119	1.0015	0.455587	0.586874	1	2836	tags=29%, list=21%, signal=37%
JAZAG_TGFB1_SIGNALING_UP	97	0.210217	1.00147	0.457317	0.586613	1	2959	tags=27%, list=22%, signal=34%
CADWELL_ATG16L1_TARGETS_UP	65	0.230976	1.00144	0.463343	0.586323	1	1540	tags=22%, list=12%, signal=24%
KIM_GERMINAL_CENTER_T_HELPER_DN	16	0.320276	1.00132	0.441527	0.586275	1	3140	tags=50%, list=24%, signal=65%
TAVOR_CEBPA_TARGETS_DN	29	0.271531	1.00078	0.438849	0.587325	1	1217	tags=21%, list=9%, signal=23%
REACTOME_RECRUITMENT_OF_MITOTIC_CENTROSOME_PROTEINS_AND_COMPLEXES	51	0.239704	1.00047	0.469208	0.587773	1	2194	tags=24%, list=16%, signal=28%
REACTOME_SIGNALING_BY_ERBB2	83	0.219277	0.998546	0.4375	0.592165	1	1950	tags=20%, list=15%, signal=24%
PID_BMP_PATHWAY	34	0.270957	0.998398	0.457831	0.592212	1	2521	tags=29%, list=19%, signal=36%
YAO_TEMPORAL_RESPONSE_TO_PROGESTERONE_CLUSTER_15	31	0.266907	0.997969	0.420792	0.592966	1	1283	tags=16%, list=10%, signal=18%
BIOCARTA_EIF4_PATHWAY	22	0.299765	0.997807	0.469388	0.593043	1	1388	tags=27%, list=10%, signal=30%
PURBEY_TARGETS_OF_CTBP1_NOT_SATB1_DN	344	0.175513	0.997544	0.474178	0.593353	1	2220	tags=20%, list=17%, signal=24%
POS_HISTAMINE_RESPONSE_NETWORK	28	0.277199	0.99739	0.433168	0.593372	1	3428	tags=39%, list=26%, signal=53%
LABBE_TGFB1_TARGETS_DN	96	0.210109	0.995097	0.424437	0.598847	1	2188	tags=22%, list=16%, signal=26%
VANASSE_BCL2_TARGETS_UP	34	0.259313	0.994885	0.481203	0.599007	1	1649	tags=21%, list=12%, signal=23%
SHI_SPARC_TARGETS_UP	18	0.322426	0.994767	0.4775	0.598951	1	1022	tags=17%, list=8%, signal=18%
TAKEDA_TARGETS_OF_NUP98_HOXA9_FUSION_3D_DN	28	0.278191	0.994205	0.457584	0.599992	1	169	tags=11%, list=1%, signal=11%
DOANE_BREAST_CANCER_ESR1_UP	101	0.212708	0.993754	0.444767	0.600783	1	1237	tags=15%, list=9%, signal=16%
ST_MYOCYTE_AD_PATHWAY	26	0.278681	0.993594	0.473684	0.600814	1	593	tags=19%, list=4%, signal=20%
BIOCARTA_GSK3_PATHWAY	26	0.281398	0.993235	0.447917	0.601424	1	2355	tags=35%, list=18%, signal=42%
ZHONG_SECRETOME_OF_LUNG_CANCER_AND_FIBROBLAST	123	0.202233	0.99298	0.485893	0.601713	1	2063	tags=19%, list=15%, signal=22%
MULLIGAN_NTF3_SIGNALING_VIA_INSR_AND_IGF1R_UP	20	0.299708	0.992359	0.450382	0.602914	1	3977	tags=50%, list=30%, signal=71%
GAUSSMANN_MLL_AF4_FUSION_TARGETS_E_DN	16	0.320205	0.991844	0.466184	0.603923	1	711	tags=19%, list=5%, signal=20%
LIN_TUMOR_ESCAPE_FROM_IMMUNE_ATTACK	15	0.32028	0.991572	0.450363	0.604256	1	1754	tags=27%, list=13%, signal=31%
PYEON_HPV_POSITIVE_TUMORS_UP	54	0.233713	0.991507	0.459155	0.604077	1	3860	tags=35%, list=29%, signal=49%
KONDO_PROSTATE_CANCER_HCP_WITH_H3K27ME3	55	0.237987	0.991386	0.474255	0.604035	1	3377	tags=36%, list=25%, signal=49%
LEE_LIVER_CANCER_MYC_TGFA_UP	59	0.227508	0.990599	0.478261	0.605718	1	3192	tags=31%, list=24%, signal=40%
CHANG_IMMORTALIZED_BY_HPV31_UP	55	0.232616	0.989712	0.474093	0.6077	1	2411	tags=25%, list=18%, signal=31%
MULLIGHAN_MLL_SIGNATURE_2_DN	247	0.184964	0.989525	0.505495	0.607832	1	1790	tags=18%, list=13%, signal=20%
MIKKELSEN_MEF_ICP_WITH_H3K4ME3_AND_H3K27ME3	24	0.285743	0.989247	0.4689	0.608259	1	2724	tags=33%, list=20%, signal=42%
WANG_RESPONSE_TO_ANDROGEN_UP	24	0.288536	0.988397	0.460784	0.610109	1	2927	tags=29%, list=22%, signal=37%
FIRESTEIN_PROLIFERATION	133	0.195839	0.988274	0.458333	0.610108	1	2050	tags=22%, list=15%, signal=26%
LI_ADIPOGENESIS_BY_ACTIVATED_PPARG	16	0.321223	0.987262	0.45	0.612403	1	2193	tags=31%, list=16%, signal=37%
KEGG_ASTHMA	27	0.27424	0.986688	0.489071	0.613456	1	2906	tags=33%, list=22%, signal=43%
NING_CHRONIC_OBSTRUCTIVE_PULMONARY_DISEASE_DN	97	0.207057	0.9852	0.501475	0.616836	1	2648	tags=25%, list=20%, signal=31%
ZHENG_FOXP3_TARGETS_UP	20	0.304057	0.985073	0.485437	0.6168	1	2300	tags=30%, list=17%, signal=36%
SIMBULAN_UV_RESPONSE_NORMAL_DN	27	0.279241	0.984874	0.49005	0.616981	1	1913	tags=26%, list=14%, signal=30%
GRESHOCK_CANCER_COPY_NUMBER_UP	293	0.178998	0.984861	0.522388	0.616653	1	2282	tags=20%, list=17%, signal=24%
REACTOME_PURINE_METABOLISM	27	0.274171	0.984469	0.480519	0.617305	1	2846	tags=26%, list=21%, signal=33%
BIOCARTA_MYOSIN_PATHWAY	29	0.263172	0.984154	0.492462	0.617724	1	2344	tags=24%, list=18%, signal=29%
MCCABE_BOUND_BY_HOXC6	242	0.181855	0.984014	0.47619	0.61771	1	2465	tags=22%, list=19%, signal=27%
PID_FCER1_PATHWAY	57	0.228192	0.983805	0.482249	0.617888	1	2760	tags=32%, list=21%, signal=40%
ACEVEDO_NORMAL_TISSUE_ADJACENT_TO_LIVER_TUMOR_UP	131	0.197322	0.983609	0.491103	0.618043	1	2779	tags=25%, list=21%, signal=32%
CAFFAREL_RESPONSE_TO_THC_24HR_5_DN	45	0.239552	0.983575	0.465909	0.617768	1	1288	tags=16%, list=10%, signal=17%
REACTOME_ORC1_REMOVAL_FROM_CHROMATIN	56	0.228523	0.98209	0.491713	0.621208	1	1728	tags=18%, list=13%, signal=20%
HERNANDEZ_MITOTIC_ARREST_BY_DOCETAXEL_1_UP	29	0.269443	0.981984	0.472441	0.621105	1	1501	tags=21%, list=11%, signal=23%
LEE_DOUBLE_POLAR_THYMOCYTE	20	0.299818	0.981902	0.480676	0.620961	1	1814	tags=25%, list=14%, signal=29%
LEE_LIVER_CANCER_MYC_UP	52	0.234783	0.981664	0.467213	0.62122	1	3091	tags=33%, list=23%, signal=42%
DIRMEIER_LMP1_RESPONSE_EARLY	61	0.225369	0.981202	0.495822	0.622113	1	572	tags=11%, list=4%, signal=12%
CROMER_METASTASIS_UP	65	0.224463	0.98116	0.489011	0.621869	1	2987	tags=28%, list=22%, signal=36%
BIDUS_METASTASIS_DN	114	0.204259	0.980463	0.470405	0.623262	1	2043	tags=21%, list=15%, signal=25%
KAMIKUBO_MYELOID_CEBPA_NETWORK	26	0.272523	0.979905	0.503798	0.624315	1	2705	tags=31%, list=20%, signal=39%
BECKER_TAMOXIFEN_RESISTANCE_UP	49	0.243585	0.979712	0.459834	0.62446	1	2994	tags=35%, list=22%, signal=45%
SLEBOS_HEAD_AND_NECK_CANCER_WITH_HPV_UP	49	0.235674	0.979607	0.472376	0.624367	1	4284	tags=45%, list=32%, signal=66%
REACTOME_POST_TRANSLATIONAL_PROTEIN_MODIFICATION	130	0.194143	0.979381	0.517134	0.624572	1	1514	tags=16%, list=11%, signal=18%
KYNG_WERNER_SYNDROM_DN	17	0.309626	0.979006	0.4775	0.625183	1	4168	tags=65%, list=31%, signal=94%
REACTOME_RECYCLING_PATHWAY_OF_L1	24	0.278697	0.976873	0.496296	0.630336	1	3747	tags=46%, list=28%, signal=64%
TCGA_GLIOBLASTOMA_COPY_NUMBER_DN	23	0.280602	0.976555	0.480861	0.630785	1	1632	tags=17%, list=12%, signal=20%
PID_BCR_5PATHWAY	61	0.226782	0.976372	0.498688	0.630873	1	2007	tags=23%, list=15%, signal=27%
SIMBULAN_PARP1_TARGETS_DN	16	0.319033	0.975927	0.489607	0.631611	1	3760	tags=38%, list=28%, signal=52%
BIOCARTA_RELA_PATHWAY	16	0.320074	0.975712	0.498801	0.631822	1	1562	tags=25%, list=12%, signal=28%
REACTOME_M_G1_TRANSITION	67	0.220061	0.975397	0.524193	0.632312	1	1728	tags=16%, list=13%, signal=19%
SCHUETZ_BREAST_CANCER_DUCTAL_INVASIVE_DN	81	0.213822	0.974915	0.518414	0.633216	1	1987	tags=20%, list=15%, signal=23%
PID_MYC_REPRESS_PATHWAY	58	0.227718	0.974883	0.511299	0.632934	1	1440	tags=16%, list=11%, signal=17%
REACTOME_CDK_MEDIATED_PHOSPHORYLATION_AND_REMOVAL_OF_CDC6	44	0.247963	0.974505	0.5	0.633557	1	1728	tags=20%, list=13%, signal=23%
REACTOME_N_GLYCAN_ANTENNAE_ELONGATION_IN_THE_MEDIAL_TRANS_GOLGI	17	0.303516	0.974056	0.520286	0.634373	1	920	tags=24%, list=7%, signal=25%
MORI_SMALL_PRE_BII_LYMPHOCYTE_DN	65	0.221321	0.973333	0.507205	0.635865	1	4077	tags=45%, list=31%, signal=64%
REACTOME_ENOS_ACTIVATION_AND_REGULATION	16	0.304472	0.973091	0.465854	0.636124	1	1557	tags=25%, list=12%, signal=28%
KEGG_P53_SIGNALING_PATHWAY	59	0.226123	0.972526	0.5	0.637156	1	1220	tags=15%, list=9%, signal=17%
PARENT_MTOR_SIGNALING_DN	39	0.245772	0.972178	0.51087	0.637683	1	1208	tags=18%, list=9%, signal=20%
MARIADASON_RESPONSE_TO_BUTYRATE_SULINDAC_4	15	0.319222	0.97181	0.496386	0.638302	1	1017	tags=13%, list=8%, signal=14%
RICKMAN_HEAD_AND_NECK_CANCER_D	26	0.271317	0.970768	0.506596	0.64062	1	3452	tags=31%, list=26%, signal=41%
REACTOME_DESTABILIZATION_OF_MRNA_BY_AUF1_HNRNP_D0	47	0.238198	0.970526	0.487395	0.640883	1	1728	tags=19%, list=13%, signal=22%
BIOCARTA_WNT_PATHWAY	25	0.274432	0.970484	0.473945	0.640636	1	2521	tags=28%, list=19%, signal=34%
REACTOME_METABOLISM_OF_RNA	222	0.178626	0.970351	0.594595	0.640621	1	3504	tags=33%, list=26%, signal=44%
KEGG_TGF_BETA_SIGNALING_PATHWAY	78	0.217786	0.970294	0.505587	0.640392	1	1658	tags=18%, list=12%, signal=20%
ACOSTA_PROLIFERATION_INDEPENDENT_MYC_TARGETS_DN	108	0.203518	0.970213	0.502976	0.640248	1	2542	tags=23%, list=19%, signal=28%
RICKMAN_HEAD_AND_NECK_CANCER_F	47	0.231935	0.969716	0.517949	0.641159	1	3632	tags=43%, list=27%, signal=58%
GAUSSMANN_MLL_AF4_FUSION_TARGETS_F_UP	136	0.194506	0.969308	0.506494	0.641816	1	1117	tags=12%, list=8%, signal=13%
YAO_TEMPORAL_RESPONSE_TO_PROGESTERONE_CLUSTER_11	77	0.214735	0.968414	0.515244	0.6437	1	1851	tags=18%, list=14%, signal=21%
WHITFIELD_CELL_CYCLE_LITERATURE	41	0.239889	0.967724	0.487603	0.645157	1	4020	tags=41%, list=30%, signal=59%
BASSO_CD40_SIGNALING_DN	61	0.22391	0.967303	0.510264	0.645787	1	1899	tags=20%, list=14%, signal=23%
CHESLER_BRAIN_HIGHEST_GENETIC_VARIANCE	27	0.272976	0.967252	0.483029	0.645541	1	1344	tags=22%, list=10%, signal=25%
OUILLETTE_CLL_13Q14_DELETION_UP	47	0.236339	0.966397	0.523691	0.647335	1	3300	tags=38%, list=25%, signal=51%
LIU_BREAST_CANCER	20	0.294308	0.966202	0.495	0.647469	1	2384	tags=40%, list=18%, signal=49%
BOYLAN_MULTIPLE_MYELOMA_PCA3_UP	55	0.230275	0.966108	0.530026	0.647347	1	3188	tags=33%, list=24%, signal=43%
REACTOME_CELL_CYCLE_CHECKPOINTS	94	0.20673	0.965635	0.55	0.648262	1	3972	tags=41%, list=30%, signal=59%
BIOCARTA_INTEGRIN_PATHWAY	35	0.256021	0.965603	0.497382	0.647977	1	2061	tags=26%, list=15%, signal=30%
IVANOVA_HEMATOPOIESIS_EARLY_PROGENITOR	332	0.170858	0.965464	0.644144	0.647987	1	1280	tags=13%, list=10%, signal=14%
SMIRNOV_RESPONSE_TO_IR_2HR_UP	44	0.240775	0.965001	0.531343	0.648759	1	641	tags=9%, list=5%, signal=10%
HOWLIN_CITED1_TARGETS_1_UP	26	0.266585	0.964915	0.511848	0.648634	1	3768	tags=42%, list=28%, signal=59%
WEIGEL_OXIDATIVE_STRESS_BY_HNE_AND_TBH	55	0.223591	0.964134	0.529891	0.650316	1	1235	tags=16%, list=9%, signal=18%
KYNG_NORMAL_AGING_DN	20	0.293646	0.963638	0.492386	0.651157	1	4168	tags=65%, list=31%, signal=94%
REACTOME_SIGNALING_BY_ILS	96	0.204564	0.963484	0.516717	0.651166	1	2237	tags=23%, list=17%, signal=27%
REACTOME_REGULATION_OF_APOPTOSIS	51	0.229758	0.961588	0.537396	0.655682	1	2806	tags=27%, list=21%, signal=35%
GAUSSMANN_MLL_AF4_FUSION_TARGETS_C_UP	120	0.197745	0.960589	0.535088	0.65787	1	1935	tags=19%, list=15%, signal=22%
KUROZUMI_RESPONSE_TO_ONCOCYTIC_VIRUS	38	0.257658	0.960214	0.531579	0.658428	1	3672	tags=50%, list=28%, signal=69%
REACTOME_BILE_ACID_AND_BILE_SALT_METABOLISM	25	0.272263	0.959761	0.530151	0.659236	1	591	tags=12%, list=4%, signal=13%
REACTOME_GLOBAL_GENOMIC_NER_GG_NER	31	0.258228	0.959702	0.537275	0.659005	1	854	tags=13%, list=6%, signal=14%
YAGI_AML_FAB_MARKERS	174	0.183274	0.959367	0.580071	0.659564	1	2931	tags=28%, list=22%, signal=35%
BIOCARTA_CK1_PATHWAY	15	0.313748	0.959331	0.520884	0.659287	1	1950	tags=33%, list=15%, signal=39%
REACTOME_PROLONGED_ERK_ACTIVATION_EVENTS	17	0.312	0.959216	0.498812	0.659234	1	1017	tags=18%, list=8%, signal=19%
PACHER_TARGETS_OF_IGF1_AND_IGF2_UP	29	0.259715	0.959121	0.512755	0.659098	1	1779	tags=24%, list=13%, signal=28%
GENTILE_UV_HIGH_DOSE_UP	23	0.287992	0.958958	0.503817	0.659168	1	1196	tags=17%, list=9%, signal=19%
LOPES_METHYLATED_IN_COLON_CANCER_UP	23	0.274514	0.958729	0.510689	0.659417	1	2723	tags=30%, list=20%, signal=38%
MARTINEZ_RB1_AND_TP53_TARGETS_DN	433	0.166688	0.958545	0.621891	0.659504	1	3112	tags=26%, list=23%, signal=33%
TAKEDA_TARGETS_OF_NUP98_HOXA9_FUSION_6HR_UP	62	0.217395	0.958532	0.527536	0.659174	1	578	tags=11%, list=4%, signal=12%
SU_PLACENTA	25	0.272611	0.958044	0.540052	0.660037	1	1329	tags=20%, list=10%, signal=22%
BIOCARTA_RAC1_PATHWAY	23	0.274969	0.957555	0.504762	0.66089	1	1481	tags=22%, list=11%, signal=24%
BAKER_HEMATOPOIESIS_STAT3_TARGETS	15	0.313314	0.95753	0.504854	0.660592	1	387	tags=13%, list=3%, signal=14%
STEGER_ADIPOGENESIS_UP	21	0.287271	0.957372	0.489051	0.660605	1	2372	tags=29%, list=18%, signal=35%
REACTOME_METABOLISM_OF_MRNA	186	0.182328	0.957169	0.600733	0.660736	1	3504	tags=34%, list=26%, signal=45%
SANSOM_APC_TARGETS_UP	92	0.20329	0.95709	0.548287	0.660589	1	1214	tags=12%, list=9%, signal=13%
AMUNDSON_POOR_SURVIVAL_AFTER_GAMMA_RADIATION_2G	148	0.189332	0.956853	0.584507	0.660813	1	2835	tags=25%, list=21%, signal=31%
GOLUB_ALL_VS_AML_UP	24	0.273502	0.956706	0.505102	0.660823	1	2040	tags=25%, list=15%, signal=29%
MORI_LARGE_PRE_BII_LYMPHOCYTE_UP	75	0.212107	0.956436	0.543417	0.661125	1	3357	tags=33%, list=25%, signal=44%
MARTINEZ_RB1_TARGETS_DN	399	0.165851	0.955544	0.642458	0.662995	1	2606	tags=21%, list=20%, signal=25%
SEITZ_NEOPLASTIC_TRANSFORMATION_BY_8P_DELETION_DN	27	0.273209	0.955121	0.502604	0.663678	1	2905	tags=33%, list=22%, signal=43%
KANG_FLUOROURACIL_RESISTANCE_DN	16	0.315478	0.954873	0.528678	0.663982	1	257	tags=13%, list=2%, signal=13%
BYSTROEM_CORRELATED_WITH_IL5_UP	48	0.230742	0.954861	0.515493	0.66365	1	1220	tags=15%, list=9%, signal=16%
UDAYAKUMAR_MED1_TARGETS_UP	117	0.192776	0.95474	0.620805	0.663585	1	3032	tags=33%, list=23%, signal=43%
BROWN_MYELOID_CELL_DEVELOPMENT_DN	107	0.197694	0.954628	0.558559	0.663521	1	2631	tags=24%, list=20%, signal=30%
BOYAULT_LIVER_CANCER_SUBCLASS_G56_DN	15	0.314795	0.95451	0.530151	0.663443	1	1419	tags=27%, list=11%, signal=30%
JAZAG_TGFB1_SIGNALING_DN	30	0.258958	0.952813	0.536986	0.66742	1	1492	tags=17%, list=11%, signal=19%
SHETH_LIVER_CANCER_VS_TXNIP_LOSS_PAM5	62	0.221098	0.952797	0.545181	0.667103	1	2248	tags=24%, list=17%, signal=29%
TENEDINI_MEGAKARYOCYTE_MARKERS	62	0.216657	0.952081	0.583569	0.668525	1	1538	tags=16%, list=12%, signal=18%
REACTOME_MRNA_CAPPING	27	0.270048	0.952064	0.516291	0.668197	1	4855	tags=59%, list=36%, signal=93%
FIGUEROA_AML_METHYLATION_CLUSTER_3_DN	24	0.275728	0.951949	0.524064	0.668115	1	1827	tags=25%, list=14%, signal=29%
SATO_SILENCED_BY_DEACETYLATION_IN_PANCREATIC_CANCER	40	0.241578	0.951873	0.546154	0.667941	1	382	tags=10%, list=3%, signal=10%
PEART_HDAC_PROLIFERATION_CLUSTER_DN	71	0.213216	0.951793	0.574648	0.667776	1	3782	tags=38%, list=28%, signal=53%
BIOCARTA_NOS1_PATHWAY	19	0.286506	0.951759	0.533169	0.667497	1	1950	tags=32%, list=15%, signal=37%
HOLLEMAN_VINCRISTINE_RESISTANCE_ALL_UP	18	0.299601	0.951718	0.516908	0.667216	1	1843	tags=33%, list=14%, signal=39%
BOYLAN_MULTIPLE_MYELOMA_D_DN	55	0.223784	0.95169	0.550685	0.666931	1	1615	tags=18%, list=12%, signal=21%
JAATINEN_HEMATOPOIETIC_STEM_CELL_DN	183	0.181993	0.951355	0.598326	0.6674	1	2872	tags=27%, list=22%, signal=34%
REACTOME_APOPTOTIC_EXECUTION_PHASE	46	0.231647	0.951277	0.530086	0.667232	1	1830	tags=17%, list=14%, signal=20%
PENG_GLUTAMINE_DEPRIVATION_UP	35	0.255738	0.950994	0.556995	0.667552	1	2038	tags=26%, list=15%, signal=30%
MIKKELSEN_MEF_LCP_WITH_H3K4ME3	91	0.203811	0.950552	0.569767	0.668319	1	2053	tags=21%, list=15%, signal=25%
REACTOME_KERATAN_SULFATE_BIOSYNTHESIS	22	0.284329	0.949756	0.539043	0.670017	1	3086	tags=45%, list=23%, signal=59%
GROSS_ELK3_TARGETS_DN	27	0.265564	0.94885	0.515228	0.671818	1	2757	tags=33%, list=21%, signal=42%
REACTOME_L1CAM_INTERACTIONS	78	0.209109	0.947965	0.566572	0.67375	1	1075	tags=13%, list=8%, signal=14%
VALK_AML_CLUSTER_1	25	0.270849	0.947493	0.514778	0.674588	1	2543	tags=36%, list=19%, signal=44%
CHANG_CYCLING_GENES	107	0.196631	0.947064	0.572347	0.675308	1	2678	tags=23%, list=20%, signal=29%
HOFFMANN_IMMATURE_TO_MATURE_B_LYMPHOCYTE_UP	34	0.247625	0.946254	0.568922	0.676914	1	1613	tags=24%, list=12%, signal=27%
PID_CASPASE_PATHWAY	49	0.2288	0.945863	0.574124	0.677523	1	1744	tags=18%, list=13%, signal=21%
STANELLE_E2F1_TARGETS	26	0.26815	0.945616	0.557214	0.677763	1	805	tags=12%, list=6%, signal=12%
COLDREN_GEFITINIB_RESISTANCE_DN	139	0.189144	0.944875	0.622302	0.679275	1	2143	tags=18%, list=16%, signal=21%
IRITANI_MAD1_TARGETS_DN	34	0.25014	0.944239	0.554479	0.680548	1	3305	tags=41%, list=25%, signal=55%
BIOCARTA_ECM_PATHWAY	23	0.271815	0.943947	0.516883	0.68092	1	1388	tags=22%, list=10%, signal=24%
ZHAN_MULTIPLE_MYELOMA_MF_UP	35	0.250086	0.943894	0.538265	0.680674	1	2683	tags=31%, list=20%, signal=39%
DUTERTRE_ESTRADIOL_RESPONSE_6HR_DN	61	0.218156	0.943773	0.551246	0.680588	1	3041	tags=34%, list=23%, signal=44%
BIOCARTA_CCR3_PATHWAY	22	0.278783	0.943752	0.534826	0.680263	1	2569	tags=36%, list=19%, signal=45%
GEORGES_CELL_CYCLE_MIR192_TARGETS	57	0.225011	0.943548	0.540984	0.680407	1	2985	tags=30%, list=22%, signal=38%
BERTUCCI_INVASIVE_CARCINOMA_DUCTAL_VS_LOBULAR_DN	39	0.237197	0.943456	0.562176	0.680268	1	2376	tags=28%, list=18%, signal=34%
MARKS_ACETYLATED_NON_HISTONE_PROTEINS	15	0.316299	0.942611	0.5201	0.682091	1	2358	tags=27%, list=18%, signal=32%
JUBAN_TARGETS_OF_SPI1_AND_FLI1_DN	65	0.212407	0.942309	0.567493	0.682496	1	3172	tags=26%, list=24%, signal=34%
VANDESLUIS_NORMAL_EMBRYOS_DN	21	0.286337	0.942178	0.552	0.682451	1	763	tags=14%, list=6%, signal=15%
CHANDRAN_METASTASIS_TOP50_DN	34	0.252798	0.942022	0.552567	0.682486	1	2416	tags=32%, list=18%, signal=39%
NATSUME_RESPONSE_TO_INTERFERON_BETA_DN	47	0.233265	0.941771	0.562147	0.682734	1	1709	tags=21%, list=13%, signal=24%
TING_SILENCED_BY_DICER	20	0.290737	0.941169	0.524051	0.683914	1	2921	tags=30%, list=22%, signal=38%
ST_GA13_PATHWAY	36	0.24465	0.941016	0.566832	0.683939	1	944	tags=14%, list=7%, signal=15%
KIM_PTEN_TARGETS_UP	16	0.301826	0.940824	0.521092	0.684032	1	2621	tags=25%, list=20%, signal=31%
REACTOME_MITOTIC_G1_G1_S_PHASES	112	0.192326	0.940698	0.617162	0.683976	1	3799	tags=35%, list=29%, signal=48%
MISHRA_CARCINOMA_ASSOCIATED_FIBROBLAST_DN	21	0.280406	0.939297	0.556355	0.687119	1	1214	tags=19%, list=9%, signal=21%
REACTOME_ASSEMBLY_OF_THE_PRE_REPLICATIVE_COMPLEX	54	0.221836	0.938771	0.570312	0.688009	1	1728	tags=17%, list=13%, signal=19%
MEDINA_SMARCA4_TARGETS	38	0.245089	0.938481	0.56658	0.688384	1	3710	tags=42%, list=28%, signal=58%
REACTOME_CELL_CYCLE	322	0.16659	0.938252	0.6875	0.688596	1	3937	tags=34%, list=30%, signal=48%
BIOCARTA_CTCF_PATHWAY	22	0.273496	0.938237	0.541766	0.688255	1	4437	tags=45%, list=33%, signal=68%
BOQUEST_STEM_CELL_CULTURED_VS_FRESH_DN	28	0.262529	0.938128	0.573935	0.688164	1	856	tags=14%, list=6%, signal=15%
KEGG_CELL_CYCLE	105	0.196059	0.937936	0.614458	0.688298	1	3972	tags=39%, list=30%, signal=55%
GRUETZMANN_PANCREATIC_CANCER_DN	186	0.178434	0.937765	0.632867	0.688391	1	2557	tags=25%, list=19%, signal=30%
KYNG_DNA_DAMAGE_BY_4NQO_OR_UV	57	0.220885	0.937327	0.6	0.689109	1	1096	tags=14%, list=8%, signal=15%
KARLSSON_TGFB1_TARGETS_DN	157	0.18193	0.934612	0.670251	0.695524	1	1945	tags=18%, list=15%, signal=21%
KYNG_DNA_DAMAGE_BY_GAMMA_RADIATION	70	0.21304	0.934014	0.61516	0.696625	1	2584	tags=27%, list=19%, signal=33%
PYEON_CANCER_HEAD_AND_NECK_VS_CERVICAL_UP	123	0.18876	0.933921	0.634218	0.69649	1	3055	tags=28%, list=23%, signal=37%
MARTINEZ_TP53_TARGETS_DN	439	0.16143	0.933433	0.76087	0.697307	1	3112	tags=26%, list=23%, signal=33%
BIOCARTA_DC_PATHWAY	21	0.284476	0.933232	0.562341	0.697451	1	1374	tags=19%, list=10%, signal=21%
PID_BARD1_PATHWAY	28	0.256338	0.933043	0.564304	0.697564	1	1131	tags=21%, list=8%, signal=23%
LINDSTEDT_DENDRITIC_CELL_MATURATION_C	62	0.21642	0.930689	0.606952	0.703058	1	3506	tags=34%, list=26%, signal=46%
NIELSEN_LEIOMYOSARCOMA_CNN1_UP	18	0.289094	0.930618	0.567164	0.702875	1	2527	tags=28%, list=19%, signal=34%
PID_EPHRINB_REV_PATHWAY	30	0.260515	0.930522	0.557545	0.702723	1	1388	tags=20%, list=10%, signal=22%
ZHOU_CELL_CYCLE_GENES_IN_IR_RESPONSE_6HR	65	0.213814	0.930116	0.607143	0.703369	1	3031	tags=26%, list=23%, signal=34%
CHANG_IMMORTALIZED_BY_HPV31_DN	61	0.214623	0.93008	0.590395	0.703091	1	1941	tags=21%, list=15%, signal=25%
KEGG_CYTOKINE_CYTOKINE_RECEPTOR_INTERACTION	228	0.17355	0.928334	0.667984	0.707077	1	1559	tags=14%, list=12%, signal=16%
WEST_ADRENOCORTICAL_CARCINOMA_VS_ADENOMA_DN	23	0.272164	0.927714	0.58481	0.708191	1	2581	tags=26%, list=19%, signal=32%
HALMOS_CEBPA_TARGETS_DN	43	0.232212	0.92705	0.602564	0.709453	1	1666	tags=21%, list=13%, signal=24%
REACTOME_REGULATION_OF_SIGNALING_BY_CBL	18	0.294069	0.926862	0.553699	0.709537	1	1915	tags=28%, list=14%, signal=32%
BAUS_TFF2_TARGETS_UP	28	0.255928	0.926748	0.573298	0.709422	1	1500	tags=25%, list=11%, signal=28%
ST_DIFFERENTIATION_PATHWAY_IN_PC12_CELLS	42	0.229272	0.926623	0.6	0.709349	1	2538	tags=29%, list=19%, signal=35%
POMEROY_MEDULLOBLASTOMA_PROGNOSIS_DN	43	0.239425	0.925448	0.592593	0.711764	1	3127	tags=30%, list=23%, signal=39%
PID_NCADHERIN_PATHWAY	31	0.247928	0.925303	0.55774	0.711748	1	1388	tags=16%, list=10%, signal=18%
JI_METASTASIS_REPRESSED_BY_STK11	24	0.271367	0.924915	0.569307	0.712261	1	764	tags=17%, list=6%, signal=18%
LIANG_HEMATOPOIESIS_STEM_CELL_NUMBER_SMALL_VS_HUGE_DN	25	0.264893	0.924597	0.57	0.712645	1	3494	tags=44%, list=26%, signal=60%
BIOCARTA_GPCR_PATHWAY	31	0.2505	0.923852	0.58312	0.714086	1	1978	tags=26%, list=15%, signal=30%
KLEIN_PRIMARY_EFFUSION_LYMPHOMA_DN	51	0.222181	0.923097	0.609827	0.715566	1	1494	tags=16%, list=11%, signal=18%
JIANG_AGING_CEREBRAL_CORTEX_UP	33	0.243928	0.922419	0.582011	0.716874	1	2423	tags=27%, list=18%, signal=33%
BIOCARTA_CXCR4_PATHWAY	22	0.268706	0.922156	0.59799	0.717152	1	2449	tags=32%, list=18%, signal=39%
LI_WILMS_TUMOR_VS_FETAL_KIDNEY_2_UP	28	0.254596	0.921632	0.572464	0.718066	1	3294	tags=36%, list=25%, signal=47%
CHANDRAN_METASTASIS_TOP50_UP	25	0.268423	0.921357	0.584352	0.718317	1	1229	tags=20%, list=9%, signal=22%
REACTOME_CELL_CYCLE_MITOTIC	253	0.169213	0.920936	0.742063	0.718941	1	3937	tags=36%, list=30%, signal=50%
GRAESSMANN_RESPONSE_TO_MC_AND_SERUM_DEPRIVATION_DN	65	0.210392	0.920292	0.611268	0.720096	1	1886	tags=22%, list=14%, signal=25%
ZHAN_MULTIPLE_MYELOMA_HP_UP	35	0.245592	0.919865	0.58396	0.720698	1	4358	tags=60%, list=33%, signal=89%
CHUNG_BLISTER_CYTOTOXICITY_UP	93	0.191724	0.919371	0.642857	0.721539	1	3507	tags=37%, list=26%, signal=49%
REACTOME_TRNA_AMINOACYLATION	29	0.256156	0.919156	0.584416	0.721716	1	2146	tags=28%, list=16%, signal=33%
REACTOME_GASTRIN_CREB_SIGNALLING_PATHWAY_VIA_PKC_AND_MAPK	160	0.177446	0.918627	0.702786	0.722588	1	3211	tags=28%, list=24%, signal=37%
ST_B_CELL_ANTIGEN_RECEPTOR	39	0.233791	0.918433	0.605405	0.722664	1	2449	tags=28%, list=18%, signal=34%
WANG_METASTASIS_OF_BREAST_CANCER_ESR1_DN	24	0.262737	0.918245	0.601523	0.722746	1	2987	tags=38%, list=22%, signal=48%
HAHTOLA_CTCL_CUTANEOUS	26	0.256095	0.916786	0.596939	0.725953	1	3554	tags=50%, list=27%, signal=68%
RICKMAN_HEAD_AND_NECK_CANCER_A	63	0.210034	0.916781	0.627451	0.725582	1	2440	tags=24%, list=18%, signal=29%
KEGG_VASCULAR_SMOOTH_MUSCLE_CONTRACTION	102	0.191971	0.916528	0.66369	0.725837	1	1601	tags=18%, list=12%, signal=20%
PID_LYSOPHOSPHOLIPID_PATHWAY	57	0.214199	0.914959	0.66756	0.729306	1	944	tags=12%, list=7%, signal=13%
PENG_GLUCOSE_DEPRIVATION_DN	145	0.179279	0.914664	0.738806	0.729654	1	2587	tags=21%, list=19%, signal=26%
DIAZ_CHRONIC_MEYLOGENOUS_LEUKEMIA_DN	110	0.191581	0.914608	0.676012	0.729404	1	3346	tags=32%, list=25%, signal=42%
MATZUK_MEIOTIC_AND_DNA_REPAIR	32	0.244928	0.914417	0.585185	0.729434	1	2603	tags=31%, list=20%, signal=39%
STEIN_ESR1_TARGETS	79	0.202487	0.914325	0.662824	0.729264	1	2437	tags=22%, list=18%, signal=26%
MILI_PSEUDOPODIA	27	0.254389	0.914288	0.576316	0.728966	1	1624	tags=19%, list=12%, signal=21%
VALK_AML_CLUSTER_6	27	0.258192	0.914252	0.563131	0.72867	1	1351	tags=22%, list=10%, signal=25%
REACTOME_REGULATION_OF_ORNITHINE_DECARBOXYLASE_ODC	46	0.223655	0.914101	0.622535	0.728642	1	1728	tags=17%, list=13%, signal=20%
BERNARD_PPAPDC1B_TARGETS_DN	44	0.223667	0.913862	0.626437	0.728839	1	1666	tags=18%, list=13%, signal=21%
VALK_AML_CLUSTER_3	31	0.24582	0.911612	0.591837	0.733801	1	1981	tags=23%, list=15%, signal=26%
KAMMINGA_EZH2_TARGETS	36	0.243244	0.910893	0.621483	0.735184	1	2767	tags=33%, list=21%, signal=42%
ONGUSAHA_TP53_TARGETS	34	0.24262	0.910348	0.616438	0.736031	1	1808	tags=21%, list=14%, signal=24%
ALONSO_METASTASIS_DN	22	0.272357	0.909364	0.574163	0.738005	1	3129	tags=36%, list=23%, signal=47%
BIOCARTA_PPARA_PATHWAY	51	0.216994	0.908689	0.620499	0.739247	1	2115	tags=25%, list=16%, signal=30%
CROONQUIST_IL6_DEPRIVATION_DN	89	0.197395	0.908635	0.672619	0.738994	1	3782	tags=36%, list=28%, signal=50%
KEGG_SPHINGOLIPID_METABOLISM	26	0.263735	0.908074	0.597468	0.739904	1	2199	tags=27%, list=17%, signal=32%
REACTOME_MITOTIC_M_M_G1_PHASES	137	0.178496	0.905376	0.739414	0.745996	1	4440	tags=45%, list=33%, signal=67%
BIOCARTA_ALK_PATHWAY	35	0.238119	0.905319	0.604222	0.745731	1	2169	tags=26%, list=16%, signal=31%
PARK_HSC_VS_MULTIPOTENT_PROGENITORS_UP	16	0.297112	0.904826	0.611529	0.746542	1	3896	tags=44%, list=29%, signal=62%
GRADE_METASTASIS_DN	38	0.236985	0.904634	0.63089	0.746619	1	2554	tags=29%, list=19%, signal=36%
CHEOK_RESPONSE_TO_HD_MTX_DN	21	0.270545	0.904569	0.60686	0.746405	1	3987	tags=52%, list=30%, signal=75%
BONOME_OVARIAN_CANCER_POOR_SURVIVAL_UP	25	0.261399	0.901441	0.614213	0.753385	1	2638	tags=28%, list=20%, signal=35%
CHIBA_RESPONSE_TO_TSA_UP	49	0.222279	0.900651	0.654156	0.754852	1	1561	tags=18%, list=12%, signal=21%
PENG_LEUCINE_DEPRIVATION_DN	164	0.175146	0.900516	0.753623	0.754768	1	2899	tags=27%, list=22%, signal=35%
HAHTOLA_SEZARY_SYNDROM_DN	39	0.233563	0.900393	0.637255	0.754678	1	2107	tags=26%, list=16%, signal=30%
KASLER_HDAC7_TARGETS_1_DN	15	0.298236	0.89981	0.583744	0.7556	1	1501	tags=20%, list=11%, signal=23%
RIZKI_TUMOR_INVASIVENESS_2D_UP	64	0.203114	0.899584	0.659574	0.755758	1	2117	tags=19%, list=16%, signal=22%
BURTON_ADIPOGENESIS_PEAK_AT_16HR	36	0.235387	0.899581	0.641509	0.755373	1	3280	tags=36%, list=25%, signal=48%
TURASHVILI_BREAST_DUCTAL_CARCINOMA_VS_LOBULAR_NORMAL_DN	52	0.216201	0.899427	0.65508	0.755391	1	2823	tags=27%, list=21%, signal=34%
ALONSO_METASTASIS_NEURAL_UP	16	0.286414	0.899046	0.590047	0.755901	1	2220	tags=38%, list=17%, signal=45%
REACTOME_AMINO_ACID_SYNTHESIS_AND_INTERCONVERSION_TRANSAMINATION	15	0.297286	0.898841	0.585366	0.75596	1	1011	tags=20%, list=8%, signal=22%
KEGG_B_CELL_RECEPTOR_SIGNALING_PATHWAY	67	0.201406	0.898772	0.648968	0.755732	1	2007	tags=21%, list=15%, signal=24%
WANG_BARRETTS_ESOPHAGUS_UP	42	0.226988	0.8984	0.639687	0.756224	1	1899	tags=21%, list=14%, signal=25%
SHAFFER_IRF4_MULTIPLE_MYELOMA_PROGRAM	33	0.236662	0.897356	0.639037	0.758188	1	3506	tags=42%, list=26%, signal=57%
MATTIOLI_MULTIPLE_MYELOMA_SUBGROUPS	15	0.296549	0.896213	0.611374	0.760476	1	3336	tags=40%, list=25%, signal=53%
BIOCARTA_NFAT_PATHWAY	51	0.218445	0.894637	0.669355	0.763683	1	1593	tags=18%, list=12%, signal=20%
BIOCARTA_EDG1_PATHWAY	24	0.257502	0.894481	0.604265	0.763694	1	1601	tags=29%, list=12%, signal=33%
WORSCHECH_TUMOR_EVASION_AND_TOLEROGENICITY_UP	27	0.248109	0.892527	0.631043	0.767744	1	3672	tags=48%, list=28%, signal=66%
REACTOME_HOST_INTERACTIONS_OF_HIV_FACTORS	114	0.185313	0.892037	0.723906	0.768493	1	2605	tags=25%, list=20%, signal=30%
REACTOME_NUCLEOTIDE_EXCISION_REPAIR	47	0.215861	0.89138	0.671233	0.769619	1	854	tags=11%, list=6%, signal=11%
PID_HIF1_TFPATHWAY	60	0.205154	0.89133	0.685131	0.769346	1	940	tags=10%, list=7%, signal=11%
SATO_SILENCED_BY_METHYLATION_IN_PANCREATIC_CANCER_2	45	0.220174	0.891289	0.645946	0.769043	1	3750	tags=40%, list=28%, signal=55%
RASHI_RESPONSE_TO_IONIZING_RADIATION_1	35	0.228317	0.890629	0.662531	0.770131	1	2538	tags=26%, list=19%, signal=32%
BONCI_TARGETS_OF_MIR15A_AND_MIR16_1	73	0.197994	0.889666	0.704615	0.771915	1	2442	tags=26%, list=18%, signal=32%
BYSTRYKH_HEMATOPOIESIS_STEM_CELL_QTL_CIS	94	0.188264	0.889644	0.728614	0.771567	1	1855	tags=18%, list=14%, signal=21%
BIOCARTA_MET_PATHWAY	35	0.232175	0.889261	0.645729	0.772022	1	1388	tags=17%, list=10%, signal=19%
LIANG_HEMATOPOIESIS_STEM_CELL_NUMBER_SMALL_VS_HUGE_UP	31	0.237425	0.887052	0.621951	0.776613	1	2066	tags=19%, list=16%, signal=23%
TANG_SENESCENCE_TP53_TARGETS_UP	30	0.244694	0.886846	0.606557	0.776652	1	1788	tags=20%, list=13%, signal=23%
REACTOME_G1_PHASE	33	0.236793	0.88681	0.661376	0.776334	1	3729	tags=42%, list=28%, signal=59%
MARTORIATI_MDM4_TARGETS_NEUROEPITHELIUM_UP	127	0.179779	0.886593	0.773519	0.776453	1	2366	tags=23%, list=18%, signal=28%
ZHAN_MULTIPLE_MYELOMA_HP_DN	33	0.227104	0.886073	0.660574	0.777199	1	1288	tags=15%, list=10%, signal=17%
BUCKANOVICH_T_LYMPHOCYTE_HOMING_ON_TUMOR_DN	20	0.267919	0.884352	0.623737	0.780643	1	1762	tags=30%, list=13%, signal=35%
HUMMERICH_BENIGN_SKIN_TUMOR_DN	18	0.278033	0.884039	0.624113	0.780975	1	3154	tags=33%, list=24%, signal=44%
MATTIOLI_MULTIPLE_MYELOMA_WITH_14Q32_TRANSLOCATIONS	35	0.231349	0.884006	0.672634	0.780635	1	1282	tags=17%, list=10%, signal=19%
SCIBETTA_KDM5B_TARGETS_UP	16	0.290065	0.883404	0.617021	0.781592	1	2203	tags=31%, list=17%, signal=37%
REACTOME_HS_GAG_BIOSYNTHESIS	23	0.258053	0.883004	0.63	0.782099	1	2583	tags=30%, list=19%, signal=38%
SCHURINGA_STAT5A_TARGETS_UP	18	0.274969	0.881389	0.62201	0.785307	1	3218	tags=44%, list=24%, signal=59%
PENG_RAPAMYCIN_RESPONSE_DN	216	0.164581	0.880561	0.819853	0.786759	1	3172	tags=28%, list=24%, signal=36%
REACTOME_RIP_MEDIATED_NFKB_ACTIVATION_VIA_DAI	17	0.277914	0.880118	0.642857	0.787303	1	1743	tags=29%, list=13%, signal=34%
MATTIOLI_MGUS_VS_PCL	91	0.187779	0.879582	0.752187	0.788067	1	1953	tags=15%, list=15%, signal=18%
REACTOME_APOPTOSIS	128	0.176106	0.879471	0.778135	0.787901	1	1138	tags=12%, list=9%, signal=13%
REACTOME_SIGNALING_BY_WNT	59	0.205618	0.879355	0.688761	0.787751	1	2003	tags=20%, list=15%, signal=24%
REACTOME_SEMA4D_IN_SEMAPHORIN_SIGNALING	27	0.246198	0.879132	0.665	0.787855	1	3892	tags=41%, list=29%, signal=57%
WATANABE_COLON_CANCER_MSI_VS_MSS_UP	19	0.27831	0.878783	0.628429	0.788221	1	1613	tags=26%, list=12%, signal=30%
REACTOME_PROCESSING_OF_CAPPED_INTRONLESS_PRE_MRNA	17	0.283974	0.878482	0.595794	0.788455	1	2730	tags=35%, list=20%, signal=44%
GROSS_HIF1A_TARGETS_DN	20	0.267967	0.87793	0.621287	0.789222	1	2962	tags=35%, list=22%, signal=45%
PID_IL4_2PATHWAY	59	0.20827	0.877789	0.683432	0.789125	1	1470	tags=19%, list=11%, signal=21%
YAGI_AML_WITH_T_9_11_TRANSLOCATION	119	0.183835	0.875616	0.773333	0.793404	1	2619	tags=24%, list=20%, signal=30%
HERNANDEZ_ABERRANT_MITOSIS_BY_DOCETACEL_2NM_DN	22	0.26137	0.875468	0.66416	0.793304	1	4225	tags=55%, list=32%, signal=80%
KAYO_AGING_MUSCLE_DN	113	0.183688	0.875373	0.766355	0.793109	1	2908	tags=30%, list=22%, signal=38%
TIEN_INTESTINE_PROBIOTICS_2HR_UP	26	0.251736	0.875211	0.658031	0.793056	1	3000	tags=38%, list=23%, signal=50%
ABE_VEGFA_TARGETS_2HR	32	0.236346	0.875101	0.664894	0.792906	1	1183	tags=16%, list=9%, signal=17%
PID_ECADHERIN_NASCENT_AJ_PATHWAY	36	0.220167	0.874868	0.696477	0.793039	1	1388	tags=14%, list=10%, signal=15%
WANG_LSD1_TARGETS_UP	22	0.258749	0.874011	0.668449	0.794514	1	1795	tags=23%, list=13%, signal=26%
MCCLUNG_DELTA_FOSB_TARGETS_2WK	39	0.224191	0.873255	0.715517	0.795763	1	1357	tags=13%, list=10%, signal=14%
GALLUZZI_PERMEABILIZE_MITOCHONDRIA	39	0.221108	0.872933	0.691139	0.796057	1	641	tags=10%, list=5%, signal=11%
PEPPER_CHRONIC_LYMPHOCYTIC_LEUKEMIA_UP	31	0.237181	0.872589	0.688144	0.796417	1	2351	tags=23%, list=18%, signal=27%
GOBERT_CORE_OLIGODENDROCYTE_DIFFERENTIATION	32	0.238118	0.872011	0.671642	0.797237	1	3632	tags=41%, list=27%, signal=56%
BIOCARTA_PML_PATHWAY	16	0.287428	0.869199	0.613365	0.802786	1	1924	tags=25%, list=14%, signal=29%
ODONNELL_TFRC_TARGETS_DN	89	0.187066	0.868476	0.743284	0.803912	1	2546	tags=24%, list=19%, signal=29%
YAO_TEMPORAL_RESPONSE_TO_PROGESTERONE_CLUSTER_7	57	0.1999	0.868067	0.725807	0.804341	1	3208	tags=32%, list=24%, signal=41%
TOOKER_GEMCITABINE_RESISTANCE_UP	71	0.191268	0.86717	0.711048	0.80588	1	3446	tags=37%, list=26%, signal=49%
CHESLER_BRAIN_QTL_CIS	55	0.20739	0.867091	0.71137	0.80564	1	2295	tags=25%, list=17%, signal=31%
KEGG_PPAR_SIGNALING_PATHWAY	60	0.199106	0.866606	0.72807	0.806244	1	1763	tags=22%, list=13%, signal=25%
LEIN_MEDULLA_MARKERS	61	0.203428	0.865993	0.716981	0.807161	1	2571	tags=25%, list=19%, signal=30%
REACTOME_MEIOTIC_RECOMBINATION	67	0.195388	0.864631	0.754491	0.80964	1	2589	tags=24%, list=19%, signal=29%
FURUKAWA_DUSP6_TARGETS_PCI35_UP	56	0.203962	0.864248	0.730435	0.810055	1	2635	tags=27%, list=20%, signal=33%
WEBER_METHYLATED_HCP_IN_FIBROBLAST_DN	23	0.2514	0.864214	0.65942	0.80973	1	3533	tags=43%, list=27%, signal=59%
BOYLAN_MULTIPLE_MYELOMA_C_CLUSTER_DN	26	0.243688	0.863452	0.663291	0.810909	1	3439	tags=38%, list=26%, signal=52%
REACTOME_PACKAGING_OF_TELOMERE_ENDS	37	0.221717	0.863346	0.694737	0.810715	1	2589	tags=27%, list=19%, signal=33%
SHIPP_DLBCL_CURED_VS_FATAL_DN	39	0.220358	0.863248	0.720102	0.810513	1	2088	tags=23%, list=16%, signal=27%
[truncated: 237 more rows]
